# Supplementary material for: Genome resequencing clarifies phylogeny and reveals patterns of selection in the toxicogenomics model Pimephales promelas
Source: PeerJ. 2022 Aug 25;10:e13954. doi: 10.7717/peerj.13954 (PMC9420404; doi:10.7717/peerj.13954)
Supplement: Supplemental Information 5 — For the San Juan River pool of fathead minnow samples, MAF was calculated for all sites with a minimum depth of 15 and at least two reads supporting a variant. FST was calculated for windows with at least 100 called variants, with samples of each Pimephales species considered a separate population. Only windows with estimates for both parameters are shown. [file peerj-10-13954-s005.xlsx]

## Sheet: Sheet1
scaf	Average MAF per variable site	Average FST per variant site
10	0.00691486	-0.0253611
25	0.00681596	-0.00573329
43	0.00693521	0.0121738
10	0.00758137	0.021965
105	0.00906699	0.0296777
10	0.0070577	0.0381417
69	0.00681806	0.040041
64	0.00694246	0.041958
25	0.0071942	0.0452484
25	0.00785186	0.0462401
25	0.00678648	0.0470185
63	0.00678965	0.053724
82	0.00680531	0.056582
10	0.00810652	0.0590478
10	0.00740665	0.0616824
11	0.00268474	0.0691499
36	0.00704675	0.0771594
25	0.00793367	0.0796864
14	0.00240397	0.080053
10	0.00698676	0.0811087
169	0.00744245	0.0845196
50	0.00721394	0.0870106
43	0.00707832	0.0879855
38	0.00682859	0.0885652
6	0.0078695	0.0887102
54	0.00724317	0.0961168
50	0.00719207	0.0970897
38	0.00696127	0.0986897
25	0.00718879	0.0995162
248	0.00700776	0.101249
54	0.00798782	0.102019
54	0.00259785	0.102365
89	0.00897954	0.11602
5	0.00703339	0.116137
157	0.00736297	0.116389
25	0.00689677	0.116671
10	0.00239421	0.679571
10	0.00257227	0.714308
10	0.0023133	0.742756
11	0.00190096	0.779663
110	0.00239566	0.684391
110	0.00221585	0.699931
112	0.00237361	0.68607
118	0.00256606	0.635994
130	0.00215221	0.813565
130	0.00204183	0.669297
15	0.00247734	0.663464
17	0.00265874	0.719403
17	0.00251211	0.739756
20	0.00275892	0.733203
20	0.00222964	0.712803
229	0.00274455	0.677388
24	0.00164984	0.6812
24	0.00220777	0.674908
24	0.00242783	0.686701
259	0.00247208	0.653885
26	0.00211539	0.821238
26	0.00210119	0.649004
287	0.00264579	0.637962
293	0.0025595	0.723022
311	0.00200198	0.713819
311	0.00197583	0.673864
313	0.00259721	0.646813
38	0.00218222	0.692443
38	0.0019226	0.738643
38	0.00217339	0.706018
38	0.00203473	0.738966
38	0.00250476	0.77425
40	0.00199181	0.722572
40	0.00201763	0.696961
45	0.0022495	0.654896
45	0.0019547	0.727645
45	0.00172603	0.683207
45	0.00175082	0.823058
45	0.00159223	0.880644
45	0.00173489	0.857987
45	0.00162355	0.872704
45	0.00165769	0.912092
45	0.00177536	0.910568
45	0.00166141	0.902086
45	0.00221635	0.836923
51	0.00258225	0.70961
62	0.00699413	0.705156
62	0.00270956	0.77359
65	0.0022504	0.636706
7	0.00270434	0.670595
7	0.00252387	0.650329
7	0.00209675	0.700175
7	0.00252289	0.707271
7	0.0020681	0.723323
7	0.00207092	0.651045
7	0.00200337	0.738295
7	0.00226854	0.758802
8	0.00262632	0.683759
9	0.00270587	0.63782
9	0.00239464	0.776233
9	0.00179344	0.801557
9	0.00238402	0.654705
9	0.00185172	0.67769
9	0.00215624	0.657921
9	0.0018569	0.722135
9	0.00224916	0.684181
9	0.00203868	0.679125
9	0.00237209	0.74037
9	0.00262503	0.718977
11	0.00450542	-0.0644655
50	0.00537167	-0.0506708
1	0.00511226	-0.0371648
85	0.00490368	-0.0137692
9	0.00582553	-0.0128734
37	0.00585781	-0.0102218
6	0.00598744	-0.00999386
25	0.00587164	-0.00307143
165	0.0048034	-0.00285091
116	0.00514868	0.00271457
153	0.00471123	0.0039011
169	0.00563706	0.00408874
63	0.00647532	0.00432636
6	0.0056569	0.0073269
119	0.00413827	0.00740893
36	0.0046482	0.00862679
6	0.00559498	0.00868946
1	0.00626511	0.0124228
25	0.00516943	0.0140499
82	0.00588431	0.0154667
144	0.00537449	0.0157524
163	0.00559269	0.0169877
19	0.00609811	0.0178679
169	0.00629242	0.0179028
16	0.00458331	0.0190112
102	0.0056446	0.0215805
6	0.00623182	0.0232112
6	0.0058599	0.0237456
8	0.00449465	0.0238673
9	0.00553415	0.0246175
64	0.00511201	0.0249071
6	0.00577242	0.0254793
156	0.00589427	0.0260031
7	0.00314425	0.0266489
8	0.00590886	0.0272056
6	0.0058711	0.0272787
50	0.00604791	0.0275666
128	0.00596163	0.0276939
3	0.00522854	0.0278887
26	0.00474976	0.0289294
161	0.00572811	0.0314731
35	0.00555501	0.0320357
25	0.0060252	0.0328074
6	0.00548298	0.0328673
157	0.0045593	0.0330365
153	0.00438026	0.0331541
117	0.00587438	0.0337428
82	0.0054776	0.0344482
20	0.00470528	0.0347769
171	0.0051076	0.0351819
17	0.0034263	0.0355238
6	0.0052388	0.0358131
10	0.00577567	0.0379736
208	0.00670742	0.039631
3	0.00465769	0.0409095
115	0.00530372	0.0429635
35	0.0055779	0.0441211
116	0.00495915	0.0446124
36	0.00540828	0.0449594
82	0.00506222	0.0468052
82	0.00593132	0.0480284
10	0.00473984	0.0480424
152	0.00501002	0.0486656
128	0.00607082	0.0489559
38	0.00573824	0.0490016
144	0.00656982	0.0499719
153	0.00528732	0.0515071
64	0.00469801	0.0516747
153	0.00452488	0.0521965
19	0.00550305	0.0524722
25	0.00630017	0.0525381
17	0.00621052	0.0535678
23	0.00544057	0.053692
37	0.00572224	0.0544077
116	0.00564517	0.0548865
134	0.00648364	0.055074
160	0.00514503	0.0552102
153	0.00553987	0.0571431
82	0.00647201	0.05717
2	0.00596654	0.0582116
128	0.00607777	0.0588359
82	0.00652599	0.0588771
10	0.00647186	0.0608945
38	0.00582067	0.0615624
67	0.00602727	0.0619264
25	0.00633117	0.0624715
64	0.00502427	0.0632092
14	0.00546148	0.0642522
124	0.00590227	0.0652689
161	0.00620417	0.065304
82	0.00587205	0.0659283
144	0.00642651	0.0660643
7	0.00509386	0.0681041
14	0.00481157	0.0681074
82	0.00656777	0.0687499
25	0.00596838	0.0691917
124	0.00605139	0.0693076
9	0.0049258	0.0696121
9	0.00496913	0.0697804
35	0.00578237	0.069851
115	0.00429168	0.0700302
10	0.00618948	0.0700822
86	0.00595901	0.070599
10	0.0048493	0.0707154
6	0.00566143	0.0709387
171	0.00602637	0.0711684
11	0.00347508	0.0714852
35	0.00573416	0.0716002
102	0.00561111	0.071742
95	0.00519804	0.0726401
153	0.00512945	0.0730983
3	0.00578436	0.07353
115	0.00519552	0.0745238
35	0.00541355	0.0752454
50	0.00617972	0.0752953
82	0.00596439	0.0753398
10	0.00659542	0.0755189
3	0.00494559	0.0756826
184	0.00429137	0.0759238
160	0.00530102	0.0761201
52	0.00611927	0.0767657
63	0.00502958	0.0768134
46	0.00466948	0.0772883
28	0.00475673	0.0783229
64	0.00493435	0.0786758
64	0.00426334	0.0787633
212	0.00469016	0.0788138
50	0.00581962	0.0789101
36	0.00532073	0.0792113
17	0.00610716	0.079288
89	0.00640412	0.079306
51	0.00513378	0.0794143
25	0.00642436	0.0796595
7	0.00440041	0.0798164
171	0.00605609	0.0804091
129	0.00482813	0.0807132
116	0.00545502	0.081983
116	0.0059151	0.0825109
10	0.0059305	0.082959
9	0.00526135	0.0831055
28	0.00655476	0.0834652
89	0.0050204	0.0840252
12	0.00483338	0.0842015
72	0.00609686	0.0843169
7	0.00632407	0.0847041
116	0.00526256	0.0849656
49	0.00542075	0.0852441
11	0.00355311	0.0854275
90	0.00511371	0.0856581
50	0.00488517	0.0858945
69	0.00542601	0.0864808
119	0.00551486	0.0865507
25	0.0060201	0.0869564
6	0.00620201	0.0872258
64	0.00538203	0.0876332
7	0.0038793	0.087759
11	0.00427047	0.087939
19	0.00554424	0.0885874
25	0.00644537	0.089183
163	0.00626569	0.0895671
26	0.0045633	0.0900538
116	0.00472848	0.0922655
6	0.00568297	0.0924806
127	0.00600028	0.0929637
37	0.00536924	0.0937775
89	0.00477942	0.0939307
3	0.00552263	0.094382
144	0.00556337	0.0944823
152	0.00533184	0.0947425
14	0.00515632	0.0949125
204	0.00580527	0.0950654
7	0.00471703	0.0960113
35	0.00573146	0.0961667
45	0.0052307	0.0965435
35	0.00553983	0.0969353
89	0.00532782	0.0969415
157	0.00642577	0.097001
53	0.00546956	0.0975917
36	0.0055875	0.0977587
26	0.00609141	0.0981802
64	0.00601282	0.0982772
128	0.00603522	0.0988518
6	0.00589557	0.0988647
116	0.00459303	0.098923
21	0.00504077	0.0991405
37	0.00599366	0.0991816
213	0.0051107	0.0991859
25	0.0065765	0.0995666
177	0.00588271	0.0995931
248	0.00628273	0.0997809
82	0.00555471	0.0999628
50	0.00636431	0.100612
157	0.00653316	0.100727
20	0.00462552	0.100912
101	0.0053385	0.101014
7	0.00469417	0.10111
82	0.00597009	0.101433
10	0.00533458	0.101721
50	0.00663871	0.102898
50	0.00583892	0.103566
115	0.00490318	0.103935
64	0.00594187	0.104442
169	0.0056556	0.10475
171	0.0060969	0.10483
9	0.0038215	0.105521
57	0.00533999	0.106125
184	0.00454678	0.106154
27	0.00569501	0.10636
10	0.00529974	0.106669
86	0.00506294	0.106824
25	0.00649302	0.106926
50	0.00567549	0.10717
115	0.00378567	0.107958
128	0.00631083	0.107977
124	0.00487313	0.108236
3	0.00509735	0.108248
72	0.00478468	0.108407
86	0.00540187	0.108651
89	0.00571207	0.108914
19	0.00535643	0.109227
6	0.00563087	0.109253
50	0.00616299	0.10927
64	0.0061416	0.109484
35	0.00464409	0.109529
115	0.0053564	0.109581
63	0.00554171	0.109763
13	0.00422808	0.10981
46	0.0045851	0.109935
64	0.00592541	0.110044
86	0.00560063	0.11053
6	0.00552778	0.110541
35	0.00577484	0.110655
209	0.0053488	0.110715
82	0.00597635	0.110877
117	0.00504368	0.111177
160	0.00387877	0.111231
95	0.00577791	0.111489
3	0.00672873	0.111597
80	0.00464653	0.111942
3	0.003792	0.112072
84	0.00578068	0.112634
82	0.00521352	0.113434
19	0.006626	0.113566
57	0.00572839	0.113993
157	0.00483007	0.114008
63	0.00568107	0.114258
200	0.00461518	0.114783
11	0.00369452	0.114822
13	0.00507908	0.114891
144	0.00607134	0.115
82	0.006375	0.115015
45	0.00563679	0.115089
117	0.00547247	0.115404
117	0.00606791	0.115587
177	0.0052637	0.115609
128	0.00517001	0.115664
117	0.00549541	0.115666
128	0.00577053	0.115817
46	0.00479719	0.115906
200	0.00516729	0.11592
116	0.00577086	0.116157
82	0.00638604	0.116464
46	0.00507872	0.116838
35	0.00475521	0.117027
115	0.00388614	0.117032
18	0.00710646	0.118898
25	0.00733132	0.120709
25	0.00711262	0.121332
25	0.00696848	0.121741
54	0.00685164	0.125383
221	0.00747979	0.126567
6	0.00743519	0.126835
20	0.00971882	0.129281
5	0.0105374	0.129653
10	0.00688738	0.129955
10	0.00691288	0.13196
25	0.00819924	0.132519
18	0.00808015	0.134129
18	0.00726184	0.134602
242	0.0069293	0.134949
3	0.00722825	0.13542
25	0.00719061	0.13711
6	0.00744149	0.138022
73	0.00683384	0.141844
10	0.00757702	0.143478
7	0.4	0.144425
2	0.00718113	0.144815
15	0.0027298	0.145879
247	0.00685132	0.150605
70	0.00683808	0.151717
25	0.0114373	0.154066
129	0.00773487	0.155998
165	0.00163496	0.156603
62	0.00776131	0.156988
73	0.00769126	0.15862
5	0.007176	0.159255
242	0.00847626	0.164269
10	0.00733678	0.16884
8	0.00717719	0.169167
3	0.00188952	0.169666
25	0.00800104	0.170775
10	0.00699749	0.175472
19	0.00677915	0.178628
211	0.00695874	0.178754
18	0.00761923	0.178821
25	0.00676023	0.1818
63	0.0070613	0.184027
157	0.0088406	0.185298
28	0.00807666	0.185496
25	0.00793645	0.187337
35	0.00695935	0.188244
25	0.00855594	0.190883
82	0.00689571	0.196199
157	0.00723925	0.196584
309	0.00200497	0.19738
25	0.0074599	0.197669
10	0.00230063	0.199635
3	0.00736423	0.202533
95	0.0093668	0.203294
116	0.00675038	0.203804
6	0.00738422	0.20435
54	0.00704148	0.205917
12	0.00709735	0.206203
3	0.00259978	0.206583
25	0.00208948	0.209491
200	0.00713288	0.211183
25	0.00727053	0.211444
84	0.00689951	0.211908
19	0.00677368	0.212081
18	0.00702313	0.212783
80	0.00208015	0.214855
38	0.00699663	0.218342
52	0.00248554	0.219326
3	0.00706704	0.221652
185	0.00682185	0.222161
10	0.00720695	0.22236
127	0.00706491	0.223387
28	0.00213138	0.223746
14	0.00839454	0.22578
10	0.00749048	0.226465
1	0.00184824	0.227017
90	0.00838577	0.227657
63	0.00679976	0.229821
3	0.0125603	0.230607
144	0.00686141	0.230691
10	0.00682998	0.233995
125	0.00236613	0.234136
247	0.00760407	0.234672
8	0.00257003	0.234772
57	0.00180857	0.235773
125	0.0073544	0.236143
37	0.00689767	0.23758
19	0.00913045	0.23778
57	0.00953671	0.24007
25	0.00765376	0.240708
50	0.00687571	0.24074
127	0.00776662	0.242489
124	0.00675596	0.242632
63	0.00685837	0.24458
83	0.00247353	0.24506
213	0.00810916	0.245851
25	0.00756307	0.246805
20	0.00675799	0.249838
27	0.00747619	0.250198
140	0.00690906	0.251561
10	0.00693957	0.252464
82	0.00786603	0.252629
127	0.00689673	0.253183
45	0.00275393	0.253368
10	0.00744496	0.255877
46	0.00739411	0.256344
127	0.0073036	0.257169
89	0.00681728	0.257526
105	0.00736112	0.259495
19	0.0131391	0.260029
96	0.00266805	0.260065
157	0.00690475	0.260086
69	0.00704901	0.260277
152	0.00713735	0.262281
5	0.00687251	0.262577
6	0.00826618	0.262608
38	0.00218329	0.262758
6	0.00799555	0.264028
194	0.00689565	0.264123
3	0.00709047	0.265945
1	0.00275109	0.268392
127	0.00687558	0.269174
28	0.00204255	0.269188
194	0.0072413	0.270258
2	0.00694278	0.270622
158	0.0071012	0.270998
244	0.006772	0.271167
43	0.00958063	0.271338
82	0.00734358	0.274175
127	0.00698773	0.274758
193	0.00863867	0.274933
19	0.00696832	0.275683
124	0.00686561	0.278009
18	0.00677533	0.27931
11	0.00226288	0.279687
25	0.00697445	0.28067
28	0.00260607	0.280789
109	0.00720643	0.281875
10	0.00707656	0.282502
172	0.00686902	0.283288
20	0.00742039	0.284164
10	0.00676478	0.285273
10	0.00712426	0.290798
81	0.0074611	0.29201
20	0.00690709	0.292906
101	0.00690742	0.294137
63	0.00679334	0.294788
28	0.00697021	0.294819
37	0.00732207	0.29491
82	0.0075176	0.295185
28	0.00276481	0.295929
3	0.00724605	0.300144
55	0.124359	0.302586
104	0.00263103	0.302589
82	0.00893791	0.304206
2	0.00724529	0.304346
109	0.00909731	0.304537
194	0.00686717	0.304803
24	0.00277	0.304896
69	0.00674651	0.305294
69	0.00748914	0.305507
63	0.00684553	0.306066
6	0.00885547	0.306139
36	0.00700594	0.306566
194	0.00728031	0.307299
25	0.00680969	0.308532
27	0.00710139	0.309575
27	0.00836738	0.309958
20	0.00737897	0.310242
6	0.00698199	0.31054
28	0.00239046	0.310769
152	0.00706797	0.311752
19	0.00710508	0.312403
8	0.00680775	0.313468
25	0.00675483	0.3137
13	0.00225364	0.313948
24	0.00253126	0.314634
70	0.00807784	0.315497
8	0.00675834	0.315677
124	0.00708487	0.316334
32	0.0100915	0.316731
13	0.00856688	0.316832
64	0.00275386	0.317572
3	0.00855502	0.31764
10	0.00705665	0.318648
37	0.00250102	0.319243
82	0.00748632	0.321003
20	0.00239664	0.321246
8	0.00687376	0.321343
109	0.00744239	0.322925
9	0.00232908	0.327158
163	0.00834027	0.327609
86	0.00706854	0.327845
1	0.00267981	0.327906
28	0.00688788	0.328625
6	0.00694659	0.329472
1	0.00277571	0.329598
133	0.00702545	0.330142
9	0.00156009	0.330995
23	0.00222205	0.332044
42	0.00676881	0.33328
196	0.00251623	0.337062
180	0.00856928	0.337146
120	0.00717007	0.33737
2	0.00754426	0.3376
3	0.00944644	0.338192
34	0.00269588	0.338211
139	0.00268215	0.338239
3	0.00985762	0.338853
109	0.00774362	0.339288
168	0.00232371	0.3397
61	0.00975436	0.341325
10	0.00229467	0.344263
14	0.00702552	0.344283
36	0.00677806	0.344782
131	0.00683886	0.345973
63	0.00699854	0.346834
24	0.00265509	0.348376
45	0.00253677	0.348987
10	0.00727841	0.349432
169	0.00708408	0.349697
169	0.00681307	0.350314
91	0.00683882	0.35103
10	0.00707318	0.351566
93	0.00705481	0.352217
2	0.00250667	0.352225
70	0.0024174	0.352903
105	0.0070507	0.354373
3	0.00677886	0.358037
24	0.00265507	0.358694
2	0.00265752	0.360711
96	0.00263225	0.361422
2	0.00719728	0.362418
90	0.00690653	0.365979
74	0.00258219	0.36615
64	0.0067796	0.366317
43	0.00677586	0.366639
99	0.00211294	0.370427
73	0.00701463	0.371494
152	0.00723797	0.372416
19	0.4375	0.373211
1	0.00833947	0.373999
10	0.00220857	0.374173
9	0.00277424	0.375273
15	0.00167449	0.376232
209	0.00698729	0.376501
20	0.00700555	0.376801
91	0.00700678	0.379545
20	0.00694137	0.380696
216	0.00735518	0.381658
24	0.00270379	0.381788
132	0.00710065	0.382013
71	0.00256065	0.382882
24	0.00276097	0.383268
183	0.0104009	0.383357
219	0.00269761	0.38341
295	0.00277587	0.383677
188	0.00122194	0.384814
109	0.00695089	0.385008
24	0.00273362	0.385359
2	0.007185	0.386024
3	0.00207909	0.386683
3	0.00267807	0.38879
15	0.0072517	0.389176
53	0.00688818	0.389542
36	0.00784888	0.389776
228	0.00244594	0.389923
57	0.00188811	0.390354
45	0.00274759	0.390492
93	0.00720225	0.392002
25	0.00786755	0.392061
24	0.00238285	0.392333
119	0.00699096	0.395753
2	0.010205	0.396129
122	0.00237133	0.396977
74	0.00257952	0.397266
8	0.00677688	0.397464
10	0.00224701	0.400422
86	0.00741793	0.400578
35	0.00807068	0.40089
34	0.00715711	0.40142
25	0.00754727	0.401613
54	0.0023243	0.403165
24	0.00259379	0.403312
2	0.00259871	0.404698
2	0.00267116	0.404841
16	0.00684057	0.405125
74	0.00683813	0.406327
1	0.00227308	0.406968
5	0.00696819	0.408623
29	0.00890418	0.410292
54	0.00261355	0.41077
39	0.00150792	0.411678
180	0.00725981	0.411867
74	0.00267194	0.41322
42	0.00747318	0.413243
8	0.00256455	0.413356
28	0.00937893	0.415912
70	0.00696189	0.41595
6	0.0072964	0.416233
24	0.00233876	0.417409
97	0.00266978	0.419771
17	0.00247853	0.420898
6	0.00715881	0.421937
91	0.00702825	0.421981
11	0.00260355	0.422833
6	0.00239516	0.423535
24	0.00276667	0.424563
77	0.00183377	0.424741
65	0.00257896	0.425677
51	0.00250341	0.425735
9	0.00158097	0.426002
24	0.00684199	0.427935
16	0.00842198	0.430738
3	0.00245174	0.430961
1	0.00237436	0.432781
132	0.0018652	0.43394
3	0.00238015	0.434636
110	0.00267305	0.435127
130	0.00274041	0.435174
7	0.00263598	0.436964
179	0.00690231	0.437236
64	0.00093582	0.437376
7	0.00268294	0.440397
4	0.00235015	0.441326
1	0.330592	0.441739
49	0.00689413	0.443588
54	0.00243599	0.444524
13	0.00266421	0.444757
132	0.00685893	0.445933
119	0.00680063	0.447922
125	0.00269576	0.448045
40	0.00228198	0.449402
54	0.00237734	0.450484
62	0.002565	0.452581
81	0.0025353	0.452693
9	0.00719668	0.454319
12	0.00270191	0.454801
149	0.00704646	0.455172
248	0.00708421	0.459192
17	0.00260105	0.45923
15	0.00252598	0.46029
94	0.00687076	0.46094
287	0.00224498	0.461215
234	0.00233789	0.463625
28	0.00794581	0.464658
183	0.00234708	0.464913
148	0.00721033	0.465084
20	0.00742058	0.465244
24	0.00259327	0.465641
15	0.00238872	0.46739
331	0.00269384	0.468979
27	0.00272464	0.470121
24	0.00197243	0.470842
15	0.00674564	0.471181
17	0.00266368	0.47242
15	0.00272537	0.472548
219	0.00251632	0.475029
24	0.00245	0.479417
4	0.00267464	0.479469
64	0.007795	0.481638
219	0.00246431	0.48172
12	0.0074201	0.481791
12	0.00226359	0.481964
17	0.00266093	0.48339
92	0.0108723	0.484126
99	0.002727	0.484918
360	0.00214366	0.486071
17	0.00235055	0.487662
11	0.133333	0.490675
14	0.00798887	0.49131
219	0.00218422	0.493563
112	0.00142586	0.493608
23	0.00188394	0.493913
5	0.0105779	0.494914
118	0.00168456	0.494923
15	0.0102333	0.495258
28	0.00710902	0.495329
173	0.00239095	0.496799
17	0.00259775	0.497294
29	0.00195325	0.497519
10	0.00790424	0.497837
36	0.00203457	0.498562
1	0.00269988	0.49872
26	0.00268089	0.499044
3	0.0084791	0.499108
20	0.00706707	0.500295
24	0.00171041	0.500614
96	0.00844388	0.501553
225	0.00835369	0.50203
112	0.00249062	0.502776
15	0.00902235	0.503965
7	0.00264913	0.50403
13	0.00259275	0.506997
13	0.00249382	0.507164
45	0.00179293	0.50728
164	0.00814361	0.507677
294	0.00139677	0.507978
29	0.00211951	0.508988
18	0.00711533	0.509198
6	0.00698389	0.509322
24	0.00233511	0.509509
77	0.00183599	0.510393
130	0.00258135	0.511032
3	0.00678368	0.511929
130	0.00256277	0.512246
24	0.00222919	0.513322
15	0.00271377	0.514206
24	0.00190317	0.514671
12	0.00229846	0.514702
24	0.00253306	0.515786
12	0.00214392	0.516359
15	0.00270851	0.51641
54	0.00261317	0.517839
1	0.00727485	0.518794
15	0.0025977	0.519915
44	0.00261259	0.520203
21	0.00266172	0.521069
54	0.00684558	0.52192
24	0.00247846	0.523127
296	0.00275733	0.523491
29	0.00256008	0.525332
38	0.00718552	0.526258
18	0.0027507	0.526308
6	0.00199767	0.526673
4	0.0024265	0.526912
80	0.00152456	0.528624
10	0.00260489	0.529072
269	0.00271167	0.529318
1	0.00262568	0.529846
8	0.00208075	0.53062
15	0.00705256	0.531006
54	0.00214621	0.531408
13	0.00211862	0.534408
68	0.00201139	0.535589
15	0.00179711	0.537622
17	0.00264659	0.538351
34	0.00271017	0.538486
17	0.00680576	0.542094
15	0.00276085	0.542418
17	0.00221867	0.542795
7	0.00840621	0.543782
9	0.00269384	0.544911
7	0.00273938	0.549205
15	0.00277513	0.549867
15	0.00273707	0.55008
219	0.00260175	0.550969
7	0.00251923	0.551366
24	0.0025409	0.554132
2	0.00245225	0.554646
23	0.0019053	0.555518
108	0.00270253	0.555771
1	0.0101087	0.557498
42	0.00274029	0.55795
11	0.00831897	0.558632
45	0.00243631	0.561514
15	0.00237836	0.562862
227	0.00240461	0.56478
219	0.00220585	0.565222
23	0.00268625	0.566801
24	0.00676168	0.568698
174	0.00258321	0.572087
10	0.00274189	0.572726
12	0.00214429	0.574963
24	0.00263125	0.583196
38	0.00254715	0.584189
287	0.00269814	0.586808
75	0.00234481	0.587114
52	0.00261896	0.588172
20	0.0027236	0.590459
241	0.0024896	0.591146
130	0.00186147	0.59179
9	0.00898062	0.592783
7	0.00249995	0.593415
29	0.00241308	0.594803
313	0.00103207	0.596059
6	0.00263523	0.597689
15	0.00259027	0.598145
54	0.00208857	0.598156
112	0.00221619	0.600741
92	0.00222503	0.604781
23	0.00249678	0.611496
130	0.00195244	0.611658
29	0.00213972	0.612267
38	0.00216033	0.614771
130	0.0017309	0.618951
45	0.00271598	0.619039
9	0.00186041	0.620314
45	0.00272378	0.621502
24	0.00205057	0.623444
8	0.00228119	0.625298
4	0.00270375	0.625905
7	0.00203039	0.628983
40	0.00270636	0.629136
92	0.00255927	0.629507
9	0.0019126	0.633105
240	0.00238316	0.634862
21	0.00385454	0.634929
4	0.00422321	0.634938
67	0.00554448	0.635084
25	0.00466052	0.635191
190	0.00475577	0.635333
4	0.00425175	0.635523
6	0.00411253	0.635741
67	0.00370386	0.635856
18	0.00409586	0.636152
20	0.00312585	0.6364
15	0.00418302	0.636422
67	0.00307583	0.636948
39	0.00567167	0.637054
21	0.00406258	0.637175
8	0.00379454	0.637249
390	0.00470775	0.637622
7	0.00422422	0.637697
48	0.00363595	0.637805
14	0.00418156	0.638065
9	0.0030213	0.638106
6	0.00399299	0.638124
84	0.00413523	0.638372
14	0.00468352	0.638444
20	0.00354608	0.638637
79	0.00424482	0.638663
18	0.00499547	0.638967
84	0.00533542	0.639046
2	0.00409325	0.639325
24	0.00307616	0.639597
18	0.00438262	0.639755
3	0.00366753	0.639775
2	0.00375446	0.640204
9	0.00396759	0.640276
246	0.00563925	0.640495
6	0.00362314	0.640498
66	0.00407223	0.640744
12	0.00515068	0.640777
17	0.00405171	0.640779
20	0.00417005	0.640846
2	0.00377659	0.640916
118	0.00450875	0.641079
30	0.00443811	0.641119
3	0.00384585	0.64113
6	0.00388031	0.641251
79	0.00521534	0.641638
5	0.00440095	0.642673
21	0.00287858	0.642876
9	0.0030878	0.64307
12	0.00316471	0.643181
123	0.00395235	0.64341
92	0.00294208	0.643499
1	0.00381533	0.643552
62	0.00453803	0.643673
9	0.00300968	0.643699
81	0.00443076	0.643854
81	0.00340049	0.644195
24	0.00329428	0.644334
315	0.00328702	0.644394
33	0.00377274	0.6445
112	0.00316314	0.645163
16	0.00519236	0.645412
36	0.00371363	0.645727
51	0.00316155	0.646408
7	0.00469511	0.646576
24	0.00328053	0.646673
56	0.00421391	0.646817
12	0.00286085	0.646832
18	0.00473057	0.647294
18	0.00539017	0.647504
138	0.00332717	0.647528
33	0.00326559	0.647802
246	0.00560482	0.647806
44	0.00372259	0.647909
18	0.00469106	0.648079
62	0.00390237	0.648102
12	0.00353897	0.648154
20	0.0044527	0.648352
44	0.00333594	0.648502
66	0.00525291	0.64853
20	0.00346894	0.648753
92	0.00433077	0.649298
7	0.00417158	0.649355
18	0.00545223	0.649545
92	0.00417075	0.649926
5	0.00420335	0.649976
66	0.00283815	0.650219
5	0.00367473	0.650334
42	0.00410117	0.650766
148	0.00471366	0.650779
17	0.00490441	0.651054
6	0.00355149	0.651236
23	0.00450634	0.651389
2	0.00477911	0.651631
17	0.0047752	0.65199
18	0.00485028	0.652093
285	0.00309849	0.652232
62	0.00443155	0.652682
138	0.00447585	0.653642
23	0.00372628	0.653752
4	0.00485872	0.653954
26	0.00457664	0.654061
138	0.00396391	0.654221
122	0.00529918	0.654422
17	0.00604567	0.654755
18	0.00499903	0.655196
20	0.00389029	0.655215
67	0.00409363	0.655223
120	0.00378989	0.656413
1	0.00361073	0.656589
130	0.0032694	0.656649
21	0.00357066	0.656858
6	0.00465406	0.656876
10	0.00320062	0.659795
10	0.00318524	0.659801
1	0.00447283	0.660084
7	0.00309767	0.660333
43	0.00418466	0.660774
1	0.00482106	0.660807
30	0.00476953	0.660972
9	0.00281083	0.661024
62	0.00312864	0.661337
62	0.00369862	0.661603
18	0.00382877	0.661637
120	0.00448569	0.662256
2	0.00354917	0.662359
7	0.00503598	0.662541
2	0.00404589	0.662732
43	0.00512918	0.663289
211	0.00369809	0.663906
129	0.00305061	0.663987
111	0.00416483	0.66444
7	0.00496865	0.664532
22	0.00561128	0.665372
15	0.00337095	0.665992
111	0.00357096	0.666203
6	0.00340802	0.667334
7	0.00409943	0.66734
40	0.0033983	0.667745
2	0.00504874	0.668196
75	0.0037387	0.668588
120	0.00286825	0.669241
129	0.00604927	0.669566
38	0.00313709	0.669702
9	0.00305324	0.669744
12	0.00445997	0.670071
12	0.00473886	0.670107
62	0.00366183	0.67042
16	0.0044566	0.670943
33	0.00364365	0.671125
16	0.00320432	0.671193
17	0.00536441	0.671597
246	0.00619238	0.671772
21	0.0038945	0.671927
120	0.00349139	0.672417
15	0.00282571	0.673106
60	0.00414188	0.674112
92	0.00345821	0.674804
7	0.00461117	0.674864
43	0.00464635	0.675039
120	0.00337427	0.675131
173	0.00498716	0.675252
7	0.00286708	0.675256
44	0.00437944	0.675289
7	0.00386517	0.675569
7	0.00449464	0.677243
75	0.00368944	0.677726
599	0.00347786	0.678291
301	0.00423433	0.678425
293	0.00283032	0.678565
26	0.00401761	0.679178
65	0.00381256	0.680986
21	0.0044537	0.681588
382	0.0033769	0.681789
21	0.00285837	0.683783
42	0.00372494	0.684355
285	0.00303004	0.68507
7	0.00390427	0.685821
56	0.00288198	0.686259
43	0.00465663	0.687284
21	0.00306345	0.691297
7	0.00322151	0.69269
16	0.00488991	0.692958
13	0.00366853	0.692992
38	0.0034129	0.693481
17	0.00314404	0.694324
18	0.00395866	0.695826
38	0.00359248	0.696738
6	0.00301886	0.697766
6	0.00409422	0.700826
38	0.00335813	0.702031
26	0.00564722	0.703877
81	0.00359704	0.704681
18	0.00332575	0.706099
189	0.00404553	0.706103
192	0.00376727	0.706483
92	0.00376932	0.707382
38	0.00443618	0.708018
9	0.00328584	0.708282
7	0.00403302	0.70838
60	0.00510624	0.710075
293	0.00308944	0.710112
38	0.00367218	0.712129
9	0.0032463	0.712839
51	0.00283653	0.713069
43	0.0052174	0.715895
7	0.00474244	0.717432
110	0.00310952	0.720102
7	0.00299071	0.720115
6	0.00343338	0.720334
9	0.00289456	0.721349
9	0.00365707	0.721509
51	0.00294833	0.725315
9	0.0030763	0.727361
18	0.00341084	0.731191
9	0.00299861	0.735431
7	0.00307235	0.736825
130	0.00301265	0.737889
7	0.00325743	0.743846
20	0.00389644	0.747747
23	0.00359253	0.749723
7	0.003578	0.755417
51	0.00301501	0.756977
26	0.00287141	0.757745
7	0.00327961	0.757931
20	0.00372952	0.764024
192	0.00362519	0.776866
11	0.00446295	0.779663
62	0.00326765	0.781572
18	0.00358569	0.788395
38	0.00298225	0.79624
62	0.00453576	0.803845
26	0.00415078	0.827042
19	0.00486607	0.117086
8	0.00510315	0.117529
69	0.00547998	0.118196
6	0.00464501	0.118204
60	0.00473483	0.118624
18	0.00668311	0.118782
156	0.00517667	0.119372
11	0.00416162	0.11959
41	0.00305377	0.119746
208	0.00557477	0.119746
71	0.0051583	0.119751
46	0.00491577	0.119781
3	0.00321561	0.12003
16	0.00560492	0.120085
35	0.00514059	0.120377
63	0.00541124	0.120403
124	0.00617856	0.12157
19	0.00523946	0.121602
32	0.00477373	0.121858
19	0.00631757	0.122009
59	0.00612917	0.122313
22	0.00568396	0.122724
18	0.00344346	0.1228
115	0.00503353	0.123091
25	0.00654	0.12334
115	0.00476998	0.123786
158	0.0060137	0.123828
36	0.00625431	0.123949
41	0.00615179	0.124121
15	0.00516631	0.124545
10	0.00375114	0.124706
70	0.0059417	0.12516
165	0.00615032	0.125202
22	0.0055457	0.125203
19	0.00527724	0.125518
105	0.00402469	0.125678
8	0.00516611	0.126029
63	0.00620879	0.126056
102	0.0053666	0.126245
177	0.00516242	0.126256
165	0.00574877	0.126316
69	0.00614882	0.126597
36	0.00553214	0.126655
247	0.00650838	0.12674
46	0.00541449	0.126762
117	0.00557645	0.127031
9	0.00556094	0.127128
32	0.00516096	0.127625
35	0.00466947	0.127672
68	0.00494051	0.127691
116	0.00558485	0.127723
124	0.00658675	0.128166
10	0.00550998	0.128215
3	0.00634864	0.128291
86	0.00536082	0.128327
90	0.00510006	0.129168
160	0.00549497	0.129176
25	0.00380274	0.129238
209	0.00592628	0.129348
17	0.00613667	0.129414
57	0.00555145	0.129476
63	0.00431319	0.129518
3	0.00419961	0.129764
59	0.00577589	0.129779
11	0.00500885	0.129781
2	0.00542319	0.130383
26	0.0045595	0.131244
29	0.00592306	0.13131
72	0.00523036	0.132048
2	0.00532435	0.132053
56	0.0045492	0.132545
36	0.00507701	0.13257
1	0.00411677	0.132727
27	0.00472516	0.133019
19	0.00634397	0.133041
93	0.00572173	0.133044
63	0.00454322	0.1331
189	0.00549752	0.133196
10	0.0063363	0.133215
75	0.00614457	0.13331
152	0.00566404	0.133436
117	0.00555146	0.133504
156	0.00522447	0.133567
113	0.00666762	0.133842
64	0.00595198	0.134157
3	0.00561742	0.134212
19	0.00563538	0.134333
35	0.0054616	0.134833
27	0.00540976	0.135129
56	0.00519876	0.135165
43	0.00554128	0.135327
9	0.0053224	0.135534
106	0.00582349	0.135534
184	0.00445705	0.135578
226	0.00587488	0.135848
83	0.00327857	0.135997
102	0.00577964	0.136149
63	0.00529257	0.13621
10	0.00641663	0.136652
181	0.00456644	0.137051
64	0.00602903	0.137204
18	0.00570376	0.137557
11	0.00478108	0.137773
19	0.00610453	0.137773
136	0.0038294	0.137786
115	0.00533077	0.13784
124	0.00593756	0.137954
115	0.0057389	0.138032
11	0.00458243	0.138719
117	0.00580559	0.138764
128	0.00519348	0.138865
106	0.00483076	0.138964
80	0.00448973	0.139199
15	0.00484656	0.139324
7	0.00490295	0.139409
22	0.00499526	0.139691
89	0.00557367	0.139709
64	0.00652992	0.139776
19	0.0065443	0.139808
140	0.00622878	0.139811
83	0.00480475	0.140124
10	0.00471015	0.140198
26	0.00470781	0.140323
19	0.00553832	0.140398
116	0.00535043	0.140448
128	0.00568294	0.140753
19	0.00578415	0.140998
32	0.00524575	0.141074
25	0.00552992	0.141116
36	0.00502401	0.141136
132	0.00497283	0.14122
10	0.00325059	0.141484
38	0.00673835	0.141629
117	0.00540848	0.141908
95	0.00492663	0.141938
20	0.00479613	0.141947
119	0.00633655	0.14197
71	0.00582074	0.141976
32	0.00569142	0.142063
36	0.00509316	0.142094
36	0.00584513	0.142297
10	0.00499463	0.142388
93	0.00633389	0.14257
132	0.00639091	0.142601
22	0.00537032	0.142674
10	0.00488664	0.142716
50	0.00534516	0.142739
95	0.00476551	0.142798
19	0.00489795	0.142908
221	0.0046526	0.142985
18	0.00657384	0.143215
153	0.0059265	0.14322
52	0.00552436	0.143221
57	0.00528603	0.143236
71	0.00455466	0.143261
36	0.00651469	0.14358
41	0.00427855	0.143605
83	0.00374835	0.143725
3	0.00536727	0.143818
20	0.00645553	0.14391
1	0.00584565	0.143918
144	0.00545503	0.143988
116	0.00498166	0.144009
82	0.00572568	0.144034
10	0.00537905	0.144218
69	0.00550141	0.144435
51	0.00572312	0.144846
19	0.00616691	0.144931
242	0.00627401	0.144947
36	0.00483412	0.144961
132	0.00572547	0.144973
9	0.00528056	0.145375
2	0.00534994	0.145508
70	0.00542097	0.145617
28	0.00410529	0.145841
83	0.00297716	0.146049
37	0.00497769	0.146267
134	0.0060503	0.146508
13	0.00483042	0.146524
14	0.00445588	0.146576
106	0.0052906	0.14663
157	0.00543017	0.146677
95	0.00544143	0.146715
117	0.00511554	0.146748
70	0.00576499	0.146777
153	0.00560542	0.146787
102	0.00527206	0.147134
189	0.00588829	0.147242
2	0.00555234	0.14729
25	0.00639358	0.147305
12	0.00513251	0.147734
5	0.00487149	0.147738
158	0.00456843	0.147979
45	0.0053795	0.148163
128	0.00454555	0.148204
83	0.00462489	0.148205
37	0.00566618	0.148225
209	0.00455677	0.148743
15	0.0051874	0.148969
116	0.00656603	0.14903
1	0.00539294	0.149277
89	0.00658721	0.14948
160	0.00582359	0.149992
10	0.00491627	0.150015
5	0.00601036	0.150047
119	0.0055071	0.15011
128	0.00535304	0.15022
5	0.00658264	0.150243
51	0.0038589	0.15029
14	0.00443874	0.150389
69	0.00480227	0.150514
6	0.00464545	0.150541
48	0.00506623	0.150549
152	0.00597897	0.150562
50	0.00596899	0.150581
177	0.00574767	0.150583
144	0.00417653	0.150933
64	0.00453215	0.150934
213	0.0049838	0.15094
32	0.00547799	0.151004
46	0.00518165	0.151308
26	0.00521184	0.151387
117	0.00543381	0.151738
45	0.0053243	0.151834
95	0.00578021	0.151984
82	0.0046026	0.151988
89	0.00494166	0.152007
106	0.00543683	0.152044
37	0.00601657	0.152384
41	0.00517277	0.152469
25	0.00395638	0.152553
70	0.00472989	0.152678
50	0.00529235	0.152714
41	0.00576237	0.152749
1	0.00587665	0.152756
28	0.00656999	0.152962
5	0.00565744	0.153017
2	0.00467158	0.153156
106	0.00495419	0.153404
13	0.00434467	0.153545
95	0.00514087	0.153945
41	0.00510512	0.154062
69	0.00476439	0.154265
35	0.00543172	0.1543
1	0.0044733	0.15436
106	0.00457673	0.154377
95	0.00489431	0.154419
8	0.00554342	0.154476
6	0.00622408	0.154604
1	0.00559762	0.154627
41	0.00514207	0.154999
117	0.00569943	0.155132
102	0.00444994	0.155176
213	0.00572593	0.155398
5	0.00500201	0.155633
63	0.00540393	0.155798
153	0.00440194	0.155944
89	0.00616932	0.155977
59	0.00503451	0.1561
134	0.0033973	0.156116
35	0.0056441	0.156156
6	0.00467475	0.156197
9	0.0065089	0.156393
171	0.00364045	0.156649
101	0.00378253	0.156704
3	0.0033896	0.156894
95	0.0055028	0.157064
32	0.00481739	0.157318
3	0.00480565	0.157367
76	0.00428685	0.15784
19	0.00488433	0.158013
101	0.00627767	0.158094
39	0.00583851	0.158175
10	0.00543198	0.158291
13	0.0046898	0.158371
13	0.00507383	0.158655
19	0.00586143	0.15884
26	0.0040252	0.158876
95	0.00575929	0.158901
221	0.00638036	0.158951
70	0.00560901	0.159197
19	0.00448489	0.159559
6	0.00532258	0.159668
35	0.00577985	0.159738
13	0.00427216	0.159979
165	0.00536739	0.160039
9	0.00565707	0.160443
2	0.00662097	0.160524
36	0.00519116	0.160549
72	0.00567611	0.160604
156	0.0051599	0.160943
42	0.00580846	0.160954
19	0.00508273	0.161049
221	0.00559621	0.161058
36	0.00576896	0.161087
93	0.00595649	0.161108
22	0.00519691	0.161329
2	0.00517047	0.161384
46	0.00488564	0.16149
36	0.00521814	0.161503
7	0.00517114	0.161621
36	0.00548503	0.161687
39	0.00489453	0.161864
35	0.00579462	0.161979
15	0.00620311	0.162112
57	0.00604965	0.162159
3	0.00488743	0.162176
13	0.00441766	0.162319
64	0.00520752	0.162325
22	0.0049838	0.162389
6	0.00552367	0.162601
128	0.00513886	0.162796
36	0.00523538	0.162851
128	0.00511966	0.16327
36	0.00533322	0.163334
69	0.00547369	0.163424
13	0.00315947	0.163517
44	0.00554962	0.163569
64	0.00523015	0.163597
8	0.00466453	0.163714
5	0.00564946	0.163721
1	0.00467848	0.163727
63	0.00499249	0.163782
64	0.00470107	0.163841
9	0.00579503	0.163885
45	0.00525317	0.163963
7	0.00613272	0.164154
17	0.00371731	0.164209
2	0.00456227	0.164383
13	0.00421336	0.164562
117	0.00539557	0.164856
90	0.00467909	0.165133
25	0.00563176	0.16533
36	0.00518249	0.165402
128	0.00370148	0.165488
117	0.00521086	0.1656
95	0.00556345	0.165709
163	0.00612042	0.165804
28	0.00524738	0.165918
209	0.00643228	0.165928
133	0.00582243	0.165999
57	0.00620985	0.166154
36	0.00516242	0.166181
11	0.00433699	0.166316
37	0.00574343	0.166335
3	0.00549751	0.166431
37	0.00550714	0.166444
50	0.00609025	0.166532
1	0.00569336	0.166538
129	0.00613664	0.166586
64	0.00495611	0.16668
86	0.00491765	0.16678
15	0.0052585	0.166916
70	0.00566279	0.166994
91	0.00584599	0.166997
69	0.00466543	0.167044
45	0.00538239	0.167219
168	0.00430985	0.167262
6	0.00435684	0.167295
116	0.00515263	0.167527
50	0.00578971	0.16779
70	0.00537859	0.16783
63	0.00522235	0.167909
37	0.00653219	0.16795
128	0.00549579	0.16817
89	0.00457504	0.168185
63	0.00566608	0.168209
36	0.00586087	0.168243
14	0.00657072	0.168968
72	0.00589788	0.169235
59	0.00536231	0.16924
9	0.00596219	0.169294
19	0.00523911	0.169444
1	0.00446225	0.169512
372	0.0041499	0.169598
89	0.00535276	0.169609
2	0.00622629	0.169665
42	0.00503668	0.169766
71	0.00480635	0.170029
35	0.0042281	0.170076
67	0.00622919	0.170115
2	0.00479667	0.170173
2	0.00557706	0.170303
71	0.0048226	0.170366
1	0.00606178	0.17038
22	0.00570473	0.170443
165	0.00484025	0.170483
13	0.00501815	0.1705
70	0.00386357	0.170699
19	0.00498839	0.170727
275	0.00606176	0.170967
13	0.00531293	0.171068
64	0.00598823	0.171171
32	0.00539614	0.171272
171	0.00565274	0.17129
93	0.00670895	0.171462
63	0.00532054	0.171519
28	0.00464303	0.171546
156	0.00467113	0.171617
37	0.00576161	0.171845
70	0.00590046	0.171892
129	0.00510617	0.171993
14	0.00412507	0.172016
10	0.00334086	0.172053
95	0.00545542	0.172203
22	0.00532888	0.172214
25	0.0063956	0.172264
64	0.00615333	0.172345
75	0.00528542	0.172351
2	0.00554851	0.17241
102	0.00528859	0.172544
126	0.00367094	0.172619
2	0.00586273	0.172652
19	0.00571934	0.172706
7	0.00607577	0.172706
32	0.00499775	0.172716
43	0.00572659	0.172848
153	0.00537611	0.17294
153	0.00508242	0.172976
70	0.00436074	0.173245
10	0.00569257	0.17354
63	0.00492452	0.173643
71	0.00529954	0.173654
19	0.00549862	0.173655
117	0.00575092	0.173726
8	0.00439426	0.173804
63	0.00619545	0.173855
26	0.00463977	0.173931
44	0.00546757	0.174011
64	0.00538889	0.174243
76	0.00458092	0.174329
60	0.0048356	0.174456
96	0.00542542	0.174608
129	0.00517235	0.174633
6	0.00432133	0.174782
117	0.00612958	0.174799
63	0.00562653	0.174884
5	0.00525569	0.175114
71	0.00455132	0.175122
83	0.00540394	0.175226
9	0.0047835	0.175309
172	0.00530603	0.175357
333	0.00455444	0.175378
125	0.00478111	0.175452
13	0.00621031	0.175611
86	0.00474303	0.175959
70	0.00561154	0.176041
3	0.00536225	0.176397
22	0.00581808	0.176522
2	0.00539214	0.176916
78	0.00507025	0.176947
63	0.00535644	0.176957
3	0.00575138	0.176971
3	0.00462924	0.176998
30	0.00608562	0.177141
132	0.00612533	0.177172
36	0.00623885	0.177244
69	0.00573275	0.177335
57	0.00610455	0.177562
39	0.00324926	0.177807
59	0.00505452	0.177833
59	0.00442404	0.177846
136	0.00523229	0.177915
125	0.00623237	0.177927
26	0.00456124	0.177975
116	0.00598585	0.177995
19	0.00582382	0.178038
9	0.00539757	0.178182
32	0.00475641	0.178368
13	0.00623804	0.178473
50	0.00540631	0.178527
63	0.00402137	0.178536
70	0.00503935	0.178563
156	0.00649361	0.178624
7	0.00596955	0.178792
26	0.00630856	0.178803
159	0.00445311	0.178839
45	0.00554354	0.178934
6	0.00500072	0.179031
69	0.00604779	0.179158
45	0.00469825	0.179305
106	0.00480653	0.179457
117	0.00486346	0.179579
67	0.00617752	0.179604
172	0.00476448	0.179767
32	0.00477907	0.179772
75	0.00452266	0.179839
158	0.00588785	0.179846
69	0.00511856	0.18003
34	0.0058166	0.180056
209	0.00526623	0.180212
69	0.00553468	0.180269
46	0.00492455	0.180472
102	0.00565901	0.18053
51	0.00485614	0.180534
2	0.00425682	0.180689
89	0.00529712	0.180745
125	0.00583134	0.180821
3	0.00633735	0.180886
89	0.00501717	0.180993
9	0.00466511	0.181449
8	0.00456235	0.181465
26	0.00447676	0.18147
22	0.00490295	0.18152
125	0.00544209	0.18163
144	0.00517456	0.181694
16	0.00608677	0.181776
64	0.00454304	0.181781
3	0.00640932	0.181862
25	0.00614173	0.181881
3	0.00508694	0.181914
19	0.00631495	0.181921
3	0.00523851	0.181923
83	0.00559482	0.181984
63	0.00572425	0.181988
64	0.00636629	0.182146
2	0.00518989	0.182403
27	0.0043211	0.182546
36	0.00563022	0.182701
102	0.00480271	0.182722
64	0.00659754	0.182926
46	0.00485837	0.182956
10	0.00641573	0.183255
89	0.00507847	0.183279
18	0.00487449	0.1833
19	0.00425753	0.183322
46	0.00569832	0.183355
89	0.00620297	0.183375
69	0.0055884	0.183382
29	0.00578144	0.18343
165	0.00593418	0.183527
57	0.0054787	0.183624
90	0.00640371	0.183741
139	0.00483772	0.183744
165	0.00492992	0.183773
46	0.00452018	0.183864
64	0.00558608	0.184001
82	0.00578958	0.184029
22	0.00631089	0.184031
59	0.00539304	0.184044
70	0.00489891	0.184053
128	0.00603848	0.184065
13	0.00416242	0.18417
42	0.0051065	0.184192
159	0.00470751	0.184285
72	0.0055031	0.184422
83	0.00398681	0.184584
63	0.00538871	0.184657
9	0.00605576	0.184738
46	0.00547797	0.1848
38	0.00581776	0.184827
46	0.00534494	0.18487
114	0.00412546	0.185042
78	0.0057831	0.185179
152	0.00541769	0.18533
59	0.00423666	0.185362
30	0.00544447	0.185856
3	0.00548209	0.185909
127	0.00412137	0.185963
10	0.00355237	0.185979
102	0.00590045	0.186125
32	0.00473594	0.186147
43	0.00615245	0.186344
25	0.00604337	0.186381
35	0.00556772	0.186574
46	0.00568043	0.18677
36	0.00669234	0.187017
27	0.00322648	0.187246
25	0.00644104	0.187389
72	0.00541498	0.187398
119	0.00439434	0.187729
117	0.00557763	0.187775
226	0.00517146	0.187783
28	0.00567066	0.187849
96	0.0058845	0.187876
18	0.00526276	0.187926
30	0.00556914	0.18814
15	0.00497549	0.188284
386	0.0057438	0.18834
386	0.00644429	0.18834
69	0.00477092	0.188351
106	0.00501857	0.188367
19	0.00492522	0.188479
107	0.00319933	0.18848
7	0.00673877	0.188501
2	0.00523282	0.188563
13	0.00459435	0.188817
57	0.00559767	0.18888
36	0.0056527	0.1889
17	0.00540056	0.188908
2	0.00520376	0.188914
26	0.00529141	0.189105
119	0.0045573	0.189173
82	0.00575329	0.189186
46	0.00526635	0.189187
59	0.00500855	0.189223
153	0.00428753	0.189415
22	0.00568097	0.189504
1	0.00546118	0.189532
1	0.00585021	0.189567
26	0.00506577	0.189604
34	0.00656591	0.189623
152	0.00468984	0.189716
95	0.00472044	0.189723
160	0.00558589	0.189763
165	0.00532628	0.189787
12	0.00531127	0.189806
36	0.00514026	0.189889
6	0.00529439	0.189925
18	0.00528459	0.189946
95	0.00499037	0.190034
19	0.0046533	0.190082
30	0.00546824	0.19016
57	0.00553821	0.190235
37	0.00631827	0.190257
86	0.00498078	0.190432
1	0.00629164	0.190475
152	0.00475669	0.190508
324	0.00516341	0.190612
6	0.0056128	0.190735
25	0.00638965	0.190767
19	0.00550901	0.190845
75	0.00674327	0.190911
25	0.00572344	0.190913
46	0.00531316	0.191139
209	0.00523194	0.191213
18	0.0059973	0.191272
15	0.00569635	0.191345
86	0.00551267	0.191435
56	0.00540988	0.191452
2	0.0049782	0.191456
129	0.0037054	0.19147
45	0.00499335	0.191537
5	0.00623088	0.191576
59	0.00498199	0.191746
9	0.00581802	0.191851
12	0.00570119	0.191944
35	0.00652712	0.192009
41	0.00536042	0.192257
189	0.00658222	0.192262
8	0.00410824	0.192339
63	0.00518658	0.192405
92	0.00584339	0.192484
64	0.00628267	0.192494
105	0.0053478	0.192615
46	0.00538183	0.192616
95	0.00576264	0.1927
63	0.00521756	0.192702
117	0.00600971	0.192703
124	0.00668492	0.192761
230	0.00488565	0.192849
36	0.00437849	0.192887
10	0.00604834	0.192936
89	0.00456997	0.192994
69	0.00567293	0.193016
71	0.0060437	0.193083
82	0.00543575	0.193139
82	0.0063604	0.193157
116	0.00636781	0.193183
177	0.0050339	0.193219
38	0.00584326	0.193237
57	0.00553373	0.193259
19	0.00484455	0.193303
63	0.00458581	0.193324
164	0.00513919	0.193339
36	0.00534268	0.193427
160	0.00504024	0.193549
51	0.00474701	0.193675
76	0.00474359	0.193706
3	0.00508965	0.193719
63	0.00491089	0.193724
3	0.00490279	0.193743
185	0.005709	0.193908
41	0.00512855	0.193911
209	0.00532121	0.194033
95	0.00477531	0.194083
86	0.00489243	0.194334
64	0.00548938	0.194449
49	0.00523709	0.194525
31	0.00320153	0.194539
172	0.0050417	0.194636
7	0.00428744	0.195056
70	0.00496273	0.195159
26	0.00431949	0.195399
46	0.00533124	0.195426
36	0.00667494	0.19547
42	0.00439221	0.195478
114	0.00580819	0.19553
95	0.00530948	0.195605
63	0.00554971	0.195716
69	0.00607102	0.195795
2	0.0056698	0.195842
36	0.00590659	0.195855
59	0.00585035	0.195978
72	0.00434203	0.196154
22	0.00508908	0.196349
3	0.00524266	0.196625
20	0.00594696	0.196691
46	0.00545626	0.196697
117	0.00568593	0.196701
71	0.0042675	0.196719
63	0.00612686	0.196765
59	0.00561812	0.196777
161	0.00480098	0.196821
69	0.00577634	0.197083
247	0.00574864	0.197152
29	0.0047187	0.197175
19	0.00658925	0.197183
164	0.00514056	0.19719
13	0.0051119	0.197404
160	0.00532897	0.197439
52	0.00473256	0.197477
37	0.00621188	0.197538
73	0.00508749	0.197554
36	0.00531834	0.19757
90	0.00616728	0.197595
93	0.00522158	0.197755
52	0.00491491	0.19788
3	0.00603751	0.197884
70	0.00432153	0.197923
36	0.00453712	0.198141
44	0.00625766	0.198258
95	0.00535957	0.198364
102	0.00603035	0.198498
115	0.00526772	0.19855
16	0.00578383	0.198562
95	0.00550411	0.198571
70	0.00619327	0.198769
64	0.00617064	0.198808
89	0.00479287	0.198835
63	0.00516545	0.198898
76	0.00415822	0.199039
116	0.00390512	0.199136
83	0.00559478	0.199208
152	0.00640377	0.199271
69	0.00499825	0.199286
6	0.00556806	0.199312
134	0.00585719	0.199382
177	0.00501693	0.199431
46	0.00503046	0.199434
105	0.00590636	0.199466
19	0.0061161	0.199652
82	0.00590557	0.199672
139	0.00452348	0.199796
35	0.00522666	0.199831
117	0.00495647	0.199886
36	0.00524839	0.20002
226	0.00543642	0.200028
28	0.00501109	0.200047
40	0.00498372	0.200164
8	0.00577809	0.200179
35	0.00488761	0.20021
36	0.00556668	0.200236
19	0.00552003	0.20026
2	0.00532614	0.200313
19	0.00520139	0.200484
35	0.00558479	0.20064
86	0.00476392	0.200798
63	0.00580929	0.200805
1	0.00492267	0.200839
168	0.00488851	0.200887
25	0.00429697	0.200949
19	0.00520256	0.200972
9	0.00514811	0.201027
40	0.0050909	0.201148
117	0.00500941	0.201215
35	0.00512722	0.2013
122	0.00503627	0.201393
5	0.00466582	0.201499
22	0.00492139	0.201521
177	0.00488833	0.201572
59	0.00565322	0.20161
82	0.00544411	0.201683
67	0.00620192	0.201725
13	0.00510028	0.201777
42	0.00459183	0.20202
36	0.00485476	0.202206
50	0.00638591	0.202275
71	0.0041974	0.202354
57	0.00544591	0.202385
19	0.00614309	0.202407
36	0.00516263	0.20245
19	0.00496881	0.20248
18	0.00539268	0.202593
19	0.00572105	0.202742
92	0.00605529	0.202809
26	0.00626966	0.202857
134	0.00622785	0.202891
9	0.00468762	0.202923
204	0.00516109	0.203026
20	0.00648119	0.203104
29	0.00598935	0.203134
161	0.00445336	0.203183
132	0.00641044	0.20326
136	0.00506092	0.203323
57	0.00516486	0.203344
41	0.00498731	0.20335
10	0.00580948	0.203356
28	0.00560938	0.203377
19	0.00592701	0.203537
45	0.00516384	0.203543
86	0.00628143	0.203578
19	0.00574283	0.20376
117	0.00489881	0.203768
30	0.00509485	0.203806
94	0.00406216	0.203856
86	0.00513502	0.203866
89	0.00516456	0.203916
59	0.00596317	0.203938
70	0.00443667	0.204013
1	0.00453628	0.204039
36	0.00450579	0.204082
9	0.00510598	0.204111
63	0.004987	0.204138
226	0.00546087	0.204169
69	0.00516381	0.204236
64	0.00431616	0.20424
64	0.00558986	0.204254
54	0.00415299	0.204363
52	0.00459268	0.204387
339	0.00513814	0.204401
59	0.00533165	0.204633
69	0.00586892	0.204647
9	0.0059281	0.204678
69	0.00451979	0.204692
71	0.00406195	0.20475
56	0.00440148	0.204811
71	0.00553656	0.204988
40	0.00458393	0.205059
70	0.00489996	0.20511
70	0.00520144	0.20515
48	0.00436509	0.205369
41	0.00587556	0.205422
46	0.00586912	0.205434
19	0.00543858	0.205487
36	0.00593314	0.205493
70	0.00435672	0.20558
106	0.00496281	0.205709
45	0.00458513	0.205772
29	0.00550076	0.205827
156	0.00517603	0.205862
226	0.00546627	0.205943
95	0.00614404	0.205947
20	0.00417161	0.205958
37	0.005711	0.205992
78	0.00500175	0.206415
152	0.00652254	0.206532
32	0.00514574	0.206593
14	0.00517158	0.20662
7	0.00445558	0.206655
8	0.00670231	0.20674
25	0.00660403	0.206817
35	0.00484869	0.20698
25	0.00668241	0.20709
51	0.00518759	0.207179
35	0.00543281	0.207219
18	0.00543064	0.2073
2	0.00536562	0.207347
160	0.00545017	0.207397
64	0.00435816	0.207416
57	0.00520782	0.207555
20	0.00422172	0.207676
9	0.00559213	0.207735
11	0.00540261	0.207778
70	0.00557044	0.207925
5	0.00601241	0.20797
37	0.00496772	0.208016
64	0.00585825	0.208035
113	0.00641498	0.208061
46	0.00505029	0.208347
80	0.00652914	0.208385
71	0.0049712	0.208604
22	0.00572859	0.208612
63	0.00544815	0.208622
102	0.00560787	0.208625
57	0.00537842	0.20872
124	0.0063298	0.208836
25	0.00462976	0.208859
26	0.00472385	0.208945
7	0.00512241	0.208945
76	0.0047311	0.208974
2	0.00496528	0.209231
95	0.00607618	0.209361
153	0.00457847	0.209362
5	0.00545507	0.209426
50	0.00520701	0.209442
35	0.00532946	0.209463
30	0.00579439	0.209501
36	0.00451566	0.209522
5	0.0056828	0.209525
102	0.00580216	0.209527
25	0.00538121	0.209556
45	0.00554421	0.209571
24	0.0054074	0.209606
6	0.00548897	0.209666
5	0.00589505	0.209833
9	0.00524701	0.209867
69	0.00559397	0.209908
27	0.00612078	0.209912
25	0.00655592	0.209949
[truncated: 28,109 more rows]

## Sheet: Sheet2
scaff	cord	avgMAF	FST
scaf10	800001	0.00691486	-0.0253611
scaf43	5850001	0.00693521	0.0121738
scaf10	1150001	0.00758137	0.021965
scaf105	1025001	0.00906699	0.0296777
scaf10	825001	0.0070577	0.0381417
scaf64	1900001	0.00694246	0.041958
scaf25	10425001	0.0071942	0.0452484
scaf25	10600001	0.00785186	0.0462401
scaf10	1000001	0.00810652	0.0590478
scaf10	850001	0.00740665	0.0616824
scaf11	1550001	0.00268474	0.0691499
scaf36	3350001	0.00704675	0.0771594
scaf25	11800001	0.00793367	0.0796864
scaf14	17725001	0.00240397	0.080053
scaf10	1375001	0.00698676	0.0811087
scaf169	225001	0.00744245	0.0845196
scaf50	1500001	0.00721394	0.0870106
scaf43	5775001	0.00707832	0.0879855
scaf54	700001	0.00724317	0.0961168
scaf50	1650001	0.00719207	0.0970897
scaf38	2725001	0.00696127	0.0986897
scaf25	12000001	0.00718879	0.0995162
scaf248	200001	0.00700776	0.101249
scaf54	725001	0.00798782	0.102019
scaf54	1775001	0.00259785	0.102365
scaf65	3600001	0.0022504	0.636706
scaf287	100001	0.00264579	0.637962
scaf313	50001	0.00259721	0.646813
scaf26	6425001	0.00210119	0.649004
scaf259	200001	0.00247208	0.653885
scaf45	5700001	0.0022495	0.654896
scaf15	6450001	0.00247734	0.663464
scaf130	625001	0.00204183	0.669297
scaf311	75001	0.00197583	0.673864
scaf24	10275001	0.00220777	0.674908
scaf10	23050001	0.00239421	0.679571
scaf24	10250001	0.00164984	0.6812
scaf45	5900001	0.00172603	0.683207
scaf110	1500001	0.00239566	0.684391
scaf112	1500001	0.00237361	0.68607
scaf24	10475001	0.00242783	0.686701
scaf38	475001	0.00218222	0.692443
scaf40	1375001	0.00201763	0.696961
scaf110	1550001	0.00221585	0.699931
scaf62	475001	0.00699413	0.705156
scaf38	675001	0.00217339	0.706018
scaf51	4175001	0.00258225	0.70961
scaf20	14575001	0.00222964	0.712803
scaf311	50001	0.00200198	0.713819
scaf10	23075001	0.00257227	0.714308
scaf17	850001	0.00265874	0.719403
scaf40	1350001	0.00199181	0.722572
scaf293	100001	0.0025595	0.723022
scaf45	5875001	0.0019547	0.727645
scaf38	650001	0.0019226	0.738643
scaf38	1125001	0.00203473	0.738966
scaf17	875001	0.00251211	0.739756
scaf10	23100001	0.0023133	0.742756
scaf62	750001	0.00270956	0.77359
scaf38	1150001	0.00250476	0.77425
scaf11	4900001	0.00190096	0.779663
scaf130	400001	0.00215221	0.813565
scaf26	6400001	0.00211539	0.821238
scaf45	6525001	0.00175082	0.823058
scaf45	6700001	0.00221635	0.836923
scaf45	6575001	0.00173489	0.857987
scaf45	6600001	0.00162355	0.872704
scaf45	6550001	0.00159223	0.880644
scaf45	6675001	0.00166141	0.902086
scaf45	6650001	0.00177536	0.910568
scaf45	6625001	0.00165769	0.912092
scaf11	4800001	0.00450542	-0.0644655
scaf50	1325001	0.00537167	-0.0506708
scaf85	1450001	0.00490368	-0.0137692
scaf37	1275001	0.00585781	-0.0102218
scaf25	8375001	0.00681596	-0.00573329
scaf25	8400001	0.00587164	-0.00307143
scaf165	75001	0.0048034	-0.00285091
scaf116	775001	0.00514868	0.00271457
scaf153	300001	0.00471123	0.0039011
scaf169	275001	0.00563706	0.00408874
scaf63	1525001	0.00647532	0.00432636
scaf119	525001	0.00413827	0.00740893
scaf36	3625001	0.0046482	0.00862679
scaf25	11150001	0.00516943	0.0140499
scaf82	2925001	0.00588431	0.0154667
scaf144	800001	0.00537449	0.0157524
scaf163	1	0.00559269	0.0169877
scaf19	5075001	0.00609811	0.0178679
scaf169	250001	0.00629242	0.0179028
scaf16	13625001	0.00458331	0.0190112
scaf102	1300001	0.0056446	0.0215805
scaf64	1875001	0.00511201	0.0249071
scaf156	200001	0.00589427	0.0260031
scaf50	1300001	0.00604791	0.0275666
scaf128	225001	0.00596163	0.0276939
scaf26	300001	0.00474976	0.0289294
scaf161	275001	0.00572811	0.0314731
scaf35	1850001	0.00555501	0.0320357
scaf25	10375001	0.0060252	0.0328074
scaf157	350001	0.0045593	0.0330365
scaf153	275001	0.00438026	0.0331541
scaf117	50001	0.00587438	0.0337428
scaf82	950001	0.0054776	0.0344482
scaf20	8175001	0.00470528	0.0347769
scaf171	325001	0.0051076	0.0351819
scaf17	14300001	0.0034263	0.0355238
scaf10	2225001	0.00577567	0.0379736
scaf208	400001	0.00670742	0.039631
scaf69	2000001	0.00681806	0.040041
scaf115	325001	0.00530372	0.0429635
scaf35	950001	0.0055779	0.0441211
scaf116	800001	0.00495915	0.0446124
scaf36	3325001	0.00540828	0.0449594
scaf82	1250001	0.00506222	0.0468052
scaf25	11125001	0.00678648	0.0470185
scaf82	875001	0.00593132	0.0480284
scaf10	775001	0.00473984	0.0480424
scaf152	100001	0.00501002	0.0486656
scaf128	50001	0.00607082	0.0489559
scaf38	2750001	0.00573824	0.0490016
scaf144	775001	0.00656982	0.0499719
scaf153	375001	0.00528732	0.0515071
scaf64	1250001	0.00469801	0.0516747
scaf153	100001	0.00452488	0.0521965
scaf19	5175001	0.00550305	0.0524722
scaf25	11900001	0.00630017	0.0525381
scaf17	14125001	0.00621052	0.0535678
scaf23	12725001	0.00544057	0.053692
scaf63	1500001	0.00678965	0.053724
scaf37	1300001	0.00572224	0.0544077
scaf116	750001	0.00564517	0.0548865
scaf134	475001	0.00648364	0.055074
scaf160	100001	0.00514503	0.0552102
scaf82	1125001	0.00680531	0.056582
scaf153	350001	0.00553987	0.0571431
scaf82	900001	0.00647201	0.05717
scaf128	75001	0.00607777	0.0588359
scaf82	925001	0.00652599	0.0588771
scaf10	1750001	0.00647186	0.0608945
scaf38	4150001	0.00582067	0.0615624
scaf67	3500001	0.00602727	0.0619264
scaf25	10625001	0.00633117	0.0624715
scaf64	1325001	0.00502427	0.0632092
scaf14	17750001	0.00546148	0.0642522
scaf124	300001	0.00590227	0.0652689
scaf161	250001	0.00620417	0.065304
scaf82	1150001	0.00587205	0.0659283
scaf144	700001	0.00642651	0.0660643
scaf14	12150001	0.00481157	0.0681074
scaf82	1050001	0.00656777	0.0687499
scaf25	8225001	0.00596838	0.0691917
scaf124	1000001	0.00605139	0.0693076
scaf35	1750001	0.00578237	0.069851
scaf115	525001	0.00429168	0.0700302
scaf10	1350001	0.00618948	0.0700822
scaf86	1225001	0.00595901	0.070599
scaf10	1250001	0.0048493	0.0707154
scaf171	350001	0.00602637	0.0711684
scaf11	1575001	0.00347508	0.0714852
scaf35	1325001	0.00573416	0.0716002
scaf102	1850001	0.00561111	0.071742
scaf95	1025001	0.00519804	0.0726401
scaf153	325001	0.00512945	0.0730983
scaf115	550001	0.00519552	0.0745238
scaf35	1900001	0.00541355	0.0752454
scaf50	1175001	0.00617972	0.0752953
scaf82	1075001	0.00596439	0.0753398
scaf10	875001	0.00659542	0.0755189
scaf184	525001	0.00429137	0.0759238
scaf160	400001	0.00530102	0.0761201
scaf52	600001	0.00611927	0.0767657
scaf63	3300001	0.00502958	0.0768134
scaf46	325001	0.00466948	0.0772883
scaf28	75001	0.00475673	0.0783229
scaf64	1850001	0.00493435	0.0786758
scaf64	1275001	0.00426334	0.0787633
scaf212	125001	0.00469016	0.0788138
scaf50	1525001	0.00581962	0.0789101
scaf36	3550001	0.00532073	0.0792113
scaf17	14100001	0.00610716	0.079288
scaf89	2550001	0.00640412	0.079306
scaf51	1250001	0.00513378	0.0794143
scaf25	8350001	0.00642436	0.0796595
scaf171	200001	0.00605609	0.0804091
scaf129	1	0.00482813	0.0807132
scaf116	100001	0.00545502	0.081983
scaf116	725001	0.0059151	0.0825109
scaf10	275001	0.0059305	0.082959
scaf28	4550001	0.00655476	0.0834652
scaf89	1650001	0.0050204	0.0840252
scaf12	20850001	0.00483338	0.0842015
scaf72	2800001	0.00609686	0.0843169
scaf116	125001	0.00526256	0.0849656
scaf49	875001	0.00542075	0.0852441
scaf11	4775001	0.00355311	0.0854275
scaf90	1800001	0.00511371	0.0856581
scaf50	1025001	0.00488517	0.0858945
scaf69	1975001	0.00542601	0.0864808
scaf119	1	0.00551486	0.0865507
scaf25	11750001	0.0060201	0.0869564
scaf64	1650001	0.00538203	0.0876332
scaf11	3450001	0.00427047	0.087939
scaf38	2700001	0.00682859	0.0885652
scaf19	4075001	0.00554424	0.0885874
scaf25	10050001	0.00644537	0.089183
scaf163	675001	0.00626569	0.0895671
scaf26	325001	0.0045633	0.0900538
scaf116	75001	0.00472848	0.0922655
scaf127	1250001	0.00600028	0.0929637
scaf37	1025001	0.00536924	0.0937775
scaf89	825001	0.00477942	0.0939307
scaf144	750001	0.00556337	0.0944823
scaf152	250001	0.00533184	0.0947425
scaf14	17775001	0.00515632	0.0949125
scaf204	50001	0.00580527	0.0950654
scaf35	1825001	0.00573146	0.0961667
scaf45	275001	0.0052307	0.0965435
scaf35	1775001	0.00553983	0.0969353
scaf89	1675001	0.00532782	0.0969415
scaf157	675001	0.00642577	0.097001
scaf53	1950001	0.00546956	0.0975917
scaf36	3450001	0.0055875	0.0977587
scaf26	3550001	0.00609141	0.0981802
scaf64	1375001	0.00601282	0.0982772
scaf128	325001	0.00603522	0.0988518
scaf116	1225001	0.00459303	0.098923
scaf21	1400001	0.00504077	0.0991405
scaf37	1050001	0.00599366	0.0991816
scaf213	50001	0.0051107	0.0991859
scaf25	11725001	0.0065765	0.0995666
scaf177	500001	0.00588271	0.0995931
scaf248	225001	0.00628273	0.0997809
scaf82	2700001	0.00555471	0.0999628
scaf50	1375001	0.00636431	0.100612
scaf157	700001	0.00653316	0.100727
scaf20	13175001	0.00462552	0.100912
scaf101	1225001	0.0053385	0.101014
scaf82	1175001	0.00597009	0.101433
scaf10	1025001	0.00533458	0.101721
scaf50	825001	0.00663871	0.102898
scaf50	1275001	0.00583892	0.103566
scaf115	500001	0.00490318	0.103935
scaf64	1300001	0.00594187	0.104442
scaf169	600001	0.0056556	0.10475
scaf171	375001	0.0060969	0.10483
scaf57	3700001	0.00533999	0.106125
scaf184	500001	0.00454678	0.106154
scaf27	2475001	0.00569501	0.10636
scaf10	1275001	0.00529974	0.106669
scaf86	1300001	0.00506294	0.106824
scaf25	9800001	0.00649302	0.106926
scaf50	75001	0.00567549	0.10717
scaf115	475001	0.00378567	0.107958
scaf128	250001	0.00631083	0.107977
scaf124	450001	0.00487313	0.108236
scaf72	2825001	0.00478468	0.108407
scaf86	725001	0.00540187	0.108651
scaf89	1625001	0.00897954	0.11602
scaf157	650001	0.00736297	0.116389
scaf25	11700001	0.00689677	0.116671
scaf18	10600001	0.00710646	0.118898
scaf25	12450001	0.00733132	0.120709
scaf25	12550001	0.00711262	0.121332
scaf25	10450001	0.00696848	0.121741
scaf54	675001	0.00685164	0.125383
scaf221	300001	0.00747979	0.126567
scaf20	7600001	0.00971882	0.129281
scaf10	1050001	0.00688738	0.129955
scaf10	1125001	0.00691288	0.13196
scaf25	11875001	0.00819924	0.132519
scaf18	10700001	0.00808015	0.134129
scaf18	10675001	0.00726184	0.134602
scaf242	275001	0.0069293	0.134949
scaf25	11050001	0.00719061	0.13711
scaf10	1075001	0.00757702	0.143478
scaf247	125001	0.00685132	0.150605
scaf25	12475001	0.0114373	0.154066
scaf129	50001	0.00773487	0.155998
scaf165	675001	0.00163496	0.156603
scaf62	1950001	0.00776131	0.156988
scaf73	2175001	0.00769126	0.15862
scaf242	225001	0.00847626	0.164269
scaf10	1300001	0.00733678	0.16884
scaf25	11850001	0.00800104	0.170775
scaf10	1100001	0.00699749	0.175472
scaf211	25001	0.00695874	0.178754
scaf18	11200001	0.00761923	0.178821
scaf63	300001	0.0070613	0.184027
scaf157	400001	0.0088406	0.185298
scaf28	9750001	0.00807666	0.185496
scaf25	12500001	0.00793645	0.187337
scaf35	1300001	0.00695935	0.188244
scaf25	10475001	0.00855594	0.190883
scaf82	475001	0.00689571	0.196199
scaf157	725001	0.00723925	0.196584
scaf309	1	0.00200497	0.19738
scaf25	12525001	0.0074599	0.197669
scaf10	575001	0.00230063	0.199635
scaf95	175001	0.0093668	0.203294
scaf54	750001	0.00704148	0.205917
scaf12	20775001	0.00709735	0.206203
scaf25	12325001	0.00208948	0.209491
scaf200	150001	0.00713288	0.211183
scaf25	12650001	0.00727053	0.211444
scaf84	2500001	0.00689951	0.211908
scaf18	10925001	0.00702313	0.212783
scaf80	1775001	0.00208015	0.214855
scaf38	2650001	0.00699663	0.218342
scaf52	1	0.00248554	0.219326
scaf10	1850001	0.00720695	0.22236
scaf127	550001	0.00706491	0.223387
scaf28	5525001	0.00213138	0.223746
scaf14	4675001	0.00839454	0.22578
scaf10	1600001	0.00749048	0.226465
scaf90	1300001	0.00838577	0.227657
scaf144	575001	0.00686141	0.230691
scaf125	375001	0.00236613	0.234136
scaf247	175001	0.00760407	0.234672
scaf57	1	0.00180857	0.235773
scaf125	975001	0.0073544	0.236143
scaf37	225001	0.00689767	0.23758
scaf19	8675001	0.00913045	0.23778
scaf57	4975001	0.00953671	0.24007
scaf25	12075001	0.00765376	0.240708
scaf50	425001	0.00687571	0.24074
scaf127	50001	0.00776662	0.242489
scaf63	325001	0.00685837	0.24458
scaf83	2900001	0.00247353	0.24506
scaf213	350001	0.00810916	0.245851
scaf25	12175001	0.00756307	0.246805
scaf27	5975001	0.00747619	0.250198
scaf140	550001	0.00690906	0.251561
scaf10	325001	0.00693957	0.252464
scaf82	450001	0.00786603	0.252629
scaf127	675001	0.00689673	0.253183
scaf10	1875001	0.00744496	0.255877
scaf46	425001	0.00739411	0.256344
scaf127	625001	0.0073036	0.257169
scaf105	1350001	0.00736112	0.259495
scaf19	4575001	0.0131391	0.260029
scaf96	700001	0.00266805	0.260065
scaf157	750001	0.00690475	0.260086
scaf69	2075001	0.00704901	0.260277
scaf152	475001	0.00713735	0.262281
scaf38	5575001	0.00218329	0.262758
scaf194	200001	0.00689565	0.264123
scaf127	600001	0.00687558	0.269174
scaf28	5500001	0.00204255	0.269188
scaf194	425001	0.0072413	0.270258
scaf158	250001	0.0071012	0.270998
scaf43	5875001	0.00958063	0.271338
scaf82	775001	0.00734358	0.274175
scaf127	650001	0.00698773	0.274758
scaf193	175001	0.00863867	0.274933
scaf19	4775001	0.00696832	0.275683
scaf124	250001	0.00686561	0.278009
scaf11	3575001	0.00226288	0.279687
scaf25	9075001	0.00697445	0.28067
scaf28	5450001	0.00260607	0.280789
scaf109	100001	0.00720643	0.281875
scaf10	2100001	0.00707656	0.282502
scaf172	575001	0.00686902	0.283288
scaf20	150001	0.00742039	0.284164
scaf10	925001	0.00712426	0.290798
scaf81	3350001	0.0074611	0.29201
scaf20	2250001	0.00690709	0.292906
scaf101	1750001	0.00690742	0.294137
scaf28	9450001	0.00697021	0.294819
scaf37	125001	0.00732207	0.29491
scaf82	700001	0.0075176	0.295185
scaf55	75001	0.124359	0.302586
scaf104	250001	0.00263103	0.302589
scaf82	725001	0.00893791	0.304206
scaf109	75001	0.00909731	0.304537
scaf194	350001	0.00686717	0.304803
scaf69	3975001	0.00748914	0.305507
scaf63	2200001	0.00684553	0.306066
scaf36	2425001	0.00700594	0.306566
scaf194	400001	0.00728031	0.307299
scaf27	1600001	0.00710139	0.309575
scaf27	1775001	0.00836738	0.309958
scaf20	7675001	0.00737897	0.310242
scaf28	5825001	0.00239046	0.310769
scaf152	500001	0.00706797	0.311752
scaf19	4400001	0.00710508	0.312403
scaf13	4475001	0.00225364	0.313948
scaf24	7725001	0.00253126	0.314634
scaf70	1325001	0.00807784	0.315497
scaf124	1275001	0.00708487	0.316334
scaf32	2725001	0.0100915	0.316731
scaf13	6175001	0.00856688	0.316832
scaf10	1475001	0.00705665	0.318648
scaf37	5075001	0.00250102	0.319243
scaf82	175001	0.00748632	0.321003
scaf20	15175001	0.00239664	0.321246
scaf109	125001	0.00744239	0.322925
scaf163	575001	0.00834027	0.327609
scaf86	375001	0.00706854	0.327845
scaf28	9775001	0.00688788	0.328625
scaf133	700001	0.00702545	0.330142
scaf23	13025001	0.00222205	0.332044
scaf196	175001	0.00251623	0.337062
scaf180	500001	0.00856928	0.337146
scaf120	1100001	0.00717007	0.33737
scaf34	7675001	0.00269588	0.338211
scaf139	125001	0.00268215	0.338239
scaf109	50001	0.00774362	0.339288
scaf168	175001	0.00232371	0.3397
scaf61	2875001	0.00975436	0.341325
scaf10	18825001	0.00229467	0.344263
scaf14	5050001	0.00702552	0.344283
scaf63	2225001	0.00699854	0.346834
scaf24	7850001	0.00265509	0.348376
scaf45	6950001	0.00253677	0.348987
scaf10	1675001	0.00727841	0.349432
scaf169	325001	0.00708408	0.349697
scaf10	13975001	0.00707318	0.351566
scaf93	275001	0.00705481	0.352217
scaf70	1425001	0.0024174	0.352903
scaf105	1225001	0.0070507	0.354373
scaf24	7700001	0.00265507	0.358694
scaf96	725001	0.00263225	0.361422
scaf90	1375001	0.00690653	0.365979
scaf74	3575001	0.00258219	0.36615
scaf99	1775001	0.00211294	0.370427
scaf73	2100001	0.00701463	0.371494
scaf152	525001	0.00723797	0.372416
scaf19	2275001	0.4375	0.373211
scaf10	16625001	0.00220857	0.374173
scaf15	3275001	0.00167449	0.376232
scaf209	350001	0.00698729	0.376501
scaf20	2850001	0.00700555	0.376801
scaf91	1700001	0.00700678	0.379545
scaf20	2150001	0.00694137	0.380696
scaf216	275001	0.00735518	0.381658
scaf24	8400001	0.00270379	0.381788
scaf132	300001	0.00710065	0.382013
scaf71	25001	0.00256065	0.382882
scaf183	325001	0.0104009	0.383357
scaf219	200001	0.00269761	0.38341
scaf188	325001	0.00122194	0.384814
scaf109	1525001	0.00695089	0.385008
scaf15	13100001	0.0072517	0.389176
scaf53	5525001	0.00688818	0.389542
scaf36	1075001	0.00784888	0.389776
scaf228	25001	0.00244594	0.389923
scaf57	25001	0.00188811	0.390354
scaf93	1975001	0.00720225	0.392002
scaf25	9575001	0.00786755	0.392061
scaf24	7650001	0.00238285	0.392333
scaf119	1000001	0.00699096	0.395753
scaf122	175001	0.00237133	0.396977
scaf74	4200001	0.00257952	0.397266
scaf10	4125001	0.00224701	0.400422
scaf86	1575001	0.00741793	0.400578
scaf35	4725001	0.00807068	0.40089
scaf34	7025001	0.00715711	0.40142
scaf25	8125001	0.00754727	0.401613
scaf54	1575001	0.0023243	0.403165
scaf24	7675001	0.00259379	0.403312
scaf29	75001	0.00890418	0.410292
scaf54	1725001	0.00261355	0.41077
scaf39	3475001	0.00150792	0.411678
scaf180	50001	0.00725981	0.411867
scaf74	4225001	0.00267194	0.41322
scaf42	25001	0.00747318	0.413243
scaf28	3625001	0.00937893	0.415912
scaf70	2075001	0.00696189	0.41595
scaf24	8500001	0.00233876	0.417409
scaf97	25001	0.00266978	0.419771
scaf17	2375001	0.00247853	0.420898
scaf91	1500001	0.00702825	0.421981
scaf11	10325001	0.00260355	0.422833
scaf77	2325001	0.00183377	0.424741
scaf65	3450001	0.00257896	0.425677
scaf51	3325001	0.00250341	0.425735
scaf16	10275001	0.00842198	0.430738
scaf132	925001	0.0018652	0.43394
scaf110	100001	0.00267305	0.435127
scaf179	375001	0.00690231	0.437236
scaf64	2375001	0.00093582	0.437376
scaf49	3125001	0.00689413	0.443588
scaf54	2025001	0.00243599	0.444524
scaf13	14675001	0.00266421	0.444757
scaf132	825001	0.00685893	0.445933
scaf125	125001	0.00269576	0.448045
scaf40	1575001	0.00228198	0.449402
scaf54	1500001	0.00237734	0.450484
scaf62	2825001	0.002565	0.452581
scaf81	2025001	0.0025353	0.452693
scaf12	75001	0.00270191	0.454801
scaf149	775001	0.00704646	0.455172
scaf248	25001	0.00708421	0.459192
scaf17	1150001	0.00260105	0.45923
scaf15	9000001	0.00252598	0.46029
scaf94	25001	0.00687076	0.46094
scaf287	50001	0.00224498	0.461215
scaf234	325001	0.00233789	0.463625
scaf28	825001	0.00794581	0.464658
scaf183	125001	0.00234708	0.464913
scaf148	175001	0.00721033	0.465084
scaf20	2925001	0.00742058	0.465244
scaf24	7900001	0.00259327	0.465641
scaf15	11475001	0.00238872	0.46739
scaf331	25001	0.00269384	0.468979
scaf24	7925001	0.00197243	0.470842
scaf17	1225001	0.00266368	0.47242
scaf219	75001	0.00251632	0.475029
scaf24	8525001	0.00245	0.479417
scaf64	25001	0.007795	0.481638
scaf219	150001	0.00246431	0.48172
scaf12	17325001	0.0074201	0.481791
scaf12	25001	0.00226359	0.481964
scaf17	2350001	0.00266093	0.48339
scaf92	525001	0.0108723	0.484126
scaf360	1	0.00214366	0.486071
scaf17	700001	0.00235055	0.487662
scaf11	22175001	0.133333	0.490675
scaf14	5125001	0.00798887	0.49131
scaf219	350001	0.00218422	0.493563
scaf112	275001	0.00142586	0.493608
scaf23	3550001	0.00188394	0.493913
scaf118	1125001	0.00168456	0.494923
scaf15	5175001	0.0102333	0.495258
scaf28	9825001	0.00710902	0.495329
scaf173	25001	0.00239095	0.496799
scaf17	750001	0.00259775	0.497294
scaf29	5775001	0.00195325	0.497519
scaf10	3475001	0.00790424	0.497837
scaf36	7750001	0.00203457	0.498562
scaf26	6475001	0.00268089	0.499044
scaf20	7375001	0.00706707	0.500295
scaf24	10325001	0.00171041	0.500614
scaf96	1725001	0.00844388	0.501553
scaf225	175001	0.00835369	0.50203
scaf112	1300001	0.00249062	0.502776
scaf15	1275001	0.00902235	0.503965
scaf13	4725001	0.00259275	0.506997
scaf13	13225001	0.00249382	0.507164
scaf45	6725001	0.00179293	0.50728
scaf164	175001	0.00814361	0.507677
scaf294	125001	0.00139677	0.507978
scaf29	5750001	0.00211951	0.508988
scaf18	11275001	0.00711533	0.509198
scaf24	10425001	0.00233511	0.509509
scaf77	2250001	0.00183599	0.510393
scaf130	750001	0.00258135	0.511032
scaf130	550001	0.00256277	0.512246
scaf24	6700001	0.00222919	0.513322
scaf15	8925001	0.00271377	0.514206
scaf24	6650001	0.00190317	0.514671
scaf12	1	0.00229846	0.514702
scaf24	7150001	0.00253306	0.515786
scaf12	10725001	0.00214392	0.516359
scaf15	9075001	0.00270851	0.51641
scaf54	1900001	0.00261317	0.517839
scaf15	9175001	0.0025977	0.519915
scaf44	1175001	0.00261259	0.520203
scaf21	2025001	0.00266172	0.521069
scaf54	825001	0.00684558	0.52192
scaf24	8225001	0.00247846	0.523127
scaf29	5650001	0.00256008	0.525332
scaf38	2875001	0.00718552	0.526258
scaf80	25001	0.00152456	0.528624
scaf10	8075001	0.00260489	0.529072
scaf269	75001	0.00271167	0.529318
scaf15	10725001	0.00705256	0.531006
scaf54	1475001	0.00214621	0.531408
scaf13	13200001	0.00211862	0.534408
scaf68	2000001	0.00201139	0.535589
scaf15	8425001	0.00179711	0.537622
scaf17	10875001	0.00264659	0.538351
scaf34	5825001	0.00271017	0.538486
scaf17	775001	0.00221867	0.542795
scaf219	125001	0.00260175	0.550969
scaf24	6675001	0.0025409	0.554132
scaf23	100001	0.0019053	0.555518
scaf108	1600001	0.00270253	0.555771
scaf11	12775001	0.00831897	0.558632
scaf45	5650001	0.00243631	0.561514
scaf15	8975001	0.00237836	0.562862
scaf227	50001	0.00240461	0.56478
scaf219	100001	0.00220585	0.565222
scaf23	3625001	0.00268625	0.566801
scaf174	125001	0.00258321	0.572087
scaf12	10650001	0.00214429	0.574963
scaf24	6475001	0.00263125	0.583196
scaf38	750001	0.00254715	0.584189
scaf287	75001	0.00269814	0.586808
scaf75	4100001	0.00234481	0.587114
scaf52	75001	0.00261896	0.588172
scaf241	25001	0.0024896	0.591146
scaf130	675001	0.00186147	0.59179
scaf29	5725001	0.00241308	0.594803
scaf313	25001	0.00103207	0.596059
scaf15	9200001	0.00259027	0.598145
scaf54	1450001	0.00208857	0.598156
scaf112	1450001	0.00221619	0.600741
scaf92	2450001	0.00222503	0.604781
scaf23	125001	0.00249678	0.611496
scaf130	600001	0.00195244	0.611658
scaf29	5700001	0.00213972	0.612267
scaf38	1100001	0.00216033	0.614771
scaf130	650001	0.0017309	0.618951
scaf45	5550001	0.00271598	0.619039
scaf24	10300001	0.00205057	0.623444
scaf40	1425001	0.00270636	0.629136
scaf92	2400001	0.00255927	0.629507
scaf240	125001	0.00238316	0.634862
scaf118	1250001	0.00256606	0.635994
scaf20	15050001	0.00312585	0.6364
scaf15	15000001	0.00418302	0.636422
scaf67	1550001	0.00307583	0.636948
scaf39	2025001	0.00567167	0.637054
scaf21	4550001	0.00406258	0.637175
scaf390	50001	0.00470775	0.637622
scaf48	1700001	0.00363595	0.637805
scaf14	9050001	0.00418156	0.638065
scaf84	1	0.00413523	0.638372
scaf14	3625001	0.00468352	0.638444
scaf20	14800001	0.00354608	0.638637
scaf79	1700001	0.00424482	0.638663
scaf18	325001	0.00499547	0.638967
scaf84	25001	0.00533542	0.639046
scaf24	6600001	0.00307616	0.639597
scaf18	4200001	0.00438262	0.639755
scaf246	50001	0.00563925	0.640495
scaf66	1950001	0.00407223	0.640744
scaf12	20275001	0.00515068	0.640777
scaf17	7850001	0.00405171	0.640779
scaf20	14825001	0.00417005	0.640846
scaf118	1275001	0.00450875	0.641079
scaf30	3475001	0.00443811	0.641119
scaf79	1675001	0.00521534	0.641638
scaf21	1150001	0.00287858	0.642876
scaf12	1975001	0.00316471	0.643181
scaf123	225001	0.00395235	0.64341
scaf92	2425001	0.00294208	0.643499
scaf62	2975001	0.00453803	0.643673
scaf81	2750001	0.00443076	0.643854
scaf81	2175001	0.00340049	0.644195
scaf24	10450001	0.00329428	0.644334
scaf315	100001	0.00328702	0.644394
scaf33	7500001	0.00377274	0.6445
scaf112	1475001	0.00316314	0.645163
scaf16	5750001	0.00519236	0.645412
scaf36	8150001	0.00371363	0.645727
scaf51	4225001	0.00316155	0.646408
scaf24	5750001	0.00328053	0.646673
scaf56	1200001	0.00421391	0.646817
scaf12	11500001	0.00286085	0.646832
scaf18	5600001	0.00473057	0.647294
scaf18	2625001	0.00539017	0.647504
scaf138	1050001	0.00332717	0.647528
scaf33	7900001	0.00326559	0.647802
scaf246	100001	0.00560482	0.647806
scaf44	525001	0.00372259	0.647909
scaf18	5450001	0.00469106	0.648079
scaf62	2950001	0.00390237	0.648102
scaf12	3050001	0.00353897	0.648154
scaf20	14750001	0.0044527	0.648352
scaf44	550001	0.00333594	0.648502
scaf66	1925001	0.00525291	0.64853
scaf20	14675001	0.00346894	0.648753
scaf92	2150001	0.00433077	0.649298
scaf18	8375001	0.00545223	0.649545
scaf92	2175001	0.00417075	0.649926
scaf66	2500001	0.00283815	0.650219
scaf42	5625001	0.00410117	0.650766
scaf148	800001	0.00471366	0.650779
scaf17	3075001	0.00490441	0.651054
scaf23	13675001	0.00450634	0.651389
scaf17	7800001	0.0047752	0.65199
scaf18	6275001	0.00485028	0.652093
scaf285	150001	0.00309849	0.652232
scaf62	3200001	0.00443155	0.652682
scaf138	1025001	0.00447585	0.653642
scaf23	3650001	0.00372628	0.653752
scaf26	6300001	0.00457664	0.654061
scaf138	1075001	0.00396391	0.654221
scaf122	675001	0.00529918	0.654422
scaf17	3625001	0.00604567	0.654755
scaf18	5625001	0.00499903	0.655196
scaf20	14650001	0.00389029	0.655215
scaf67	150001	0.00409363	0.655223
scaf120	425001	0.00378989	0.656413
scaf130	375001	0.0032694	0.656649
scaf21	7500001	0.00357066	0.656858
scaf10	21650001	0.00320062	0.659795
scaf10	21625001	0.00318524	0.659801
scaf43	2200001	0.00418466	0.660774
scaf30	1050001	0.00476953	0.660972
scaf62	500001	0.00312864	0.661337
scaf62	3400001	0.00369862	0.661603
scaf18	5400001	0.00382877	0.661637
scaf120	375001	0.00448569	0.662256
scaf43	2175001	0.00512918	0.663289
scaf211	400001	0.00369809	0.663906
scaf129	900001	0.00305061	0.663987
scaf111	350001	0.00416483	0.66444
scaf22	5925001	0.00561128	0.665372
scaf15	6425001	0.00337095	0.665992
scaf111	1600001	0.00357096	0.666203
scaf40	1400001	0.0033983	0.667745
scaf75	4000001	0.0037387	0.668588
scaf120	75001	0.00286825	0.669241
scaf129	875001	0.00604927	0.669566
scaf38	500001	0.00313709	0.669702
scaf12	11525001	0.00445997	0.670071
scaf12	3075001	0.00473886	0.670107
scaf62	3375001	0.00366183	0.67042
scaf16	4450001	0.0044566	0.670943
scaf33	7650001	0.00364365	0.671125
scaf16	6350001	0.00320432	0.671193
scaf17	7825001	0.00536441	0.671597
scaf246	75001	0.00619238	0.671772
scaf21	7475001	0.0038945	0.671927
scaf120	350001	0.00349139	0.672417
scaf15	9225001	0.00282571	0.673106
scaf60	450001	0.00414188	0.674112
scaf92	2350001	0.00345821	0.674804
scaf43	6000001	0.00464635	0.675039
scaf120	400001	0.00337427	0.675131
scaf173	675001	0.00498716	0.675252
scaf44	1775001	0.00437944	0.675289
scaf229	250001	0.00274455	0.677388
scaf75	4025001	0.00368944	0.677726
scaf599	1	0.00347786	0.678291
scaf301	75001	0.00423433	0.678425
scaf293	50001	0.00283032	0.678565
scaf26	6325001	0.00401761	0.679178
scaf65	2125001	0.00381256	0.680986
scaf21	4575001	0.0044537	0.681588
scaf382	1	0.0033769	0.681789
scaf21	1975001	0.00285837	0.683783
scaf42	5650001	0.00372494	0.684355
scaf285	125001	0.00303004	0.68507
scaf56	50001	0.00288198	0.686259
scaf43	6275001	0.00465663	0.687284
scaf21	1950001	0.00306345	0.691297
scaf16	4425001	0.00488991	0.692958
scaf13	14625001	0.00366853	0.692992
scaf38	450001	0.0034129	0.693481
scaf17	900001	0.00314404	0.694324
scaf18	5425001	0.00395866	0.695826
scaf38	250001	0.00359248	0.696738
scaf38	300001	0.00335813	0.702031
scaf26	6275001	0.00564722	0.703877
scaf81	2775001	0.00359704	0.704681
scaf18	5750001	0.00332575	0.706099
scaf189	375001	0.00404553	0.706103
scaf192	450001	0.00376727	0.706483
scaf92	2375001	0.00376932	0.707382
scaf38	275001	0.00443618	0.708018
scaf60	475001	0.00510624	0.710075
scaf293	75001	0.00308944	0.710112
scaf38	325001	0.00367218	0.712129
scaf51	4250001	0.00283653	0.713069
scaf43	6025001	0.0052174	0.715895
scaf110	1525001	0.00310952	0.720102
scaf51	4150001	0.00294833	0.725315
scaf18	5700001	0.00341084	0.731191
scaf20	14550001	0.00275892	0.733203
scaf130	425001	0.00301265	0.737889
scaf20	14600001	0.00389644	0.747747
scaf23	13700001	0.00359253	0.749723
scaf51	4275001	0.00301501	0.756977
scaf26	6350001	0.00287141	0.757745
scaf20	14525001	0.00372952	0.764024
scaf192	475001	0.00362519	0.776866
scaf11	4875001	0.00446295	0.779663
scaf62	800001	0.00326765	0.781572
scaf18	5725001	0.00358569	0.788395
scaf38	875001	0.00298225	0.79624
scaf62	775001	0.00453576	0.803845
scaf26	6375001	0.00415078	0.827042
scaf89	800001	0.00571207	0.108914
scaf19	8750001	0.00535643	0.109227
scaf50	50001	0.00616299	0.10927
scaf64	1400001	0.0061416	0.109484
scaf35	1475001	0.00464409	0.109529
scaf115	575001	0.0053564	0.109581
scaf63	3925001	0.00554171	0.109763
scaf13	1350001	0.00422808	0.10981
scaf46	600001	0.0045851	0.109935
scaf64	3100001	0.00592541	0.110044
scaf86	750001	0.00560063	0.11053
scaf35	1500001	0.00577484	0.110655
scaf209	225001	0.0053488	0.110715
scaf82	1100001	0.00597635	0.110877
scaf117	1275001	0.00504368	0.111177
scaf160	75001	0.00387877	0.111231
scaf95	375001	0.00577791	0.111489
scaf80	2150001	0.00464653	0.111942
scaf84	2525001	0.00578068	0.112634
scaf82	1225001	0.00521352	0.113434
scaf19	4675001	0.006626	0.113566
scaf57	3400001	0.00572839	0.113993
scaf157	375001	0.00483007	0.114008
scaf63	3275001	0.00568107	0.114258
scaf200	25001	0.00461518	0.114783
scaf11	4650001	0.00369452	0.114822
scaf13	2400001	0.00507908	0.114891
scaf144	725001	0.00607134	0.115
scaf82	975001	0.006375	0.115015
scaf45	250001	0.00563679	0.115089
scaf117	350001	0.00547247	0.115404
scaf117	400001	0.00606791	0.115587
scaf177	250001	0.0052637	0.115609
scaf128	175001	0.00517001	0.115664
scaf117	25001	0.00549541	0.115666
scaf128	400001	0.00577053	0.115817
scaf46	475001	0.00479719	0.115906
scaf200	50001	0.00516729	0.11592
scaf116	500001	0.00577086	0.116157
scaf82	850001	0.00638604	0.116464
scaf46	1225001	0.00507872	0.116838
scaf35	1400001	0.00475521	0.117027
scaf115	225001	0.00388614	0.117032
scaf19	7775001	0.00486607	0.117086
scaf69	50001	0.00547998	0.118196
scaf60	4250001	0.00473483	0.118624
scaf18	10800001	0.00668311	0.118782
scaf156	75001	0.00517667	0.119372
scaf11	3150001	0.00416162	0.11959
scaf41	275001	0.00305377	0.119746
scaf208	375001	0.00557477	0.119746
scaf71	1225001	0.0051583	0.119751
scaf46	2075001	0.00491577	0.119781
scaf16	13950001	0.00560492	0.120085
scaf35	1450001	0.00514059	0.120377
scaf63	3325001	0.00541124	0.120403
scaf124	325001	0.00617856	0.12157
scaf19	4100001	0.00523946	0.121602
scaf32	100001	0.00477373	0.121858
scaf19	4325001	0.00631757	0.122009
scaf59	200001	0.00612917	0.122313
scaf22	13900001	0.00568396	0.122724
scaf18	10625001	0.00344346	0.1228
scaf115	200001	0.00503353	0.123091
scaf25	8200001	0.00654	0.12334
scaf115	250001	0.00476998	0.123786
scaf158	300001	0.0060137	0.123828
scaf36	2375001	0.00625431	0.123949
scaf41	1700001	0.00615179	0.124121
scaf15	16550001	0.00516631	0.124545
scaf10	550001	0.00375114	0.124706
scaf70	1725001	0.0059417	0.12516
scaf165	350001	0.00615032	0.125202
scaf22	14050001	0.0055457	0.125203
scaf19	1	0.00527724	0.125518
scaf105	625001	0.00402469	0.125678
scaf63	4050001	0.00620879	0.126056
scaf102	450001	0.0053666	0.126245
scaf177	275001	0.00516242	0.126256
scaf165	225001	0.00574877	0.126316
scaf69	2550001	0.00614882	0.126597
scaf36	3475001	0.00553214	0.126655
scaf247	50001	0.00650838	0.12674
scaf46	1200001	0.00541449	0.126762
scaf117	1175001	0.00557645	0.127031
scaf32	850001	0.00516096	0.127625
scaf35	175001	0.00466947	0.127672
scaf68	475001	0.00494051	0.127691
scaf116	825001	0.00558485	0.127723
scaf124	200001	0.00658675	0.128166
scaf10	675001	0.00550998	0.128215
scaf86	250001	0.00536082	0.128327
scaf90	1825001	0.00510006	0.129168
scaf160	325001	0.00549497	0.129176
scaf25	11825001	0.00380274	0.129238
scaf209	250001	0.00592628	0.129348
scaf17	14400001	0.00613667	0.129414
scaf57	3450001	0.00555145	0.129476
scaf63	3225001	0.00431319	0.129518
scaf59	175001	0.00577589	0.129779
scaf11	3175001	0.00500885	0.129781
scaf26	275001	0.0045595	0.131244
scaf29	5500001	0.00592306	0.13131
scaf72	2700001	0.00523036	0.132048
scaf56	175001	0.0045492	0.132545
scaf36	4425001	0.00507701	0.13257
scaf27	525001	0.00472516	0.133019
scaf19	5025001	0.00634397	0.133041
scaf93	2050001	0.00572173	0.133044
scaf63	3200001	0.00454322	0.1331
scaf189	150001	0.00549752	0.133196
scaf10	700001	0.0063363	0.133215
scaf75	250001	0.00614457	0.13331
scaf152	75001	0.00566404	0.133436
scaf117	200001	0.00555146	0.133504
scaf156	50001	0.00522447	0.133567
scaf113	1	0.00666762	0.133842
scaf64	850001	0.00595198	0.134157
scaf19	3800001	0.00563538	0.134333
scaf35	1425001	0.0054616	0.134833
scaf27	2450001	0.00540976	0.135129
scaf56	350001	0.00519876	0.135165
scaf43	6925001	0.00554128	0.135327
scaf106	550001	0.00582349	0.135534
scaf184	550001	0.00445705	0.135578
scaf226	150001	0.00587488	0.135848
scaf83	2850001	0.00327857	0.135997
scaf102	1050001	0.00577964	0.136149
scaf63	1475001	0.00529257	0.13621
scaf10	1325001	0.00641663	0.136652
scaf181	375001	0.00456644	0.137051
scaf64	900001	0.00602903	0.137204
scaf18	15500001	0.00570376	0.137557
scaf11	19525001	0.00478108	0.137773
scaf19	5550001	0.00610453	0.137773
scaf136	1	0.0038294	0.137786
scaf115	275001	0.00533077	0.13784
scaf124	650001	0.00593756	0.137954
scaf115	300001	0.0057389	0.138032
scaf11	19550001	0.00458243	0.138719
scaf117	1350001	0.00580559	0.138764
scaf128	300001	0.00519348	0.138865
scaf106	1150001	0.00483076	0.138964
scaf80	500001	0.00448973	0.139199
scaf15	7475001	0.00484656	0.139324
scaf22	14225001	0.00499526	0.139691
scaf89	2075001	0.00557367	0.139709
scaf64	1225001	0.00652992	0.139776
scaf19	4900001	0.0065443	0.139808
scaf140	50001	0.00622878	0.139811
scaf83	2550001	0.00480475	0.140124
scaf10	6125001	0.00471015	0.140198
scaf26	7575001	0.00470781	0.140323
scaf19	3825001	0.00553832	0.140398
scaf116	850001	0.00535043	0.140448
scaf128	200001	0.00568294	0.140753
scaf19	5050001	0.00578415	0.140998
scaf32	925001	0.00524575	0.141074
scaf25	9775001	0.00552992	0.141116
scaf36	4250001	0.00502401	0.141136
scaf132	1125001	0.00497283	0.14122
scaf10	22725001	0.00325059	0.141484
scaf38	2675001	0.00673835	0.141629
scaf73	2150001	0.00683384	0.141844
scaf117	425001	0.00540848	0.141908
scaf95	475001	0.00492663	0.141938
scaf20	13200001	0.00479613	0.141947
scaf119	25001	0.00633655	0.14197
scaf71	1000001	0.00582074	0.141976
scaf32	725001	0.00569142	0.142063
scaf36	4275001	0.00509316	0.142094
scaf36	2700001	0.00584513	0.142297
scaf10	8125001	0.00499463	0.142388
scaf93	225001	0.00633389	0.14257
scaf132	350001	0.00639091	0.142601
scaf22	14200001	0.00537032	0.142674
scaf10	5050001	0.00488664	0.142716
scaf50	1250001	0.00534516	0.142739
scaf95	400001	0.00476551	0.142798
scaf19	3975001	0.00489795	0.142908
scaf221	275001	0.0046526	0.142985
scaf18	11225001	0.00657384	0.143215
scaf153	1	0.0059265	0.14322
scaf52	925001	0.00552436	0.143221
scaf57	3425001	0.00528603	0.143236
scaf71	2125001	0.00455466	0.143261
scaf36	3425001	0.00651469	0.14358
scaf41	1500001	0.00427855	0.143605
scaf83	3025001	0.00374835	0.143725
scaf20	125001	0.00645553	0.14391
scaf144	675001	0.00545503	0.143988
scaf116	1050001	0.00498166	0.144009
scaf82	2900001	0.00572568	0.144034
scaf10	6100001	0.00537905	0.144218
scaf69	2525001	0.00550141	0.144435
scaf51	425001	0.00572312	0.144846
scaf19	5200001	0.00616691	0.144931
scaf242	250001	0.00627401	0.144947
scaf36	4025001	0.00483412	0.144961
scaf132	175001	0.00572547	0.144973
scaf70	1825001	0.00542097	0.145617
scaf28	6300001	0.00410529	0.145841
scaf15	9375001	0.0027298	0.145879
scaf83	3050001	0.00297716	0.146049
scaf37	5600001	0.00497769	0.146267
scaf134	500001	0.0060503	0.146508
scaf13	2225001	0.00483042	0.146524
scaf14	18925001	0.00445588	0.146576
scaf106	850001	0.0052906	0.14663
scaf157	325001	0.00543017	0.146677
scaf95	1200001	0.00544143	0.146715
scaf117	225001	0.00511554	0.146748
scaf70	2425001	0.00576499	0.146777
scaf153	550001	0.00560542	0.146787
scaf102	300001	0.00527206	0.147134
scaf189	125001	0.00588829	0.147242
scaf25	10075001	0.00639358	0.147305
scaf12	20825001	0.00513251	0.147734
scaf158	425001	0.00456843	0.147979
scaf45	400001	0.0053795	0.148163
scaf128	1125001	0.00454555	0.148204
scaf83	2525001	0.00462489	0.148205
scaf37	1250001	0.00566618	0.148225
scaf209	1	0.00455677	0.148743
scaf15	7500001	0.0051874	0.148969
scaf116	625001	0.00656603	0.14903
scaf89	850001	0.00658721	0.14948
scaf160	300001	0.00582359	0.149992
scaf10	22700001	0.00491627	0.150015
scaf119	50001	0.0055071	0.15011
scaf128	1175001	0.00535304	0.15022
scaf51	1225001	0.0038589	0.15029
scaf14	18900001	0.00443874	0.150389
scaf69	1275001	0.00480227	0.150514
scaf48	4350001	0.00506623	0.150549
scaf152	650001	0.00597897	0.150562
scaf50	1100001	0.00596899	0.150581
scaf177	150001	0.00574767	0.150583
scaf144	450001	0.00417653	0.150933
scaf64	1200001	0.00453215	0.150934
scaf213	275001	0.0049838	0.15094
scaf32	900001	0.00547799	0.151004
scaf46	300001	0.00518165	0.151308
scaf26	50001	0.00521184	0.151387
scaf70	1700001	0.00683808	0.151717
scaf117	500001	0.00543381	0.151738
scaf45	425001	0.0053243	0.151834
scaf95	1050001	0.00578021	0.151984
scaf82	1275001	0.0046026	0.151988
scaf89	1450001	0.00494166	0.152007
scaf106	875001	0.00543683	0.152044
scaf37	900001	0.00601657	0.152384
scaf41	1675001	0.00517277	0.152469
scaf25	11025001	0.00395638	0.152553
scaf70	3375001	0.00472989	0.152678
scaf50	1400001	0.00529235	0.152714
scaf41	5825001	0.00576237	0.152749
scaf28	3450001	0.00656999	0.152962
scaf106	225001	0.00495419	0.153404
scaf13	1375001	0.00434467	0.153545
scaf95	1100001	0.00514087	0.153945
scaf41	5450001	0.00510512	0.154062
scaf69	3650001	0.00476439	0.154265
scaf35	650001	0.00543172	0.1543
scaf106	1325001	0.00457673	0.154377
scaf95	1125001	0.00489431	0.154419
scaf41	5425001	0.00514207	0.154999
scaf117	375001	0.00569943	0.155132
scaf102	1825001	0.00444994	0.155176
scaf213	300001	0.00572593	0.155398
scaf63	4075001	0.00540393	0.155798
scaf153	400001	0.00440194	0.155944
scaf89	2050001	0.00616932	0.155977
scaf59	3075001	0.00503451	0.1561
scaf134	325001	0.0033973	0.156116
scaf35	200001	0.0056441	0.156156
scaf171	175001	0.00364045	0.156649
scaf101	1625001	0.00378253	0.156704
scaf95	525001	0.0055028	0.157064
scaf32	875001	0.00481739	0.157318
scaf76	2800001	0.00428685	0.15784
scaf19	5525001	0.00488433	0.158013
scaf101	1250001	0.00627767	0.158094
scaf39	600001	0.00583851	0.158175
scaf10	6150001	0.00543198	0.158291
scaf13	2375001	0.0046898	0.158371
scaf13	15800001	0.00507383	0.158655
scaf19	4950001	0.00586143	0.15884
scaf26	75001	0.0040252	0.158876
scaf95	1000001	0.00575929	0.158901
scaf221	325001	0.00638036	0.158951
scaf70	3350001	0.00560901	0.159197
scaf19	1475001	0.00448489	0.159559
scaf35	225001	0.00577985	0.159738
scaf13	15875001	0.00427216	0.159979
scaf165	100001	0.00536739	0.160039
scaf36	4925001	0.00519116	0.160549
scaf72	3900001	0.00567611	0.160604
scaf156	100001	0.0051599	0.160943
scaf42	2525001	0.00580846	0.160954
scaf19	3850001	0.00508273	0.161049
scaf221	250001	0.00559621	0.161058
scaf36	3375001	0.00576896	0.161087
scaf93	850001	0.00595649	0.161108
scaf22	12025001	0.00519691	0.161329
scaf46	1025001	0.00488564	0.16149
scaf36	2075001	0.00521814	0.161503
scaf36	3250001	0.00548503	0.161687
scaf39	2825001	0.00489453	0.161864
scaf35	1350001	0.00579462	0.161979
scaf15	14175001	0.00620311	0.162112
scaf57	3275001	0.00604965	0.162159
scaf13	2175001	0.00441766	0.162319
scaf64	3125001	0.00520752	0.162325
scaf22	14025001	0.0049838	0.162389
scaf128	1100001	0.00513886	0.162796
scaf36	5675001	0.00523538	0.162851
scaf128	1150001	0.00511966	0.16327
scaf36	3575001	0.00533322	0.163334
scaf69	2650001	0.00547369	0.163424
scaf13	8775001	0.00315947	0.163517
scaf44	3525001	0.00554962	0.163569
scaf64	875001	0.00523015	0.163597
scaf63	3175001	0.00499249	0.163782
scaf64	2425001	0.00470107	0.163841
scaf45	3100001	0.00525317	0.163963
scaf17	14375001	0.00371731	0.164209
scaf13	1725001	0.00421336	0.164562
scaf117	1300001	0.00539557	0.164856
scaf90	1775001	0.00467909	0.165133
scaf25	12375001	0.00563176	0.16533
scaf36	4900001	0.00518249	0.165402
scaf128	425001	0.00370148	0.165488
scaf117	950001	0.00521086	0.1656
scaf95	450001	0.00556345	0.165709
scaf163	650001	0.00612042	0.165804
scaf28	4875001	0.00524738	0.165918
scaf209	300001	0.00643228	0.165928
scaf133	725001	0.00582243	0.165999
scaf57	3250001	0.00620985	0.166154
scaf36	3600001	0.00516242	0.166181
scaf11	22700001	0.00433699	0.166316
scaf37	25001	0.00574343	0.166335
scaf37	1200001	0.00550714	0.166444
scaf50	1200001	0.00609025	0.166532
scaf129	150001	0.00613664	0.166586
scaf64	4750001	0.00495611	0.16668
scaf86	225001	0.00491765	0.16678
scaf15	7450001	0.0052585	0.166916
scaf70	725001	0.00566279	0.166994
scaf91	925001	0.00584599	0.166997
scaf69	1675001	0.00466543	0.167044
scaf45	2300001	0.00538239	0.167219
scaf168	375001	0.00430985	0.167262
scaf116	700001	0.00515263	0.167527
scaf50	400001	0.00578971	0.16779
scaf70	2600001	0.00537859	0.16783
scaf63	1650001	0.00522235	0.167909
scaf37	675001	0.00653219	0.16795
scaf128	1075001	0.00549579	0.16817
scaf89	525001	0.00457504	0.168185
scaf63	4100001	0.00566608	0.168209
scaf36	4300001	0.00586087	0.168243
scaf14	5075001	0.00657072	0.168968
scaf72	3925001	0.00589788	0.169235
scaf59	4200001	0.00536231	0.16924
scaf19	3625001	0.00523911	0.169444
scaf372	1	0.0041499	0.169598
scaf89	1325001	0.00535276	0.169609
scaf42	2825001	0.00503668	0.169766
scaf71	2100001	0.00480635	0.170029
scaf35	1275001	0.0042281	0.170076
scaf67	1450001	0.00622919	0.170115
scaf71	1550001	0.0048226	0.170366
scaf22	12375001	0.00570473	0.170443
scaf165	500001	0.00484025	0.170483
scaf13	2200001	0.00501815	0.1705
scaf70	3325001	0.00386357	0.170699
scaf19	3775001	0.00498839	0.170727
scaf275	1	0.00606176	0.170967
scaf13	2100001	0.00531293	0.171068
scaf64	2675001	0.00598823	0.171171
scaf32	700001	0.00539614	0.171272
scaf171	400001	0.00565274	0.17129
scaf93	250001	0.00670895	0.171462
scaf63	3950001	0.00532054	0.171519
scaf28	1075001	0.00464303	0.171546
scaf156	25001	0.00467113	0.171617
scaf37	1	0.00576161	0.171845
scaf70	1750001	0.00590046	0.171892
scaf129	75001	0.00510617	0.171993
scaf14	12175001	0.00412507	0.172016
scaf10	500001	0.00334086	0.172053
scaf95	1175001	0.00545542	0.172203
scaf22	12650001	0.00532888	0.172214
scaf25	11000001	0.0063956	0.172264
scaf64	625001	0.00615333	0.172345
scaf75	375001	0.00528542	0.172351
scaf102	475001	0.00528859	0.172544
scaf126	250001	0.00367094	0.172619
scaf19	5150001	0.00571934	0.172706
scaf32	2825001	0.00499775	0.172716
scaf43	5075001	0.00572659	0.172848
scaf153	425001	0.00537611	0.17294
scaf153	450001	0.00508242	0.172976
scaf70	2500001	0.00436074	0.173245
scaf10	650001	0.00569257	0.17354
scaf63	3150001	0.00492452	0.173643
scaf71	1250001	0.00529954	0.173654
scaf19	9950001	0.00549862	0.173655
scaf117	625001	0.00575092	0.173726
scaf63	1900001	0.00619545	0.173855
scaf26	7675001	0.00463977	0.173931
scaf44	3350001	0.00546757	0.174011
scaf64	925001	0.00538889	0.174243
scaf76	2775001	0.00458092	0.174329
scaf60	4975001	0.0048356	0.174456
scaf96	450001	0.00542542	0.174608
scaf129	350001	0.00517235	0.174633
scaf117	475001	0.00612958	0.174799
scaf63	3125001	0.00562653	0.174884
scaf71	2175001	0.00455132	0.175122
scaf83	300001	0.00540394	0.175226
scaf172	625001	0.00530603	0.175357
scaf333	50001	0.00455444	0.175378
scaf125	600001	0.00478111	0.175452
scaf13	2500001	0.00621031	0.175611
scaf86	1250001	0.00474303	0.175959
scaf70	2350001	0.00561154	0.176041
scaf22	12625001	0.00581808	0.176522
scaf78	1525001	0.00507025	0.176947
scaf63	1600001	0.00535644	0.176957
scaf30	8300001	0.00608562	0.177141
scaf132	1150001	0.00612533	0.177172
scaf36	2100001	0.00623885	0.177244
scaf69	1250001	0.00573275	0.177335
scaf57	4425001	0.00610455	0.177562
scaf39	3400001	0.00324926	0.177807
scaf59	1050001	0.00505452	0.177833
scaf59	1	0.00442404	0.177846
scaf136	200001	0.00523229	0.177915
scaf125	575001	0.00623237	0.177927
scaf26	9525001	0.00456124	0.177975
scaf116	650001	0.00598585	0.177995
scaf19	4125001	0.00582382	0.178038
scaf32	675001	0.00475641	0.178368
scaf13	2800001	0.00623804	0.178473
scaf50	1	0.00540631	0.178527
scaf63	2675001	0.00402137	0.178536
scaf70	1850001	0.00503935	0.178563
scaf156	225001	0.00649361	0.178624
scaf19	5000001	0.00677915	0.178628
scaf26	650001	0.00630856	0.178803
scaf159	125001	0.00445311	0.178839
scaf45	375001	0.00554354	0.178934
scaf69	1700001	0.00604779	0.179158
scaf45	2225001	0.00469825	0.179305
scaf106	1175001	0.00480653	0.179457
scaf117	125001	0.00486346	0.179579
scaf67	1475001	0.00617752	0.179604
scaf172	600001	0.00476448	0.179767
scaf32	825001	0.00477907	0.179772
scaf75	350001	0.00452266	0.179839
scaf158	500001	0.00588785	0.179846
scaf69	1	0.00511856	0.18003
scaf34	1000001	0.0058166	0.180056
scaf209	75001	0.00526623	0.180212
scaf69	2675001	0.00553468	0.180269
scaf46	3225001	0.00492455	0.180472
scaf102	900001	0.00565901	0.18053
scaf51	1275001	0.00485614	0.180534
scaf89	1350001	0.00529712	0.180745
scaf125	550001	0.00583134	0.180821
scaf89	500001	0.00501717	0.180993
scaf26	7550001	0.00447676	0.18147
scaf22	2425001	0.00490295	0.18152
scaf125	1025001	0.00544209	0.18163
scaf144	600001	0.00517456	0.181694
scaf16	13975001	0.00608677	0.181776
scaf64	3300001	0.00454304	0.181781
scaf25	11300001	0.00676023	0.1818
scaf25	9000001	0.00614173	0.181881
scaf19	4925001	0.00631495	0.181921
scaf83	2450001	0.00559482	0.181984
scaf63	275001	0.00572425	0.181988
scaf64	2450001	0.00636629	0.182146
scaf27	7775001	0.0043211	0.182546
scaf36	3400001	0.00563022	0.182701
scaf102	950001	0.00480271	0.182722
scaf64	2650001	0.00659754	0.182926
scaf46	4250001	0.00485837	0.182956
scaf10	300001	0.00641573	0.183255
scaf89	275001	0.00507847	0.183279
scaf18	16350001	0.00487449	0.1833
scaf19	6475001	0.00425753	0.183322
scaf46	4575001	0.00569832	0.183355
scaf89	1475001	0.00620297	0.183375
scaf69	2575001	0.0055884	0.183382
scaf29	9300001	0.00578144	0.18343
scaf165	150001	0.00593418	0.183527
scaf57	3725001	0.0054787	0.183624
scaf90	225001	0.00640371	0.183741
scaf139	250001	0.00483772	0.183744
scaf165	575001	0.00492992	0.183773
scaf46	125001	0.00452018	0.183864
scaf64	3075001	0.00558608	0.184001
scaf82	1300001	0.00578958	0.184029
scaf22	12400001	0.00631089	0.184031
scaf59	4225001	0.00539304	0.184044
scaf70	2225001	0.00489891	0.184053
scaf128	275001	0.00603848	0.184065
scaf13	1975001	0.00416242	0.18417
scaf42	7275001	0.0051065	0.184192
scaf159	150001	0.00470751	0.184285
scaf72	3050001	0.0055031	0.184422
scaf83	2875001	0.00398681	0.184584
scaf63	1675001	0.00538871	0.184657
scaf46	450001	0.00547797	0.1848
scaf38	2575001	0.00581776	0.184827
scaf46	1800001	0.00534494	0.18487
scaf114	75001	0.00412546	0.185042
scaf78	1300001	0.0057831	0.185179
scaf152	800001	0.00541769	0.18533
scaf59	4175001	0.00423666	0.185362
scaf30	7950001	0.00544447	0.185856
scaf127	1175001	0.00412137	0.185963
scaf10	19375001	0.00355237	0.185979
scaf102	625001	0.00590045	0.186125
scaf32	3025001	0.00473594	0.186147
scaf43	6950001	0.00615245	0.186344
scaf25	10100001	0.00604337	0.186381
scaf35	975001	0.00556772	0.186574
scaf46	525001	0.00568043	0.18677
scaf36	2400001	0.00669234	0.187017
scaf27	375001	0.00322648	0.187246
scaf25	10350001	0.00644104	0.187389
scaf72	2725001	0.00541498	0.187398
scaf119	375001	0.00439434	0.187729
scaf117	1	0.00557763	0.187775
scaf226	75001	0.00517146	0.187783
scaf28	6425001	0.00567066	0.187849
scaf96	575001	0.0058845	0.187876
scaf18	15575001	0.00526276	0.187926
scaf30	7625001	0.00556914	0.18814
scaf15	7200001	0.00497549	0.188284
scaf386	50001	0.0057438	0.18834
scaf386	25001	0.00644429	0.18834
scaf69	3675001	0.00477092	0.188351
scaf106	1350001	0.00501857	0.188367
scaf19	5575001	0.00492522	0.188479
scaf107	25001	0.00319933	0.18848
scaf13	5225001	0.00459435	0.188817
scaf57	3925001	0.00559767	0.18888
scaf36	5025001	0.0056527	0.1889
scaf17	5200001	0.00540056	0.188908
scaf26	625001	0.00529141	0.189105
scaf119	350001	0.0045573	0.189173
scaf82	1325001	0.00575329	0.189186
scaf46	3200001	0.00526635	0.189187
scaf59	3050001	0.00500855	0.189223
scaf153	700001	0.00428753	0.189415
scaf22	12600001	0.00568097	0.189504
scaf26	250001	0.00506577	0.189604
scaf34	5675001	0.00656591	0.189623
scaf152	225001	0.00468984	0.189716
scaf95	975001	0.00472044	0.189723
scaf160	350001	0.00558589	0.189763
scaf165	125001	0.00532628	0.189787
scaf12	20800001	0.00531127	0.189806
scaf36	3300001	0.00514026	0.189889
scaf18	15825001	0.00528459	0.189946
scaf95	1700001	0.00499037	0.190034
scaf19	8775001	0.0046533	0.190082
scaf30	8275001	0.00546824	0.19016
scaf57	3825001	0.00553821	0.190235
scaf37	600001	0.00631827	0.190257
scaf86	1275001	0.00498078	0.190432
scaf152	825001	0.00475669	0.190508
scaf324	100001	0.00516341	0.190612
scaf25	10325001	0.00638965	0.190767
scaf19	4225001	0.00550901	0.190845
scaf75	2300001	0.00674327	0.190911
scaf25	8975001	0.00572344	0.190913
scaf46	500001	0.00531316	0.191139
scaf209	275001	0.00523194	0.191213
scaf18	10875001	0.0059973	0.191272
scaf15	4175001	0.00569635	0.191345
scaf86	775001	0.00551267	0.191435
scaf56	375001	0.00540988	0.191452
scaf129	175001	0.0037054	0.19147
scaf45	950001	0.00499335	0.191537
scaf59	2950001	0.00498199	0.191746
scaf12	21175001	0.00570119	0.191944
scaf35	1375001	0.00652712	0.192009
scaf41	1600001	0.00536042	0.192257
scaf189	100001	0.00658222	0.192262
scaf63	225001	0.00518658	0.192405
scaf92	200001	0.00584339	0.192484
scaf64	975001	0.00628267	0.192494
scaf105	1325001	0.0053478	0.192615
scaf46	1500001	0.00538183	0.192616
scaf95	200001	0.00576264	0.1927
scaf63	3900001	0.00521756	0.192702
scaf117	450001	0.00600971	0.192703
scaf124	1025001	0.00668492	0.192761
scaf230	250001	0.00488565	0.192849
scaf36	3650001	0.00437849	0.192887
scaf10	200001	0.00604834	0.192936
scaf89	1700001	0.00456997	0.192994
scaf69	25001	0.00567293	0.193016
scaf71	1600001	0.0060437	0.193083
scaf82	3300001	0.00543575	0.193139
scaf82	825001	0.0063604	0.193157
scaf116	675001	0.00636781	0.193183
scaf177	525001	0.0050339	0.193219
scaf38	2500001	0.00584326	0.193237
scaf57	3750001	0.00553373	0.193259
scaf19	5500001	0.00484455	0.193303
scaf63	2650001	0.00458581	0.193324
scaf164	625001	0.00513919	0.193339
scaf36	5000001	0.00534268	0.193427
scaf160	200001	0.00504024	0.193549
scaf51	300001	0.00474701	0.193675
scaf76	850001	0.00474359	0.193706
scaf63	3700001	0.00491089	0.193724
scaf185	500001	0.005709	0.193908
scaf41	6775001	0.00512855	0.193911
scaf209	50001	0.00532121	0.194033
scaf95	1875001	0.00477531	0.194083
scaf86	175001	0.00489243	0.194334
scaf64	1825001	0.00548938	0.194449
scaf49	350001	0.00523709	0.194525
scaf31	4800001	0.00320153	0.194539
scaf172	650001	0.0050417	0.194636
scaf70	2325001	0.00496273	0.195159
scaf26	7775001	0.00431949	0.195399
scaf46	1475001	0.00533124	0.195426
scaf36	2150001	0.00667494	0.19547
scaf42	7300001	0.00439221	0.195478
scaf114	50001	0.00580819	0.19553
scaf95	1725001	0.00530948	0.195605
scaf63	1625001	0.00554971	0.195716
scaf69	2050001	0.00607102	0.195795
scaf36	2625001	0.00590659	0.195855
scaf59	300001	0.00585035	0.195978
scaf72	4250001	0.00434203	0.196154
scaf22	13575001	0.00508908	0.196349
scaf20	3225001	0.00594696	0.196691
scaf46	1250001	0.00545626	0.196697
scaf117	650001	0.00568593	0.196701
scaf71	2025001	0.0042675	0.196719
scaf63	700001	0.00612686	0.196765
scaf59	1600001	0.00561812	0.196777
scaf161	300001	0.00480098	0.196821
scaf69	2475001	0.00577634	0.197083
scaf247	150001	0.00574864	0.197152
scaf29	1000001	0.0047187	0.197175
scaf19	4650001	0.00658925	0.197183
scaf164	675001	0.00514056	0.19719
scaf13	2425001	0.0051119	0.197404
scaf160	375001	0.00532897	0.197439
scaf52	1025001	0.00473256	0.197477
scaf37	1175001	0.00621188	0.197538
scaf73	1700001	0.00508749	0.197554
scaf36	4975001	0.00531834	0.19757
scaf90	200001	0.00616728	0.197595
scaf93	1775001	0.00522158	0.197755
scaf52	250001	0.00491491	0.19788
scaf70	925001	0.00432153	0.197923
scaf36	4100001	0.00453712	0.198141
scaf44	3550001	0.00625766	0.198258
scaf95	1675001	0.00535957	0.198364
scaf102	925001	0.00603035	0.198498
scaf115	175001	0.00526772	0.19855
scaf16	13925001	0.00578383	0.198562
scaf95	500001	0.00550411	0.198571
scaf70	1675001	0.00619327	0.198769
scaf64	950001	0.00617064	0.198808
scaf89	2525001	0.00479287	0.198835
scaf63	3100001	0.00516545	0.198898
scaf76	400001	0.00415822	0.199039
scaf116	1150001	0.00390512	0.199136
scaf83	2475001	0.00559478	0.199208
scaf152	625001	0.00640377	0.199271
scaf69	2925001	0.00499825	0.199286
scaf134	675001	0.00585719	0.199382
scaf177	125001	0.00501693	0.199431
scaf46	100001	0.00503046	0.199434
scaf105	1300001	0.00590636	0.199466
scaf19	4250001	0.0061161	0.199652
scaf82	800001	0.00590557	0.199672
scaf139	225001	0.00452348	0.199796
scaf35	1125001	0.00522666	0.199831
scaf117	1375001	0.00495647	0.199886
scaf36	1875001	0.00524839	0.20002
scaf226	250001	0.00543642	0.200028
scaf28	6450001	0.00501109	0.200047
scaf40	225001	0.00498372	0.200164
scaf35	825001	0.00488761	0.20021
scaf36	2800001	0.00556668	0.200236
scaf19	4000001	0.00552003	0.20026
scaf19	3750001	0.00520139	0.200484
scaf35	875001	0.00558479	0.20064
scaf86	150001	0.00476392	0.200798
scaf63	3850001	0.00580929	0.200805
scaf168	350001	0.00488851	0.200887
scaf25	7000001	0.00429697	0.200949
scaf19	3950001	0.00520256	0.200972
scaf40	3125001	0.0050909	0.201148
scaf117	1250001	0.00500941	0.201215
scaf35	150001	0.00512722	0.2013
scaf122	325001	0.00503627	0.201393
scaf22	14175001	0.00492139	0.201521
scaf177	425001	0.00488833	0.201572
scaf59	3025001	0.00565322	0.20161
scaf82	3375001	0.00544411	0.201683
scaf67	1325001	0.00620192	0.201725
scaf13	6850001	0.00510028	0.201777
scaf42	2975001	0.00459183	0.20202
scaf36	5050001	0.00485476	0.202206
scaf50	1225001	0.00638591	0.202275
scaf71	2050001	0.0041974	0.202354
scaf57	3775001	0.00544591	0.202385
scaf19	4725001	0.00614309	0.202407
scaf36	3225001	0.00516263	0.20245
scaf19	25001	0.00496881	0.20248
scaf18	16450001	0.00539268	0.202593
scaf19	4200001	0.00572105	0.202742
scaf92	175001	0.00605529	0.202809
scaf26	725001	0.00626966	0.202857
scaf134	525001	0.00622785	0.202891
scaf204	25001	0.00516109	0.203026
scaf20	7650001	0.00648119	0.203104
scaf29	5525001	0.00598935	0.203134
scaf161	75001	0.00445336	0.203183
scaf132	200001	0.00641044	0.20326
scaf136	225001	0.00506092	0.203323
scaf57	3850001	0.00516486	0.203344
scaf41	1475001	0.00498731	0.20335
scaf10	3650001	0.00580948	0.203356
scaf28	10375001	0.00560938	0.203377
scaf19	5700001	0.00592701	0.203537
scaf45	300001	0.00516384	0.203543
scaf86	800001	0.00628143	0.203578
scaf19	4975001	0.00574283	0.20376
scaf117	1200001	0.00489881	0.203768
scaf116	600001	0.00675038	0.203804
scaf30	8150001	0.00509485	0.203806
scaf94	550001	0.00406216	0.203856
scaf86	275001	0.00513502	0.203866
scaf89	2300001	0.00516456	0.203916
scaf59	225001	0.00596317	0.203938
scaf70	2625001	0.00443667	0.204013
scaf36	4400001	0.00450579	0.204082
scaf63	3475001	0.004987	0.204138
scaf226	175001	0.00546087	0.204169
scaf69	3925001	0.00516381	0.204236
scaf64	825001	0.00431616	0.20424
scaf64	2525001	0.00558986	0.204254
scaf54	350001	0.00415299	0.204363
scaf52	950001	0.00459268	0.204387
scaf339	1	0.00513814	0.204401
scaf59	2825001	0.00533165	0.204633
scaf69	2900001	0.00586892	0.204647
scaf69	4200001	0.00451979	0.204692
scaf71	2075001	0.00406195	0.20475
scaf56	200001	0.00440148	0.204811
scaf71	1300001	0.00553656	0.204988
scaf40	50001	0.00458393	0.205059
scaf70	475001	0.00489996	0.20511
scaf70	2475001	0.00520144	0.20515
scaf48	4975001	0.00436509	0.205369
scaf41	5800001	0.00587556	0.205422
scaf46	2100001	0.00586912	0.205434
scaf19	8025001	0.00543858	0.205487
scaf36	2600001	0.00593314	0.205493
scaf70	3300001	0.00435672	0.20558
scaf106	200001	0.00496281	0.205709
scaf45	2325001	0.00458513	0.205772
scaf29	9275001	0.00550076	0.205827
scaf156	125001	0.00517603	0.205862
scaf226	1	0.00546627	0.205943
scaf95	275001	0.00614404	0.205947
scaf20	13125001	0.00417161	0.205958
scaf37	1325001	0.005711	0.205992
scaf78	1475001	0.00500175	0.206415
scaf152	575001	0.00652254	0.206532
scaf32	75001	0.00514574	0.206593
scaf14	16250001	0.00517158	0.20662
scaf25	8325001	0.00660403	0.206817
scaf35	1100001	0.00484869	0.20698
scaf25	12350001	0.00668241	0.20709
scaf51	1575001	0.00518759	0.207179
scaf35	925001	0.00543281	0.207219
scaf18	10725001	0.00543064	0.2073
scaf160	425001	0.00545017	0.207397
scaf64	4900001	0.00435816	0.207416
scaf57	4175001	0.00520782	0.207555
scaf20	13150001	0.00422172	0.207676
scaf11	19500001	0.00540261	0.207778
scaf70	550001	0.00557044	0.207925
scaf37	5625001	0.00496772	0.208016
scaf64	725001	0.00585825	0.208035
scaf113	25001	0.00641498	0.208061
scaf46	150001	0.00505029	0.208347
scaf80	350001	0.00652914	0.208385
scaf71	1750001	0.0049712	0.208604
scaf22	12050001	0.00572859	0.208612
scaf63	3250001	0.00544815	0.208622
scaf102	700001	0.00560787	0.208625
scaf57	4775001	0.00537842	0.20872
scaf124	350001	0.0063298	0.208836
scaf25	7025001	0.00462976	0.208859
scaf26	9500001	0.00472385	0.208945
scaf76	1150001	0.0047311	0.208974
scaf95	550001	0.00607618	0.209361
scaf153	125001	0.00457847	0.209362
scaf50	25001	0.00520701	0.209442
scaf35	500001	0.00532946	0.209463
scaf30	7850001	0.00579439	0.209501
scaf36	4200001	0.00451566	0.209522
scaf102	1125001	0.00580216	0.209527
scaf25	7700001	0.00538121	0.209556
scaf45	350001	0.00554421	0.209571
scaf24	3225001	0.0054074	0.209606
scaf69	2500001	0.00559397	0.209908
scaf27	5775001	0.00612078	0.209912
scaf25	12150001	0.00655592	0.209949
scaf95	425001	0.00580084	0.209969
scaf15	14725001	0.00431411	0.2101
scaf69	1725001	0.00607388	0.210122
scaf37	200001	0.0058751	0.210153
scaf116	525001	0.00512764	0.210297
scaf78	1500001	0.00532928	0.210654
scaf42	2700001	0.00570824	0.210668
scaf116	50001	0.00432641	0.210734
scaf56	250001	0.00417354	0.210767
scaf80	2175001	0.00295166	0.210768
scaf46	1775001	0.00407375	0.210777
scaf41	5850001	0.00567547	0.210927
scaf26	7600001	0.00510567	0.210993
scaf89	1050001	0.00526905	0.211009
scaf117	575001	0.00559597	0.211075
scaf89	1375001	0.00533028	0.21118
scaf25	10300001	0.00613242	0.211303
scaf71	1575001	0.00529678	0.211312
scaf82	2850001	0.00577167	0.211481
scaf44	3500001	0.00547061	0.211484
scaf32	2800001	0.00545108	0.211496
scaf89	1750001	0.00519076	0.211508
scaf19	6650001	0.00562722	0.211528
scaf13	6600001	0.00404904	0.211725
scaf23	10125001	0.00585703	0.211735
scaf19	4050001	0.00599893	0.211762
scaf86	200001	0.00490195	0.21182
scaf19	3650001	0.00469952	0.211955
scaf117	825001	0.00408723	0.211988
scaf69	4225001	0.00396052	0.212012
scaf19	4350001	0.00677368	0.212081
scaf61	25001	0.00532876	0.212155
scaf164	700001	0.00537587	0.212246
scaf45	3125001	0.00613543	0.212248
scaf13	4250001	0.00537158	0.21226
scaf85	1475001	0.00552046	0.212287
scaf117	250001	0.00507457	0.212671
scaf27	825001	0.00559005	0.212715
scaf124	475001	0.0064764	0.21276
scaf57	3800001	0.0055937	0.212868
scaf116	1200001	0.00471097	0.212909
scaf56	625001	0.00456421	0.213022
scaf46	1400001	0.00577667	0.213225
scaf57	4325001	0.00571169	0.213277
scaf83	2500001	0.00386455	0.213281
scaf19	5475001	0.00615849	0.213287
scaf34	1025001	0.0054581	0.213296
scaf35	900001	0.00558862	0.213387
scaf30	8450001	0.00552346	0.213419
scaf41	5775001	0.00546319	0.213442
scaf160	525001	0.0046299	0.213495
scaf89	2200001	0.00520707	0.213499
scaf124	50001	0.00491506	0.213553
scaf37	5325001	0.00543816	0.213581
scaf19	5300001	0.00436035	0.213613
scaf27	700001	0.00592312	0.213963
scaf30	8075001	0.00550135	0.213991
scaf22	5100001	0.00477268	0.214016
scaf26	700001	0.00593094	0.214167
scaf41	1525001	0.00516362	0.214303
scaf91	1300001	0.00597924	0.214604
scaf37	5575001	0.00487867	0.214673
scaf19	4700001	0.00639754	0.214717
scaf13	6100001	0.00546759	0.214819
scaf268	125001	0.00607948	0.214828
scaf89	300001	0.00539236	0.215062
scaf168	425001	0.00501193	0.215073
scaf36	2725001	0.00631317	0.215081
scaf26	7425001	0.00352473	0.215106
scaf40	3100001	0.00532512	0.215185
scaf36	4175001	0.00471362	0.215371
scaf36	4950001	0.00533267	0.215401
scaf27	1625001	0.00629592	0.215402
scaf122	1200001	0.00576659	0.215484
scaf177	50001	0.0052937	0.215499
scaf19	3875001	0.00580815	0.215696
scaf132	325001	0.00621309	0.215726
scaf59	100001	0.00565068	0.215728
scaf13	15850001	0.0050777	0.215772
scaf26	7750001	0.0042065	0.215939
scaf15	7300001	0.00507561	0.21606
scaf181	400001	0.00561485	0.216202
scaf35	1075001	0.00571549	0.216429
scaf165	725001	0.00462143	0.216451
scaf70	2150001	0.00488413	0.216508
scaf16	13900001	0.00632317	0.21651
scaf27	500001	0.00474691	0.216546
scaf102	600001	0.00515593	0.216628
scaf116	425001	0.00522345	0.216634
scaf70	2250001	0.00481964	0.216757
scaf14	16225001	0.00532355	0.2168
scaf133	175001	0.00514557	0.216902
scaf50	775001	0.00640884	0.216934
scaf40	25001	0.00470884	0.216985
scaf75	3575001	0.00501264	0.216988
scaf124	725001	0.00596969	0.217006
scaf71	2150001	0.00435192	0.217047
scaf18	15850001	0.00504697	0.217077
scaf82	1525001	0.00518397	0.217086
scaf128	975001	0.00426856	0.217188
scaf61	2700001	0.00660271	0.217192
scaf213	250001	0.00574546	0.21722
scaf69	1775001	0.00587671	0.217258
scaf83	2575001	0.00404842	0.217277
scaf70	3400001	0.00450055	0.2174
scaf204	125001	0.00593954	0.217541
scaf75	3550001	0.00486729	0.217569
scaf94	575001	0.00524667	0.217586
scaf37	4000001	0.00487485	0.217591
scaf34	7725001	0.00525973	0.217611
scaf34	1800001	0.00493763	0.217746
scaf26	1000001	0.005493	0.217748
scaf95	300001	0.00549171	0.217872
scaf57	3350001	0.00625166	0.217932
scaf34	7650001	0.00474238	0.217943
scaf36	2650001	0.00626907	0.218058
scaf39	875001	0.00500882	0.218108
scaf22	2375001	0.00486171	0.218207
scaf32	1375001	0.00557144	0.218229
scaf72	3175001	0.00556406	0.218383
scaf64	3150001	0.00543594	0.218419
scaf59	325001	0.00529297	0.218546
scaf19	6750001	0.00531331	0.218715
scaf59	4300001	0.00570833	0.218728
scaf128	25001	0.00511017	0.218746
scaf119	150001	0.00604453	0.218817
scaf48	4575001	0.00455483	0.21883
scaf26	1250001	0.00522719	0.219076
scaf19	4300001	0.00615539	0.219186
scaf14	16375001	0.00432177	0.219275
scaf63	725001	0.00592756	0.21928
scaf117	600001	0.00569916	0.219289
scaf140	25001	0.00342392	0.219416
scaf24	11725001	0.00512237	0.21955
scaf248	75001	0.0047001	0.21971
scaf52	1050001	0.00593386	0.219744
scaf37	6425001	0.00509383	0.219762
scaf48	3775001	0.00515208	0.219825
scaf63	1775001	0.00589046	0.219825
scaf25	8500001	0.00545425	0.219928
scaf36	3275001	0.00435926	0.219945
scaf11	6100001	0.00394763	0.219974
scaf76	425001	0.00438194	0.219978
scaf19	6825001	0.0054455	0.219978
scaf168	400001	0.00487979	0.220092
scaf22	2450001	0.00552683	0.220113
scaf30	7575001	0.00567369	0.220415
scaf75	2275001	0.00606056	0.220416
scaf21	1375001	0.00442847	0.220437
scaf27	1100001	0.00609628	0.220525
scaf32	2850001	0.00599183	0.220532
scaf40	100001	0.00501636	0.220598
scaf63	3500001	0.00382115	0.220666
scaf70	2200001	0.00439001	0.2207
scaf248	175001	0.00596997	0.220817
scaf13	15825001	0.00494293	0.220824
scaf69	2950001	0.00585049	0.220864
scaf10	3250001	0.00524245	0.22093
scaf52	1000001	0.00510849	0.220988
scaf95	1150001	0.00466831	0.220999
scaf64	1000001	0.00539191	0.221102
scaf36	1375001	0.00517371	0.22112
scaf35	800001	0.0053316	0.221179
scaf117	525001	0.00601502	0.221187
scaf159	650001	0.00488377	0.221259
scaf69	2275001	0.00616158	0.221265
scaf51	675001	0.00429433	0.221302
scaf106	1025001	0.00522394	0.221407
scaf126	625001	0.00511479	0.221425
scaf92	150001	0.00550223	0.221454
scaf92	125001	0.00616243	0.221459
scaf87	1900001	0.00663939	0.221474
scaf22	13075001	0.00521513	0.221489
scaf333	25001	0.00374441	0.221521
scaf57	4100001	0.00512292	0.221609
scaf117	1325001	0.00535298	0.221681
scaf63	3825001	0.00614485	0.22185
scaf10	8525001	0.00577575	0.221933
scaf105	150001	0.00515356	0.221967
scaf69	3700001	0.00559431	0.222056
scaf10	1	0.0057274	0.222135
scaf45	2100001	0.00582943	0.222137
scaf10	3625001	0.00577054	0.22215
scaf185	300001	0.00682185	0.222161
scaf35	4875001	0.0058496	0.222234
scaf71	1275001	0.00495203	0.222255
scaf50	450001	0.00644193	0.222266
scaf226	50001	0.00534248	0.222286
scaf186	500001	0.00466143	0.222393
scaf68	175001	0.00383269	0.222597
scaf111	475001	0.00513432	0.222716
scaf59	4375001	0.00483728	0.222822
scaf164	650001	0.0051963	0.223167
scaf26	3525001	0.00500179	0.22319
scaf35	125001	0.0051799	0.223206
scaf25	12225001	0.00591322	0.223223
scaf32	1075001	0.00484554	0.223237
scaf102	275001	0.00560467	0.223388
scaf45	2750001	0.00562202	0.223404
scaf23	12750001	0.00536227	0.223554
scaf72	3550001	0.00523981	0.2236
scaf70	2400001	0.00535369	0.223613
scaf11	275001	0.00519349	0.223626
scaf89	1025001	0.00457776	0.223651
scaf22	12575001	0.00585304	0.223675
scaf104	825001	0.00489136	0.223694
scaf45	1100001	0.00525021	0.223863
scaf13	2475001	0.00626534	0.223864
scaf19	8600001	0.00466809	0.223984
scaf86	600001	0.00612491	0.224045
scaf45	975001	0.00502113	0.224074
scaf59	3425001	0.00508607	0.224198
scaf275	25001	0.00656387	0.224202
scaf177	225001	0.00506348	0.224218
scaf38	4125001	0.00479374	0.224266
scaf15	3350001	0.00471918	0.224611
scaf95	1225001	0.00515799	0.224759
scaf187	375001	0.00481827	0.224791
scaf25	4225001	0.00486189	0.224869
scaf177	450001	0.00489234	0.224876
scaf92	25001	0.00534417	0.225
scaf11	4150001	0.00673647	0.225025
scaf57	3325001	0.00585306	0.225155
scaf24	3200001	0.00519424	0.225168
scaf83	2700001	0.00485838	0.225199
scaf70	2175001	0.00418438	0.225225
scaf96	550001	0.00544672	0.22536
scaf84	2550001	0.00546561	0.225411
scaf19	6675001	0.00527184	0.225465
scaf18	15050001	0.00494656	0.225518
scaf124	700001	0.00544	0.225622
scaf10	4025001	0.00563063	0.22564
scaf52	475001	0.00527861	0.225724
scaf20	3675001	0.00576157	0.225738
scaf42	2500001	0.00470569	0.22574
scaf63	250001	0.0062432	0.225783
scaf24	3250001	0.00504888	0.2258
scaf35	625001	0.00502711	0.225827
scaf70	2775001	0.00472426	0.225833
scaf75	2150001	0.0066198	0.22586
scaf200	75001	0.00563751	0.225873
scaf64	2550001	0.00611643	0.225876
scaf86	825001	0.00651761	0.22593
scaf13	2350001	0.00559252	0.225972
scaf64	2025001	0.00624389	0.225997
scaf70	1875001	0.00536393	0.226017
scaf19	4175001	0.00510045	0.226076
scaf11	6200001	0.00411749	0.226136
scaf124	1	0.00516448	0.226142
scaf26	975001	0.00542712	0.22621
scaf117	925001	0.00468939	0.226241
scaf14	17925001	0.0051597	0.226263
scaf102	725001	0.00544686	0.226341
scaf49	450001	0.00506073	0.226356
scaf18	15775001	0.00575322	0.226443
scaf60	2950001	0.00470511	0.226494
scaf63	3450001	0.00493402	0.22662
scaf71	800001	0.00513205	0.22671
scaf19	5100001	0.00557359	0.226859
scaf91	1575001	0.00674421	0.226903
scaf40	3175001	0.00524055	0.226995
scaf36	1900001	0.00586755	0.227074
scaf10	250001	0.0061571	0.227162
scaf19	8825001	0.00651845	0.227176
scaf15	13975001	0.00543923	0.227258
scaf31	4725001	0.00333843	0.227492
scaf80	1200001	0.00494609	0.227654
scaf30	6775001	0.00539733	0.227657
scaf153	675001	0.0052858	0.227696
scaf71	925001	0.00538754	0.227762
scaf164	725001	0.00541252	0.227766
scaf165	200001	0.0057859	0.227771
scaf71	975001	0.00501539	0.227964
scaf93	2300001	0.00547292	0.228077
scaf152	750001	0.00464996	0.228119
scaf230	225001	0.00570629	0.22828
scaf10	2350001	0.0062471	0.228368
scaf19	2125001	0.00486842	0.228369
scaf15	16525001	0.00494364	0.228419
scaf70	3500001	0.00500334	0.228517
scaf95	1075001	0.00614683	0.228571
scaf132	775001	0.00300036	0.228612
scaf84	875001	0.00506853	0.228697
scaf226	275001	0.00568921	0.228952
scaf134	550001	0.0056311	0.228974
scaf20	450001	0.00472055	0.228985
scaf70	2725001	0.00506263	0.229015
scaf70	450001	0.00504105	0.229089
scaf35	1725001	0.00564803	0.229147
scaf10	950001	0.00668944	0.22932
scaf34	7125001	0.00419655	0.229324
scaf119	75001	0.00524441	0.229423
scaf134	700001	0.00528426	0.22943
scaf35	525001	0.0047932	0.229458
scaf10	3850001	0.00499949	0.22949
scaf59	2000001	0.00572892	0.229495
scaf37	5975001	0.00545555	0.229648
scaf51	275001	0.00453317	0.229782
scaf63	1925001	0.00679976	0.229821
scaf36	4000001	0.00507237	0.229853
scaf71	2000001	0.00402973	0.229857
scaf22	2400001	0.00499198	0.229894
scaf156	300001	0.00553094	0.229944
scaf19	4625001	0.00629336	0.230053
scaf41	1725001	0.0046874	0.230253
scaf59	4675001	0.00498239	0.230364
scaf226	125001	0.00577215	0.230395
scaf324	75001	0.00383016	0.230448
scaf212	150001	0.00515368	0.230488
scaf36	5700001	0.00495231	0.230493
scaf25	11350001	0.00517563	0.230507
scaf82	375001	0.00566609	0.23063
scaf89	1725001	0.0041883	0.230681
scaf19	7500001	0.00573319	0.230705
scaf57	2775001	0.00525058	0.230712
scaf86	125001	0.00502375	0.230715
scaf70	2450001	0.00564306	0.230848
scaf116	475001	0.00540908	0.230929
scaf78	1275001	0.00574034	0.230948
scaf169	625001	0.00634086	0.231016
scaf19	3600001	0.00534265	0.231038
scaf339	25001	0.00533814	0.231059
scaf28	9625001	0.00627288	0.231059
scaf36	5550001	0.00535432	0.231184
scaf10	3075001	0.00635201	0.231212
scaf27	675001	0.00574266	0.231269
scaf22	12475001	0.00607846	0.231373
scaf22	13800001	0.00521941	0.231443
scaf63	2450001	0.00431343	0.23154
scaf13	1950001	0.0047125	0.231776
scaf95	1600001	0.00539121	0.231777
scaf10	5075001	0.00430621	0.232023
scaf12	18575001	0.00489835	0.23203
scaf15	7275001	0.00506275	0.232104
scaf49	900001	0.0059473	0.232116
scaf22	13100001	0.00489577	0.232118
scaf21	2850001	0.00446555	0.232157
scaf46	1125001	0.00526983	0.232167
scaf53	25001	0.00572728	0.232429
scaf89	1425001	0.00446271	0.232436
scaf53	4350001	0.00428291	0.232437
scaf10	4325001	0.00465533	0.232608
scaf10	225001	0.00595594	0.232631
scaf72	3200001	0.005906	0.232703
scaf72	4150001	0.00443802	0.232746
scaf87	150001	0.0064539	0.23279
scaf124	625001	0.00605623	0.232845
scaf18	16325001	0.00464412	0.232978
scaf223	75001	0.00509112	0.23305
scaf14	17625001	0.00525665	0.233138
scaf268	1	0.0055302	0.233158
scaf55	275001	0.00439244	0.233161
scaf48	4200001	0.00553339	0.233181
scaf36	1250001	0.00575047	0.233243
scaf30	8175001	0.005672	0.23337
scaf85	2125001	0.00528275	0.23339
scaf36	1975001	0.00604975	0.233436
scaf200	125001	0.00474364	0.233441
scaf25	11325001	0.00484525	0.23345
scaf21	2675001	0.00418065	0.233452
scaf119	200001	0.00502026	0.233481
scaf35	1700001	0.00586342	0.233504
scaf38	4750001	0.0049642	0.233595
scaf29	9375001	0.00578935	0.233771
scaf274	175001	0.00555628	0.233774
scaf355	75001	0.00547403	0.233908
scaf46	1425001	0.0055107	0.233944
scaf59	1075001	0.00499264	0.233955
scaf18	15600001	0.00537252	0.233983
scaf10	900001	0.00682998	0.233995
scaf57	3950001	0.00509567	0.234042
scaf186	475001	0.0048244	0.234113
scaf18	10900001	0.00553126	0.234214
scaf49	75001	0.00544424	0.234224
scaf95	250001	0.00641618	0.234239
scaf27	5950001	0.00671171	0.23425
scaf32	3050001	0.00553931	0.234328
scaf25	8300001	0.00649269	0.23437
scaf70	2650001	0.00523222	0.234427
scaf57	4400001	0.00597401	0.234535
scaf26	9550001	0.00485819	0.234548
scaf18	16300001	0.0055439	0.234654
scaf56	275001	0.00395776	0.234754
scaf36	2575001	0.00513268	0.234774
scaf153	475001	0.00443836	0.234825
scaf216	200001	0.00541185	0.234836
scaf36	4450001	0.00491515	0.234839
scaf46	625001	0.0043865	0.23489
scaf26	7475001	0.0044015	0.234954
scaf133	750001	0.00634127	0.234962
scaf36	4325001	0.00548583	0.234963
scaf91	2325001	0.00514952	0.235017
scaf45	625001	0.0053448	0.235144
scaf32	950001	0.00460944	0.23523
[truncated: 19,200 more rows]

## Sheet: Sheet3
Supplemental File S5. Minor allele frequency (MAF) and FST in consecutive 50-kb genomic windows with 25-kb step. For the San Juan River (SJR) population of fathead minnow samples, MAF was calculated for all sites with a minimum depth of 15 and at least two reads supporting a variant. FST was calculated for windows with at least 100 called variants, with samples of each Pimephales species consider…
Scaffold	Start coordinate	Average MAF per variable site	Average FST per variant site	Number of sites in window meeting MAF threshold
scaf1	1	0.00427757	0.464574	1578
scaf1	25001	0.0039452	0.499279	722
scaf1	50001	0.00487261	0.473616	1069
scaf1	100001	0.00489882	0.452392	884
scaf1	125001	0.00481077	0.462423	315
scaf1	150001	0.00501715	0.426051	2021
scaf1	175001	0.00479894	0.410838	1917
scaf1	200001	0.00572341	0.429493	1783
scaf1	225001	0.00540022	0.406594	1673
scaf1	250001	0.00519732	0.422079	1876
scaf1	275001	0.00575325	0.443671	2044
scaf1	300001	0.00520739	0.383163	1727
scaf1	325001	0.00503167	0.357006	1845
scaf1	350001	0.00561394	0.36569	1481
scaf1	375001	0.00518044	0.333959	1592
scaf1	450001	0.00462036	0.427594	627
scaf1	500001	0.00472991	0.384783	1735
scaf1	525001	0.00457124	0.396195	1441
scaf1	550001	0.00438056	0.459681	1905
scaf1	575001	0.00480991	0.44418	1880
scaf1	600001	0.00525206	0.410881	2068
scaf1	625001	0.00454394	0.434396	1769
scaf1	650001	0.00507999	0.46503	1767
scaf1	675001	0.00520713	0.459135	2008
scaf1	700001	0.00532802	0.424146	2124
scaf1	725001	0.00514274	0.423546	1981
scaf1	750001	0.0056012	0.406776	1632
scaf1	775001	0.00549037	0.334218	2135
scaf1	800001	0.00488963	0.588986	1157
scaf1	825001	0.00593649	0.544835	682
scaf1	850001	0.00442506	0.49438	1700
scaf1	875001	0.00460586	0.475279	2204
scaf1	900001	0.00451619	0.499595	2207
scaf1	925001	0.00462688	0.515302	1660
scaf1	950001	0.00466078	0.479334	1671
scaf1	975001	0.00443693	0.488699	2082
scaf1	1000001	0.00473092	0.526603	920
scaf1	1025001	0.00479263	0.536534	1339
scaf1	1050001	0.00488903	0.489252	1833
scaf1	1075001	0.00490905	0.456563	1395
scaf1	1100001	0.00489532	0.526479	2500
scaf1	1125001	0.00477577	0.526387	1843
scaf1	1150001	0.00493209	0.50927	2059
scaf1	1175001	0.00504312	0.539343	2616
scaf1	1200001	0.00465071	0.56576	2482
scaf1	1225001	0.0047671	0.554488	1873
scaf1	1250001	0.00525555	0.533309	2453
scaf1	1275001	0.00478667	0.55482	2746
scaf1	1300001	0.00470299	0.541512	2213
scaf1	1325001	0.00521909	0.574372	2240
scaf1	1350001	0.00486136	0.595532	1471
scaf1	1375001	0.00466124	0.547608	2182
scaf1	1400001	0.00384169	0.577743	745
scaf1	1425001	0.00419827	0.582183	819
scaf1	1450001	0.00407233	0.59714	2302
scaf1	1475001	0.00441507	0.618126	1178
scaf1	1500001	0.00413666	0.564004	2212
scaf1	1525001	0.00379462	0.576118	2702
scaf1	1550001	0.00541601	0.571585	2146
scaf1	1575001	0.00494397	0.460726	2398
scaf1	3750001	0.00306819	0.603759	1945
scaf1	3775001	0.0029869	0.571037	665
scaf1	3800001	0.00438901	0.540193	2436
scaf1	3825001	0.00374379	0.526334	2421
scaf1	3850001	0.00446963	0.509164	1822
scaf1	3875001	0.00424776	0.500673	1958
scaf1	3900001	0.0052024	0.524045	2054
scaf1	3925001	0.00481686	0.552928	2097
scaf1	3950001	0.00539403	0.49654	1609
scaf1	3975001	0.00515568	0.399119	1840
scaf1	4000001	0.00500647	0.323102	1121
scaf1	4025001	0.00581509	0.370537	1340
scaf1	4050001	0.00576118	0.332054	1342
scaf1	4075001	0.00482301	0.393945	1283
scaf1	4100001	0.00471776	0.369542	1781
scaf1	4125001	0.00555679	0.400861	1508
scaf1	4150001	0.00369114	0.570827	2077
scaf1	4175001	0.0043041	0.62048	2048
scaf1	4200001	0.00489344	0.53061	1416
scaf1	4225001	0.00429619	0.445087	2067
scaf1	4250001	0.00455711	0.457984	426
scaf1	4275001	0.00444059	0.540087	749
scaf1	4300001	0.00483341	0.453733	1502
scaf1	4325001	0.00444526	0.451396	507
scaf1	4350001	0.00459615	0.53228	2351
scaf1	4375001	0.00460732	0.557505	2023
scaf1	4400001	0.00493789	0.53464	1597
scaf1	4500001	0.00441657	0.418555	1041
scaf1	4525001	0.00469157	0.419205	369
scaf1	4550001	0.00548568	0.459531	2092
scaf1	4575001	0.00520899	0.510676	1719
scaf1	4600001	0.00434838	0.559575	2403
scaf1	4625001	0.00509319	0.567219	2160
scaf1	4650001	0.00463153	0.514545	1795
scaf1	4675001	0.00421868	0.543032	2243
scaf1	4700001	0.00448047	0.532372	2067
scaf1	4725001	0.00422125	0.473515	1978
scaf1	4750001	0.0049433	0.50495	2197
scaf1	4775001	0.00490219	0.534412	2015
scaf1	4800001	0.00496205	0.532773	2304
scaf1	4825001	0.00515333	0.536977	2227
scaf1	4850001	0.00466548	0.562249	2442
scaf1	4875001	0.00472613	0.583387	2322
scaf1	4900001	0.00458655	0.487888	1755
scaf1	4925001	0.00423578	0.463246	1982
scaf1	4950001	0.00495953	0.517927	1960
scaf1	4975001	0.00510086	0.518069	2158
scaf1	5000001	0.00490352	0.452449	768
scaf1	5025001	0.00503631	0.379344	1431
scaf1	5050001	0.00548546	0.428458	1373
scaf1	5075001	0.00524968	0.466296	837
scaf1	5100001	0.00551291	0.441053	1569
scaf1	5125001	0.00539224	0.332368	1849
scaf1	5175001	0.00574421	0.380513	538
scaf1	5300001	0.00424039	0.47462	1500
scaf1	5325001	0.00351683	0.374537	291
scaf1	5350001	0.00448266	0.325443	1702
scaf1	5375001	0.00448953	0.39413	2297
scaf1	5400001	0.00443442	0.475108	2089
scaf1	5425001	0.0042247	0.434	1495
scaf1	5450001	0.00482746	0.335017	1837
scaf1	5475001	0.0048466	0.464301	2083
scaf1	5500001	0.00416673	0.470994	2330
scaf1	5525001	0.00424126	0.422724	2091
scaf1	5550001	0.00442658	0.470572	2637
scaf1	5575001	0.00425351	0.491694	2462
scaf1	5600001	0.0047926	0.459427	1944
scaf1	5625001	0.00476288	0.491811	2397
scaf1	5650001	0.00465065	0.479301	1895
scaf1	5675001	0.0046095	0.396491	2081
scaf1	5700001	0.00460919	0.419445	1263
scaf1	5725001	0.00480726	0.375239	1712
scaf1	5750001	0.00500232	0.314814	1143
scaf1	5775001	0.00448131	0.343375	697
scaf1	5800001	0.00431266	0.378364	489
scaf1	5875001	0.00329519	0.452503	61
scaf1	5900001	0.00237436	0.432781	870
scaf1	5950001	0.00374777	0.404934	1000
scaf1	5975001	0.00328607	0.4522	270
scaf1	6000001	0.0041528	0.437224	1794
scaf1	6025001	0.00420361	0.390933	1777
scaf1	6050001	0.00382096	0.443031	1785
scaf1	6075001	0.00382213	0.506159	1641
scaf1	6100001	0.00435814	0.497896	2086
scaf1	6125001	0.00425468	0.503688	2094
scaf1	6150001	0.00388745	0.52402	1679
scaf1	6175001	0.00406969	0.550465	1639
scaf1	6200001	0.0053159	0.504423	2439
scaf1	6225001	0.00456779	0.439836	2231
scaf1	6250001	0.00484277	0.414254	2497
scaf1	6275001	0.0051184	0.402965	2432
scaf1	6300001	0.00285612	0.476256	1578
scaf1	6325001	0.00432827	0.483867	1670
scaf1	6350001	0.00279742	0.471975	1332
scaf1	6425001	0.00357804	0.508425	254
scaf1	6450001	0.00498713	0.504006	1332
scaf1	6475001	0.00564296	0.498057	568
scaf1	6575001	0.0101087	0.557498	9
scaf1	6600001	0.0048131	0.438043	1929
scaf1	6625001	0.0039995	0.337865	929
scaf1	6650001	0.00513091	0.427366	1978
scaf1	6675001	0.005408	0.440757	1901
scaf1	6700001	0.00607903	0.387033	2114
scaf1	6725001	0.00548868	0.375699	2234
scaf1	6750001	0.00492848	0.390252	1241
scaf1	6775001	0.00623683	0.463696	1423
scaf1	6800001	0.0048024	0.511484	2084
scaf1	6825001	0.00473931	0.442767	1845
scaf1	6850001	0.0054417	0.39993	1807
scaf1	6875001	0.00502277	0.403592	2023
scaf1	6900001	0.00491519	0.386935	1589
scaf1	6925001	0.00496922	0.409748	1484
scaf1	6950001	0.00503237	0.443882	1995
scaf1	6975001	0.00529701	0.447497	1794
scaf1	7000001	0.00484143	0.433834	2192
scaf1	7025001	0.00478314	0.474736	2193
scaf1	7050001	0.0040377	0.568003	1769
scaf1	7075001	0.00451021	0.561885	1847
scaf1	7100001	0.00482956	0.521819	2656
scaf1	7125001	0.00433149	0.49765	2406
scaf1	7150001	0.00449469	0.52026	2249
scaf1	7175001	0.0051642	0.532921	2251
scaf1	7200001	0.00465485	0.459779	2016
scaf1	7225001	0.00416745	0.420817	2244
scaf1	7250001	0.00477975	0.400639	2204
scaf1	7275001	0.00452685	0.373358	1978
scaf1	7300001	0.0044902	0.475689	2112
scaf1	7325001	0.00525901	0.545093	2319
scaf1	7350001	0.00471036	0.509715	2268
scaf1	7375001	0.00420809	0.428566	2570
scaf1	7400001	0.00441818	0.410587	1818
scaf1	7425001	0.0046104	0.437492	1745
scaf1	7450001	0.00453502	0.515238	1731
scaf1	7475001	0.00458782	0.533195	1814
scaf1	7500001	0.00372367	0.443658	1570
scaf1	7525001	0.00412375	0.432407	1365
scaf1	7550001	0.00441593	0.524367	2197
scaf1	7575001	0.00410045	0.533774	1920
scaf1	7600001	0.00409053	0.498517	2345
scaf1	7625001	0.004183	0.480329	2413
scaf1	7650001	0.00447621	0.522261	2306
scaf1	7675001	0.00470809	0.534507	2108
scaf1	7700001	0.00505069	0.459193	1792
scaf1	7725001	0.00407923	0.454085	2300
scaf1	7750001	0.00383094	0.458211	1965
scaf1	7775001	0.00435186	0.494181	1611
scaf1	7800001	0.00350602	0.532724	1880
scaf1	7825001	0.00428971	0.504381	2150
scaf1	7850001	0.00262568	0.529846	1887
scaf1	7875001	0.00269988	0.49872	1538
scaf1	7900001	0.003248	0.498789	2186
scaf1	7925001	0.00280403	0.549183	2464
scaf1	7950001	0.00360102	0.434776	2028
scaf1	7975001	0.00349511	0.303704	1909
scaf1	8000001	0.00339982	0.344449	2059
scaf1	8025001	0.00367499	0.474636	2182
scaf1	8050001	0.00310362	0.545925	2424
scaf1	8075001	0.00320072	0.483492	1961
scaf1	8100001	0.00329545	0.376098	1486
scaf1	8125001	0.00327545	0.462165	2385
scaf1	8150001	0.00383421	0.448255	2281
scaf1	8175001	0.00331825	0.364866	1572
scaf1	8200001	0.00335916	0.419271	2009
scaf1	8225001	0.00362729	0.450404	2176
scaf1	8250001	0.00491363	0.433512	2312
scaf1	8275001	0.00408302	0.45922	2232
scaf1	8300001	0.00485993	0.411922	2379
scaf1	8325001	0.0046068	0.480806	2350
scaf1	8350001	0.00488991	0.482211	1967
scaf1	8375001	0.00529123	0.439193	2178
scaf1	8400001	0.00372966	0.530926	1818
scaf1	8425001	0.00435084	0.587746	1980
scaf1	8450001	0.00530284	0.467779	524
scaf1	8475001	0.00410065	0.455144	959
scaf1	8500001	0.00535851	0.442814	603
scaf1	8525001	0.00501803	0.288586	833
scaf1	8550001	0.00591427	0.243017	518
scaf1	8575001	0.00605807	0.403201	335
scaf1	8600001	0.00512314	0.447076	969
scaf1	8625001	0.00544249	0.427136	847
scaf1	8650001	0.00476547	0.381741	1017
scaf1	8675001	0.00492698	0.336544	988
scaf1	8775001	0.00635645	0.471579	31
scaf1	8800001	0.0049365	0.277183	980
scaf1	8825001	0.00515696	0.275572	896
scaf1	8875001	0.00519404	0.221789	861
scaf1	8900001	0.00504583	0.366017	1151
scaf1	8925001	0.00468633	0.404388	466
scaf1	8950001	0.00569056	0.352717	675
scaf1	9175001	0.330592	0.441739	2
scaf1	9200001	0.00596148	0.387464	1029
scaf1	9225001	0.00608915	0.339421	884
scaf1	9250001	0.00550675	0.388841	912
scaf1	9275001	0.0058655	0.491161	998
scaf1	9300001	0.00461424	0.491083	1015
scaf1	9325001	0.00519267	0.450715	754
scaf1	9350001	0.00513401	0.44175	1416
scaf1	9375001	0.00469278	0.373981	1261
scaf1	9400001	0.0056745	0.321474	1468
scaf1	9425001	0.00517145	0.3666	1683
scaf1	9450001	0.00525889	0.357027	1557
scaf1	9475001	0.00603909	0.352991	1446
scaf1	9500001	0.00479925	0.48455	1000
scaf1	9525001	0.00491067	0.435794	1105
scaf1	9550001	0.00452593	0.339532	805
scaf1	9575001	0.00452627	0.408254	1161
scaf1	9600001	0.00513215	0.480095	1902
scaf1	9625001	0.0051752	0.508023	1195
scaf1	9650001	0.00540604	0.507484	2337
scaf1	9675001	0.00545147	0.488411	2163
scaf1	9700001	0.00564378	0.485336	2307
scaf1	9725001	0.0056722	0.482183	2187
scaf1	9750001	0.00516749	0.474129	1974
scaf1	9775001	0.00510654	0.53212	2255
scaf1	9800001	0.0045114	0.534347	2605
scaf1	9825001	0.00482124	0.518536	2199
scaf1	9850001	0.00462812	0.483921	2277
scaf1	9875001	0.00461595	0.438873	2626
scaf1	9900001	0.00497765	0.498065	2241
scaf1	9925001	0.00471635	0.564067	1772
scaf1	9950001	0.00422638	0.558106	2309
scaf1	9975001	0.00449624	0.518032	2953
scaf1	10000001	0.00403795	0.507902	1901
scaf1	10025001	0.00422921	0.467114	1811
scaf1	10050001	0.00484375	0.414888	2181
scaf1	10075001	0.00423861	0.453464	1986
scaf1	10100001	0.00429663	0.576278	2415
scaf1	10125001	0.00476633	0.600258	2256
scaf1	10150001	0.00382118	0.524343	1991
scaf1	10175001	0.00410166	0.503215	2211
scaf1	10200001	0.00438998	0.525286	2388
scaf1	10225001	0.00405964	0.531531	2334
scaf1	10250001	0.00410289	0.519827	2084
scaf1	10275001	0.00457035	0.530891	2033
scaf1	10300001	0.00495415	0.547012	2157
scaf1	10325001	0.00442059	0.518239	2060
scaf1	10350001	0.00403276	0.375852	768
scaf1	10375001	0.00463989	0.46897	1539
scaf1	10400001	0.00411559	0.547733	1679
scaf1	10425001	0.00423234	0.545412	1146
scaf1	10450001	0.00435325	0.498961	1974
scaf1	10475001	0.00383684	0.454295	1999
scaf1	10500001	0.00434379	0.496329	2369
scaf1	10525001	0.0046808	0.484171	2021
scaf1	10550001	0.00453645	0.461603	1348
scaf1	10575001	0.00445226	0.492842	1712
scaf1	10600001	0.00484449	0.51018	2020
scaf1	10625001	0.00446172	0.495306	1916
scaf1	10650001	0.00517672	0.468249	2145
scaf1	10675001	0.00499648	0.503082	2268
scaf1	10700001	0.00475667	0.498747	1983
scaf1	10725001	0.00532054	0.472781	2122
scaf1	10850001	0.00530213	0.468034	914
scaf1	10875001	0.00450542	0.532461	25
scaf1	10900001	0.00439052	0.555514	1852
scaf1	10925001	0.00491267	0.536504	1901
scaf1	10950001	0.00495884	0.46946	2158
scaf1	10975001	0.00470278	0.381831	2068
scaf1	11000001	0.00524816	0.42938	1539
scaf1	11025001	0.00508416	0.509396	1819
scaf1	11050001	0.00528187	0.500477	1871
scaf1	11075001	0.00521393	0.495789	1646
scaf1	11100001	0.00508403	0.519126	2070
scaf1	11125001	0.00534674	0.524444	1997
scaf1	11150001	0.00475939	0.516187	1588
scaf1	11175001	0.00481095	0.485673	1542
scaf1	11200001	0.00469455	0.488126	1318
scaf1	11225001	0.00469067	0.519635	1486
scaf1	11250001	0.00497576	0.481578	1867
scaf1	11275001	0.00470894	0.4787	1515
scaf1	11300001	0.00458843	0.468316	1930
scaf1	11325001	0.00482607	0.434906	2399
scaf1	11350001	0.00495398	0.435803	2064
scaf1	11375001	0.00471047	0.419967	1591
scaf1	11400001	0.00508396	0.441067	1765
scaf1	11425001	0.00498174	0.457385	2180
scaf1	11450001	0.00494756	0.43702	1531
scaf1	11475001	0.00504322	0.451659	1493
scaf1	11500001	0.00457259	0.530635	2127
scaf1	11525001	0.00531999	0.513855	1791
scaf1	11550001	0.00413702	0.469583	2167
scaf1	11575001	0.00415454	0.446249	2310
scaf1	11600001	0.00492872	0.37299	2099
scaf1	11625001	0.00427728	0.412298	2069
scaf1	11650001	0.00424472	0.505598	1415
scaf1	11675001	0.00499417	0.47387	1501
scaf1	11700001	0.00489726	0.492478	2007
scaf1	11725001	0.00476257	0.544115	1954
scaf1	11750001	0.00452451	0.470354	826
scaf1	11775001	0.00418287	0.492084	1364
scaf1	11800001	0.0052682	0.48852	1558
scaf1	11825001	0.00507383	0.478315	1320
scaf1	11850001	0.00545848	0.388666	2087
scaf1	11875001	0.00511283	0.354857	1685
scaf1	11900001	0.00457405	0.463604	1602
scaf1	11925001	0.00516325	0.45237	2030
scaf1	11950001	0.00475107	0.395677	1867
scaf1	11975001	0.00462552	0.412552	1555
scaf1	12000001	0.00512464	0.401516	1872
scaf1	12025001	0.0052887	0.377906	2023
scaf1	12050001	0.00542234	0.38401	2077
scaf1	12075001	0.00486702	0.380674	1986
scaf1	12100001	0.00479355	0.358441	2180
scaf1	12125001	0.00541453	0.407203	1971
scaf1	12150001	0.00524068	0.450737	1948
scaf1	12175001	0.00495492	0.453081	2259
scaf1	12200001	0.00447988	0.425948	1866
scaf1	12225001	0.00501065	0.394552	1851
scaf1	12250001	0.00500128	0.420913	1408
scaf1	12275001	0.00463219	0.420026	1941
scaf1	12300001	0.0054561	0.438908	2033
scaf1	12325001	0.00520676	0.463043	1502
scaf1	12350001	0.00478007	0.503098	2072
scaf1	12375001	0.00502521	0.509652	1738
scaf1	12400001	0.00485984	0.529932	1951
scaf1	12425001	0.00500591	0.514972	2049
scaf1	12450001	0.00533071	0.395662	1793
scaf1	12475001	0.00516951	0.404129	1905
scaf1	12500001	0.0049169	0.462305	1226
scaf1	12525001	0.00492738	0.35123	2091
scaf1	12550001	0.00546638	0.38839	1545
scaf1	12575001	0.00546041	0.515537	977
scaf1	12600001	0.00460432	0.530887	1958
scaf1	12625001	0.00519497	0.440816	1649
scaf1	12650001	0.00534811	0.427918	1919
scaf1	12675001	0.0048257	0.513113	2004
scaf1	12700001	0.00527975	0.519875	1880
scaf1	12725001	0.00533698	0.487137	1780
scaf1	12750001	0.00570573	0.451769	2155
scaf1	12775001	0.00550869	0.366903	2222
scaf1	12800001	0.0054258	0.442489	1522
scaf1	12825001	0.00573816	0.500936	1627
scaf1	12850001	0.00444439	0.4907	555
scaf1	12875001	0.00506147	0.492041	935
scaf1	12900001	0.00535114	0.491159	2147
scaf1	12925001	0.00522876	0.512021	1465
scaf1	12950001	0.00540006	0.508545	1926
scaf1	12975001	0.00523594	0.453568	2046
scaf1	13000001	0.00529327	0.42638	1542
scaf1	13025001	0.00551117	0.443729	2004
scaf1	13050001	0.00586162	0.472387	1977
scaf1	13075001	0.00520624	0.507823	1485
scaf1	13100001	0.00484784	0.458576	2052
scaf1	13125001	0.00538301	0.506837	1991
scaf1	13150001	0.00549782	0.559744	2406
scaf1	13175001	0.00531136	0.517674	2429
scaf1	13200001	0.00474995	0.464393	1915
scaf1	13225001	0.00487345	0.438417	1935
scaf1	13250001	0.00561479	0.472625	1317
scaf1	13275001	0.0052044	0.461029	1617
scaf1	13300001	0.00503036	0.428058	897
scaf1	13325001	0.00574154	0.402974	1220
scaf1	13350001	0.00540569	0.368452	1297
scaf1	13375001	0.00464912	0.413371	1131
scaf1	13400001	0.00549152	0.361587	1049
scaf1	13425001	0.00568898	0.318826	1212
scaf1	13450001	0.00516064	0.375668	1201
scaf1	13475001	0.00542883	0.409579	920
scaf1	13500001	0.00544072	0.446281	1418
scaf1	13525001	0.00561695	0.497442	1328
scaf1	13550001	0.00584836	0.424859	1769
scaf1	13575001	0.00504911	0.405623	1592
scaf1	13600001	0.00498494	0.471257	1515
scaf1	13625001	0.00593431	0.393487	1676
scaf1	13650001	0.00522893	0.442575	1559
scaf1	13675001	0.00487262	0.488686	1747
scaf1	13700001	0.00573749	0.393659	403
scaf1	13750001	0.00598882	0.316095	387
scaf1	13775001	0.00833947	0.373999	37
scaf1	13800001	0.00667986	0.403399	1349
scaf1	13825001	0.00672691	0.38288	1069
scaf1	13850001	0.00579352	0.417305	1631
scaf1	13875001	0.00628564	0.471766	1477
scaf1	13900001	0.00486385	0.490912	1816
scaf1	13925001	0.00484802	0.527464	1710
scaf1	13950001	0.00510734	0.540841	1540
scaf1	13975001	0.00504382	0.508611	1781
scaf1	14000001	0.00505766	0.441686	1824
scaf1	14025001	0.00504195	0.414652	1479
scaf1	14050001	0.00593208	0.420542	1618
scaf1	14075001	0.00571136	0.418129	1840
scaf1	14100001	0.00509026	0.439906	1426
scaf1	14125001	0.00533637	0.452119	1311
scaf1	14150001	0.00531898	0.472648	1654
scaf1	14175001	0.00511055	0.516943	1478
scaf1	14200001	0.00502828	0.4864	1505
scaf1	14225001	0.00504007	0.493467	1929
scaf1	14250001	0.0049513	0.511774	1984
scaf1	14275001	0.00508235	0.500098	1671
scaf1	14300001	0.00575101	0.457427	1654
scaf1	14325001	0.00556721	0.330068	1958
scaf1	14350001	0.00479291	0.462968	1241
scaf1	14375001	0.00531652	0.54067	1102
scaf1	14400001	0.00536875	0.48025	1898
scaf1	14425001	0.00493824	0.420041	1678
scaf1	14450001	0.00491954	0.40668	1963
scaf1	14475001	0.00545092	0.406816	1995
scaf1	14500001	0.00550038	0.432543	1583
scaf1	14525001	0.00502278	0.45127	1811
scaf1	14550001	0.00524458	0.420559	2000
scaf1	14575001	0.00555618	0.464806	2043
scaf1	14600001	0.00441201	0.481781	1450
scaf1	14625001	0.00415383	0.458279	1605
scaf1	14650001	0.00498622	0.422754	1740
scaf1	14675001	0.00461082	0.354521	1460
scaf1	14700001	0.00537416	0.399558	1906
scaf1	14725001	0.00576663	0.429142	1726
scaf1	14750001	0.00588104	0.40393	1454
scaf1	14775001	0.00553422	0.400249	1713
scaf1	14800001	0.00490225	0.464542	1978
scaf1	14825001	0.00550133	0.542432	1628
scaf1	14850001	0.00466896	0.588165	2052
scaf1	14875001	0.00457885	0.590648	2038
scaf1	14900001	0.00586506	0.421129	541
scaf1	14925001	0.00455878	0.490074	1135
scaf1	14950001	0.0048307	0.494721	1906
scaf1	14975001	0.00523162	0.510311	1563
scaf1	15000001	0.0045474	0.554535	2375
scaf1	15025001	0.00473422	0.525198	2205
scaf1	15050001	0.00486942	0.444863	1586
scaf1	15075001	0.00440463	0.461033	1735
scaf1	15100001	0.00540543	0.474831	1845
scaf1	15125001	0.00550707	0.444985	1794
scaf1	15150001	0.00552595	0.442978	1850
scaf1	15175001	0.00531807	0.434987	2012
scaf1	15200001	0.00517799	0.432211	1929
scaf1	15225001	0.0056254	0.42393	1654
scaf1	15250001	0.0047852	0.382043	1576
scaf1	15275001	0.00492376	0.405486	1932
scaf1	15300001	0.00544339	0.409598	2008
scaf1	15325001	0.00494267	0.41533	1535
scaf1	15350001	0.00475959	0.493986	2168
scaf1	15375001	0.00525872	0.515577	2350
scaf1	15400001	0.00465298	0.515366	977
scaf1	15425001	0.00454561	0.508446	1340
scaf1	15450001	0.00479193	0.518903	1738
scaf1	15475001	0.00477478	0.550448	1586
scaf1	15500001	0.00466715	0.489013	2239
scaf1	15525001	0.00458762	0.432087	1899
scaf1	15550001	0.00555678	0.474897	2069
scaf1	15575001	0.00521548	0.463939	2038
scaf1	15600001	0.00546862	0.443244	2093
scaf1	15625001	0.00546792	0.495782	2093
scaf1	15650001	0.00472971	0.512059	1655
scaf1	15675001	0.00515474	0.534401	2237
scaf1	15700001	0.00457259	0.56447	2364
scaf1	15725001	0.00410742	0.540709	1767
scaf1	15750001	0.00516783	0.53608	2751
scaf1	15775001	0.00501635	0.536806	2418
scaf1	15800001	0.00534564	0.521929	2205
scaf1	15825001	0.00542224	0.535793	2702
scaf1	15850001	0.00453821	0.517041	1991
scaf1	15875001	0.00496598	0.493599	2036
scaf1	15900001	0.00405927	0.502108	2330
scaf1	15925001	0.00388343	0.44833	2101
scaf1	15950001	0.00437233	0.454136	2048
scaf1	15975001	0.00454597	0.512792	1960
scaf1	16000001	0.00477048	0.498584	1984
scaf1	16025001	0.00432308	0.539324	2385
scaf1	16050001	0.00443998	0.51361	2395
scaf1	16075001	0.004525	0.410206	2112
scaf1	16100001	0.00522629	0.3848	1897
scaf1	16125001	0.00528078	0.456844	2243
scaf1	16150001	0.00409117	0.51187	1952
scaf1	16175001	0.00444781	0.527531	1870
scaf1	16200001	0.00380127	0.568457	1946
scaf1	16225001	0.00384443	0.57645	1970
scaf1	16250001	0.0047567	0.530327	2106
scaf1	16275001	0.00434237	0.468423	2038
scaf1	16300001	0.00488377	0.457185	1640
scaf1	16325001	0.00482877	0.477057	1668
scaf1	16350001	0.00497733	0.496284	2036
scaf1	16375001	0.00505235	0.53834	1956
scaf1	16400001	0.00460032	0.549033	1961
scaf1	16425001	0.00462342	0.526274	1995
scaf1	16450001	0.00410768	0.531713	2243
scaf1	16475001	0.00436483	0.523609	2018
scaf1	16500001	0.00452187	0.504004	2159
scaf1	16525001	0.00437494	0.519195	2323
scaf1	16550001	0.00396559	0.550668	2212
scaf1	16575001	0.00414633	0.540941	2221
scaf1	16600001	0.00512559	0.502323	2425
scaf1	16625001	0.00443582	0.497081	2107
scaf1	16650001	0.00495069	0.550504	2532
scaf1	16675001	0.00549228	0.589164	2519
scaf1	16700001	0.0046148	0.519017	2087
scaf1	16725001	0.00452285	0.522819	2552
scaf1	16750001	0.00463579	0.582937	2214
scaf1	16775001	0.00446812	0.529651	1918
scaf1	16800001	0.00473901	0.500156	2170
scaf1	16825001	0.00488328	0.486518	2251
scaf1	16850001	0.00433127	0.524367	2141
scaf1	16875001	0.00455944	0.579795	2045
scaf1	16900001	0.00458006	0.584744	1662
scaf1	16925001	0.00436183	0.589727	1728
scaf1	16950001	0.00446242	0.582578	1766
scaf1	16975001	0.00438897	0.55033	1909
scaf1	17000001	0.00434808	0.524267	2097
scaf1	17025001	0.00467259	0.478926	1943
scaf1	17050001	0.00458646	0.488726	2123
scaf1	17075001	0.00442007	0.530182	2075
scaf1	17100001	0.00474736	0.532534	2061
scaf1	17125001	0.00462129	0.492586	2106
scaf1	17150001	0.00458553	0.507088	2483
scaf1	17175001	0.00449839	0.536722	2412
scaf1	17200001	0.00428246	0.510581	1975
scaf1	17225001	0.00447585	0.492084	2288
scaf1	17275001	0.00434023	0.499523	1029
scaf1	17300001	0.00535563	0.487076	1466
scaf1	17325001	0.00596615	0.461919	567
scaf1	17350001	0.00509196	0.443563	1010
scaf1	17400001	0.00508568	0.394938	1066
scaf1	17425001	0.00411049	0.318832	286
scaf1	17450001	0.00552762	0.363734	2029
scaf1	17475001	0.00559933	0.520214	1998
scaf1	17500001	0.00485612	0.571065	2413
scaf1	17525001	0.00523129	0.556615	2186
scaf1	17550001	0.00467444	0.526273	2118
scaf1	17575001	0.00453089	0.519442	2073
scaf1	17600001	0.00458068	0.537669	2184
scaf1	17625001	0.00462522	0.575063	2205
scaf1	17650001	0.00457214	0.599423	2170
scaf1	17675001	0.00446439	0.544942	2084
scaf1	17700001	0.00489966	0.549442	2429
scaf1	17725001	0.0048495	0.589717	2344
scaf1	17750001	0.00418196	0.487638	2052
scaf1	17775001	0.0046534	0.463807	2617
scaf1	17800001	0.00495347	0.530243	2591
scaf1	17825001	0.00449366	0.533611	1873
scaf1	17850001	0.00463154	0.54907	2387
scaf1	17875001	0.00476092	0.575675	2452
scaf1	17900001	0.00492812	0.566051	2383
scaf1	17925001	0.0048832	0.533101	2687
scaf1	17950001	0.00518623	0.477072	2385
scaf1	17975001	0.00488621	0.430703	2404
scaf1	18000001	0.00506079	0.463471	2336
scaf1	18025001	0.00530055	0.453276	2246
scaf1	18050001	0.00535849	0.498243	2014
scaf1	18075001	0.00529553	0.512794	2161
scaf1	18100001	0.00452231	0.479841	2331
scaf1	18125001	0.00485691	0.52398	2338
scaf1	18150001	0.00472358	0.552675	2198
scaf1	18175001	0.00446887	0.571409	2156
scaf1	18200001	0.00403379	0.546551	2319
scaf1	18225001	0.0042568	0.550792	2338
scaf1	18250001	0.00502945	0.55018	2799
scaf1	18275001	0.00472669	0.489423	2376
scaf1	18300001	0.00536094	0.426588	2207
scaf1	18325001	0.0049963	0.48571	2596
scaf1	18350001	0.00447429	0.509575	2062
scaf1	18375001	0.00550368	0.48486	2360
scaf1	18400001	0.00396022	0.496967	2411
scaf1	18425001	0.00367917	0.569215	1942
scaf1	18450001	0.00434743	0.580824	2430
scaf1	18475001	0.0040539	0.521037	2733
scaf1	18500001	0.00498762	0.537725	2426
scaf1	18525001	0.00499492	0.533294	2193
scaf1	18550001	0.00407725	0.477879	1722
scaf1	18575001	0.00469793	0.530006	2421
scaf1	18600001	0.00368116	0.557802	2263
scaf1	18625001	0.00314764	0.503234	1568
scaf1	18650001	0.00417179	0.594379	2522
scaf1	18675001	0.00421368	0.599244	2043
scaf1	18700001	0.00440805	0.486832	2102
scaf1	18725001	0.00423475	0.466618	2597
scaf1	18750001	0.00471516	0.515934	2253
scaf1	18775001	0.00437516	0.52959	2149
scaf1	18800001	0.00466819	0.49957	2484
scaf1	18825001	0.00468253	0.531507	2407
scaf1	18850001	0.00484473	0.553939	2579
scaf1	18875001	0.00489572	0.595603	2388
scaf1	18900001	0.00447283	0.660084	2856
scaf1	18925001	0.00472531	0.634693	2975
scaf1	18950001	0.00433648	0.582282	2663
scaf1	18975001	0.00431254	0.540499	2645
scaf1	19000001	0.00485433	0.532498	2396
scaf1	19025001	0.00457059	0.527315	2834
scaf1	19050001	0.00419597	0.552864	2252
scaf1	19075001	0.00446999	0.547402	2088
scaf1	19100001	0.00440387	0.489161	2205
scaf1	19125001	0.00433158	0.523038	2356
scaf1	19150001	0.00451913	0.543699	2319
scaf1	19175001	0.00443686	0.522798	2082
scaf1	19200001	0.00466245	0.522807	1852
scaf1	19225001	0.00492348	0.521277	1747
scaf1	19250001	0.00493748	0.558002	2756
scaf1	19275001	0.00461699	0.568454	2868
scaf1	19300001	0.00465828	0.507496	2383
scaf1	19325001	0.00476159	0.503283	2464
scaf1	19350001	0.00494174	0.53279	2009
scaf1	19375001	0.0047228	0.550495	2007
scaf1	19400001	0.00475543	0.526082	2392
scaf1	19425001	0.00477867	0.516096	2268
scaf1	19450001	0.00480434	0.525317	2426
scaf1	19475001	0.00506088	0.537863	2559
scaf1	19500001	0.00446606	0.585052	2463
scaf1	19525001	0.0045034	0.586008	2240
scaf1	19550001	0.00424146	0.528552	2195
scaf1	19575001	0.00464548	0.554151	2488
scaf1	19600001	0.00385319	0.569025	2604
scaf1	19625001	0.00345282	0.534104	2278
scaf1	19650001	0.00422606	0.585049	2059
scaf1	19675001	0.00427055	0.597995	2362
scaf1	19700001	0.0040043	0.590866	2473
scaf1	19725001	0.0038613	0.545935	2211
scaf1	19750001	0.00367235	0.526878	1817
scaf1	19775001	0.00433036	0.532654	2573
scaf1	19800001	0.00393371	0.497076	1973
scaf1	19825001	0.00288424	0.487422	1377
scaf1	19850001	0.00441732	0.491833	2087
scaf1	19875001	0.00469243	0.459742	2227
scaf1	19900001	0.00529323	0.408739	1193
scaf1	19925001	0.00464694	0.469182	1872
scaf1	19950001	0.00551688	0.481212	2508
scaf1	19975001	0.00545584	0.447249	1550
scaf1	20000001	0.0048191	0.401123	2091
scaf1	20025001	0.00510404	0.456011	2394
scaf1	20050001	0.00510348	0.533745	2584
scaf1	20075001	0.00499747	0.575285	2148
scaf1	20100001	0.00430964	0.506467	2318
scaf1	20125001	0.00474466	0.46334	2895
scaf1	20150001	0.00459722	0.499973	1983
scaf1	20175001	0.0044781	0.410049	1886
scaf1	20200001	0.00503932	0.384786	1772
scaf1	20225001	0.00483251	0.458464	1921
scaf1	20250001	0.00508999	0.495664	2125
scaf1	20275001	0.00491683	0.444506	1695
scaf1	20300001	0.00507561	0.363307	2011
scaf1	20325001	0.00511807	0.368022	2478
scaf1	20350001	0.0048092	0.363206	1724
scaf1	20375001	0.00518947	0.381407	1445
scaf1	20400001	0.00388639	0.510732	2146
scaf1	20425001	0.00441999	0.545047	2068
scaf1	20450001	0.0044489	0.505337	1644
scaf1	20475001	0.00425431	0.520547	2439
scaf1	20500001	0.00464953	0.488326	1805
scaf1	20525001	0.00413351	0.428245	1277
scaf1	20550001	0.0037844	0.501655	1707
scaf1	20575001	0.00471849	0.561902	1470
scaf1	20600001	0.00378257	0.564213	2539
scaf1	20625001	0.00361002	0.578564	2328
scaf1	20650001	0.00413828	0.606808	2493
scaf1	20675001	0.00381169	0.538323	2557
scaf1	20700001	0.00500263	0.424018	1972
scaf1	20725001	0.00433489	0.316035	2375
scaf1	20750001	0.00453628	0.204039	1828
scaf1	20775001	0.00506163	0.373788	1826
scaf1	20800001	0.0046295	0.529431	2367
scaf1	20825001	0.00456922	0.487301	1938
scaf1	20850001	0.00487034	0.454457	2430
scaf1	20875001	0.00499399	0.43427	2504
scaf1	20900001	0.00532818	0.385653	1706
scaf1	20925001	0.00483818	0.39669	1812
scaf1	20950001	0.00508199	0.434521	1280
scaf1	20975001	0.00513103	0.506793	1903
scaf1	21000001	0.00397741	0.465808	931
scaf1	21025001	0.00494554	0.500136	837
scaf1	21050001	0.00506204	0.548392	2228
scaf1	21075001	0.00479557	0.548918	1521
scaf1	21100001	0.00506194	0.534489	2015
scaf1	21125001	0.00491149	0.484211	2133
scaf1	21150001	0.00489893	0.383379	2020
scaf1	21175001	0.00506734	0.333386	2511
scaf1	21200001	0.00571715	0.351801	950
scaf1	21250001	0.00523624	0.364288	1046
scaf1	21275001	0.0058602	0.397458	291
scaf1	21325001	0.00517565	0.588249	949
scaf1	21350001	0.00434914	0.576326	1231
scaf1	21375001	0.00396571	0.530172	416
scaf1	21400001	0.00443267	0.526691	2121
scaf1	21425001	0.00477189	0.522987	1868
scaf1	21450001	0.00469293	0.446708	2080
scaf1	21475001	0.00423699	0.38344	2285
scaf1	21500001	0.00519717	0.362597	1899
scaf1	21525001	0.00517061	0.407979	2010
scaf1	21550001	0.00533104	0.459851	2566
scaf1	21575001	0.00543721	0.570014	1926
scaf1	21600001	0.00378066	0.624581	2258
scaf1	21625001	0.00426518	0.514276	2759
scaf1	21650001	0.00501121	0.334456	1197
scaf1	21675001	0.00414272	0.342359	1049
scaf1	21700001	0.00403472	0.372173	1382
scaf1	21725001	0.00463592	0.436969	1585
scaf1	21750001	0.00309933	0.491089	848
scaf1	21775001	0.00404616	0.475552	1329
scaf1	21800001	0.00487483	0.501642	1609
scaf1	21825001	0.00433194	0.614491	1268
scaf1	21850001	0.00440682	0.605287	1531
scaf1	21875001	0.00431992	0.489095	1708
scaf1	21900001	0.00509746	0.506685	2379
scaf1	21925001	0.00465806	0.472263	1855
scaf1	21950001	0.0051054	0.475239	2105
scaf1	21975001	0.00552011	0.514706	2134
scaf1	22000001	0.00511125	0.504095	2357
scaf1	22025001	0.00490844	0.403895	2282
scaf1	22050001	0.00533498	0.353426	1538
scaf1	22075001	0.00513917	0.441277	1950
scaf1	22100001	0.0060047	0.498215	1617
scaf1	22125001	0.00590379	0.564079	1587
scaf1	22150001	0.00476669	0.585382	1824
scaf1	22175001	0.00523186	0.576209	1778
scaf1	22200001	0.00431865	0.500902	1173
scaf1	22225001	0.00469269	0.46455	947
scaf1	22250001	0.00445772	0.430009	1741
scaf1	22275001	0.00444891	0.466888	1771
scaf1	22300001	0.00430001	0.489093	1340
scaf1	22325001	0.00447572	0.490718	1633
scaf1	22350001	0.00464359	0.485164	1866
scaf1	22375001	0.00437875	0.532432	1502
scaf1	22400001	0.00388225	0.597572	2369
scaf1	22425001	0.00416483	0.555364	2386
scaf1	22450001	0.00418173	0.509131	2515
scaf1	22475001	0.00408241	0.516144	2422
scaf1	22500001	0.0041335	0.526399	1234
scaf1	22525001	0.00414	0.498156	1832
scaf1	22550001	0.0045276	0.486036	1415
scaf1	22575001	0.00437111	0.492916	1372
scaf1	22600001	0.00443918	0.494462	1799
scaf1	22625001	0.00469569	0.550499	1407
scaf1	22650001	0.00491493	0.561995	1850
scaf1	22675001	0.00443685	0.520491	2103
scaf1	22700001	0.00423251	0.510274	1844
scaf1	22725001	0.00483117	0.496969	1529
scaf1	22750001	0.00533637	0.51345	2384
scaf1	22775001	0.00463854	0.553321	1992
scaf1	22800001	0.00346583	0.544379	1721
scaf1	22825001	0.00442632	0.491338	2621
scaf1	22850001	0.00464299	0.543343	1640
scaf1	22875001	0.0042049	0.584541	1364
scaf1	22900001	0.00448312	0.585604	1631
scaf1	22925001	0.00463414	0.518542	1492
scaf1	22950001	0.00389335	0.497805	1702
scaf1	22975001	0.0043071	0.497665	1766
scaf1	23000001	0.00449384	0.497182	1606
scaf1	23025001	0.00415383	0.512937	1515
scaf1	23050001	0.00429991	0.500848	1656
scaf1	23075001	0.0044391	0.487648	1918
scaf1	23100001	0.00466347	0.453882	1794
scaf1	23125001	0.00428001	0.588977	1525
scaf1	23150001	0.00361073	0.656589	2319
scaf1	23175001	0.00415054	0.55413	2189
scaf1	23200001	0.00409891	0.52879	2126
scaf1	23225001	0.00368969	0.582175	2148
scaf1	23250001	0.00538909	0.536793	1913
scaf1	23275001	0.0046561	0.461992	2061
scaf1	23350001	0.00464367	0.58526	601
scaf1	23375001	0.00606738	0.571999	80
scaf1	23400001	0.00421009	0.530136	2147
scaf1	23425001	0.00426681	0.496616	1597
scaf1	23450001	0.00414725	0.553304	1808
scaf1	23475001	0.00425751	0.530895	1945
scaf1	23500001	0.00518031	0.501441	1742
scaf1	23525001	0.00476337	0.525355	2016
scaf1	23550001	0.00503987	0.399529	712
scaf1	23575001	0.00477487	0.476901	686
scaf1	23600001	0.00444848	0.493917	2164
scaf1	23625001	0.00445898	0.471479	1817
scaf1	23650001	0.00541701	0.570257	888
scaf1	23675001	0.00498912	0.527651	1341
scaf1	23700001	0.00535276	0.49645	2037
scaf1	23725001	0.00552397	0.529761	1741
scaf1	23750001	0.00512564	0.547189	1957
scaf1	23775001	0.00505908	0.523921	1902
scaf1	23800001	0.00454015	0.532822	2332
scaf1	23825001	0.00471012	0.559077	2057
scaf1	23850001	0.00471881	0.545157	1599
scaf1	23875001	0.0048727	0.543543	1682
scaf1	23900001	0.00405695	0.58815	1911
scaf1	23925001	0.00433045	0.556164	1985
scaf1	23950001	0.00446485	0.499792	2065
scaf1	23975001	0.00403943	0.504672	1948
scaf1	24000001	0.00557817	0.545672	836
scaf1	24025001	0.00520151	0.484997	1657
scaf1	24050001	0.00567996	0.393774	1660
scaf1	24075001	0.00585631	0.402552	1003
scaf1	24100001	0.00433361	0.472152	1977
scaf1	24125001	0.00495001	0.479803	1781
scaf1	24150001	0.00418761	0.446207	1715
scaf1	24175001	0.00434035	0.475586	2156
scaf1	24200001	0.00455372	0.440878	920
scaf1	24225001	0.00419475	0.406619	1283
scaf1	24250001	0.00503967	0.41483	1354
scaf1	24275001	0.00431511	0.431283	613
scaf1	24300001	0.00355316	0.502715	1532
scaf1	24325001	0.0044532	0.53784	1944
scaf1	24350001	0.00481092	0.487082	1454
scaf1	24375001	0.00411043	0.460581	1520
scaf1	24400001	0.00475779	0.509777	1992
scaf1	24425001	0.00477454	0.498024	1669
scaf1	24450001	0.00413363	0.485123	1744
scaf1	24475001	0.00450158	0.463339	1916
scaf1	24500001	0.00493007	0.396141	1849
scaf1	24525001	0.00455515	0.353447	1709
scaf1	24550001	0.00488021	0.395974	1691
scaf1	24575001	0.00476383	0.382507	1786
scaf1	24600001	0.00445791	0.425424	1540
scaf1	24625001	0.00517784	0.43221	1585
scaf1	24650001	0.00515694	0.36678	1985
scaf1	24675001	0.0043556	0.418583	1772
scaf1	24700001	0.00422896	0.426349	1815
scaf1	24725001	0.00499709	0.423094	2047
scaf1	24750001	0.00435921	0.406739	2014
scaf1	24775001	0.00397407	0.422083	1929
scaf1	24800001	0.00443744	0.447086	1394
scaf1	24825001	0.00452001	0.42802	1710
scaf1	24850001	0.00433932	0.401014	1003
scaf1	24875001	0.00457383	0.450258	686
scaf1	24900001	0.00446736	0.526265	668
scaf1	25050001	0.00468429	0.473669	2343
scaf1	25075001	0.00453661	0.363105	1302
scaf1	25100001	0.00438026	0.378187	2009
scaf1	25125001	0.00494069	0.371782	2058
scaf1	25150001	0.00433612	0.333837	1465
scaf1	25175001	0.00398572	0.457735	1775
scaf1	25200001	0.00398647	0.452382	1440
scaf1	25225001	0.00425025	0.498237	1287
scaf1	25250001	0.00457262	0.492975	1869
scaf1	25275001	0.00415951	0.401484	1872
scaf1	25300001	0.00434019	0.44509	1747
scaf1	25325001	0.00481651	0.441756	1522
scaf1	25350001	0.00405019	0.345727	807
scaf1	25375001	0.00397004	0.464549	1109
scaf1	25400001	0.00388825	0.507433	1507
scaf1	25425001	0.00414526	0.371185	1945
scaf1	25450001	0.00389138	0.346155	1064
scaf1	25475001	0.00339699	0.370198	989
scaf1	25500001	0.00564209	0.453027	618
scaf1	25525001	0.00427333	0.453124	392
scaf1	25550001	0.00491738	0.443546	2122
scaf1	25575001	0.00551855	0.37069	1781
scaf1	25600001	0.0054923	0.324711	1323
scaf1	25625001	0.00503295	0.39005	1725
scaf1	25650001	0.00490609	0.404362	1629
scaf1	25675001	0.00490583	0.460283	1268
scaf1	25700001	0.00535645	0.493283	1464
scaf1	25725001	0.00522936	0.460121	1845
scaf1	25900001	0.00521798	0.334166	812
scaf1	25925001	0.00275109	0.268392	16
scaf1	25950001	0.00466711	0.287385	471
scaf1	25975001	0.0050346	0.352794	967
scaf1	26000001	0.00436163	0.354913	1514
scaf1	26025001	0.00451343	0.334202	1131
scaf1	26050001	0.0045531	0.360364	1535
scaf1	26075001	0.00459685	0.404323	1539
scaf1	26100001	0.00401651	0.336052	1175
scaf1	26125001	0.00403418	0.264892	1451
scaf1	26150001	0.00524139	0.349692	860
scaf1	26175001	0.00494873	0.448171	672
scaf1	26200001	0.00478546	0.381272	1233
scaf1	26225001	0.00488938	0.292495	1047
scaf1	26250001	0.00476407	0.390937	1561
scaf1	26275001	0.00499311	0.410833	1432
scaf1	26300001	0.00518836	0.393008	1707
scaf1	26325001	0.00468835	0.374838	1695
scaf1	26350001	0.00533166	0.313882	708
scaf1	26375001	0.00541236	0.30991	1540
scaf1	26575001	0.00184824	0.227017	166
scaf1	26600001	0.00537593	0.304476	998
scaf1	26625001	0.00432416	0.398858	578
scaf1	26650001	0.00508264	0.442938	1313
scaf1	26675001	0.00536462	0.387192	1271
scaf1	26700001	0.0057194	0.329755	1409
scaf1	26725001	0.00522718	0.306068	1240
scaf1	26750001	0.00485556	0.29885	788
scaf1	26775001	0.00540241	0.488166	1476
scaf1	26800001	0.00528615	0.481015	1385
scaf1	26825001	0.00497367	0.443705	511
scaf1	26850001	0.00500559	0.48802	2644
scaf1	26875001	0.0054737	0.533354	2180
scaf1	26900001	0.00448209	0.474392	734
scaf1	26925001	0.00436573	0.506168	1529
scaf1	26950001	0.00477231	0.555833	2455
scaf1	26975001	0.00463277	0.586658	1787
scaf1	27050001	0.00534867	0.34971	936
scaf1	27075001	0.00427585	0.420767	223
scaf1	27100001	0.00546704	0.437576	1851
scaf1	27125001	0.0054443	0.414106	1857
scaf1	27150001	0.00543505	0.449335	1537
scaf1	27175001	0.0058098	0.469886	1528
scaf1	27200001	0.00411699	0.495537	1731
scaf1	27225001	0.00479224	0.462443	1387
scaf1	27250001	0.00500573	0.412175	1360
scaf1	27275001	0.00438923	0.454152	1640
scaf1	27300001	0.00385364	0.446535	617
scaf1	27325001	0.00433374	0.549983	1366
scaf1	27350001	0.00436898	0.500532	2033
scaf1	27375001	0.00385598	0.397507	1199
scaf1	27400001	0.00355427	0.375804	514
scaf1	27425001	0.00454171	0.487707	1194
scaf1	27575001	0.00373458	0.335748	178
scaf1	27600001	0.00479308	0.348542	1384
scaf1	27625001	0.00557066	0.335768	562
scaf1	27650001	0.0058684	0.274683	1632
scaf1	27675001	0.00492267	0.200839	1880
scaf1	27700001	0.00538523	0.382086	902
scaf1	27725001	0.0060894	0.451306	1078
scaf1	27750001	0.00567764	0.413773	1647
scaf1	27775001	0.00563142	0.426253	1407
scaf1	27800001	0.00517585	0.42778	1341
scaf1	27825001	0.00542693	0.506288	1409
scaf1	27850001	0.00420721	0.517505	2011
scaf1	27875001	0.00447968	0.444396	1762
scaf1	27900001	0.00524376	0.413413	1658
scaf1	27925001	0.00486652	0.362171	1861
scaf1	27975001	0.00486662	0.454529	858
scaf1	28000001	0.00522065	0.38695	1325
scaf1	28025001	0.00491846	0.426887	442
scaf1	28050001	0.00469181	0.510564	2288
scaf1	28075001	0.00509622	0.503692	2001
scaf1	28100001	0.00489856	0.4687	1616
scaf1	28125001	0.0047347	0.458859	1865
scaf1	28150001	0.00431139	0.463123	1432
scaf1	28175001	0.00465454	0.445529	1638
scaf1	28200001	0.00500985	0.476876	2021
scaf1	28225001	0.00455116	0.565896	1810
scaf1	28250001	0.00362035	0.540853	1779
scaf1	28275001	0.0044616	0.426639	1873
scaf1	28300001	0.00454051	0.44359	1840
scaf1	28325001	0.00457352	0.478832	1518
scaf1	28350001	0.00443389	0.46802	951
scaf1	28375001	0.0038135	0.421822	1687
scaf1	28400001	0.00474511	0.428374	1254
scaf1	28425001	0.00494067	0.480548	1060
scaf1	28450001	0.00454226	0.448283	1952
scaf1	28475001	0.00442705	0.301711	1818
scaf1	28500001	0.00521959	0.357072	1572
scaf1	28525001	0.00526225	0.463186	1373
scaf1	28550001	0.00474584	0.471375	1443
scaf1	28575001	0.00471324	0.488683	1671
scaf1	28600001	0.00416926	0.53039	1434
scaf1	28625001	0.00445988	0.470232	1742
scaf1	28650001	0.00423912	0.473136	735
scaf1	28775001	0.0047244	0.608491	76
scaf1	28800001	0.0047869	0.562898	1860
scaf1	28825001	0.00502813	0.547133	851
scaf1	28850001	0.00464213	0.547346	858
scaf1	28875001	0.00462634	0.31533	1876
scaf1	28900001	0.0054992	0.43576	1751
scaf1	28925001	0.00507607	0.47839	668
scaf1	28950001	0.00509859	0.511052	1276
scaf1	28975001	0.00561616	0.529977	1593
scaf1	29000001	0.00484576	0.451179	991
scaf1	29025001	0.00464723	0.433743	1020
scaf1	31000001	0.00559119	0.432415	380
scaf1	31050001	0.00415142	0.423835	1632
scaf1	31075001	0.0042781	0.489685	983
scaf1	31100001	0.00559123	0.439883	1550
scaf1	31125001	0.00493152	0.289905	1889
scaf1	31150001	0.00443619	0.367412	1750
scaf1	31175001	0.00515746	0.323215	1491
scaf1	31200001	0.00556494	0.274337	1278
scaf1	31225001	0.00507559	0.356312	1767
scaf1	31250001	0.0049309	0.331582	1179
scaf1	31275001	0.00494086	0.269405	1104
scaf1	31300001	0.00564109	0.365163	1376
scaf1	31325001	0.00502424	0.405277	1219
scaf1	31350001	0.00539855	0.354123	688
scaf1	35975001	0.0063345	0.296159	40
scaf1	36000001	0.00443596	0.309121	586
scaf1	36025001	0.00508431	0.37026	644
scaf1	36050001	0.00505073	0.332295	763
scaf1	36075001	0.00467848	0.163727	663
scaf1	36100001	0.00629164	0.190475	631
scaf1	36125001	0.00574965	0.249321	845
scaf1	36150001	0.00585021	0.189567	1073
scaf1	36175001	0.0061007	0.210701	597
scaf1	36200001	0.00560015	0.323654	670
scaf1	36225001	0.00576255	0.325864	1028
scaf1	36400001	0.00585592	0.319425	878
scaf1	36550001	0.00524468	0.357	930
scaf1	36575001	0.00589719	0.4337	342
scaf1	36600001	0.0054615	0.412272	1498
scaf1	36625001	0.00526921	0.360861	1236
scaf1	36650001	0.00484895	0.4137	1581
scaf1	36675001	0.00512722	0.407569	1848
scaf1	36700001	0.00448526	0.403172	1167
scaf1	36725001	0.0044956	0.450313	1194
scaf1	36750001	0.00459358	0.42129	952
scaf1	36775001	0.00474193	0.427462	1109
scaf1	36800001	0.00447368	0.409486	781
scaf1	36825001	0.00435518	0.394164	970
scaf1	36850001	0.00525112	0.367402	1444
scaf1	36875001	0.00532394	0.322751	921
scaf1	36900001	0.00578009	0.345055	1543
scaf1	36925001	0.00539431	0.325518	1493
scaf1	36950001	0.00542441	0.295584	1240
scaf1	36975001	0.00555981	0.304969	1471
scaf1	37000001	0.00553974	0.313331	1427
scaf1	37025001	0.00567595	0.419384	1431
scaf1	37050001	0.00530501	0.465707	1973
scaf1	37075001	0.00527387	0.404603	1687
scaf1	37100001	0.00563103	0.262253	1522
scaf1	37125001	0.00559133	0.332868	1794
scaf1	37150001	0.00497129	0.386483	1951
scaf1	37175001	0.00518793	0.38905	1613
scaf1	37200001	0.00506957	0.394609	1575
scaf1	37225001	0.00514511	0.35482	1823
scaf1	37250001	0.0055829	0.322688	1250
scaf1	37275001	0.00488996	0.343141	1360
scaf1	37300001	0.00465212	0.433578	929
scaf1	37325001	0.00561556	0.432731	938
scaf1	37350001	0.00402384	0.436769	1118
scaf1	37375001	0.00420106	0.457251	1173
scaf1	37400001	0.00529223	0.458073	1559
scaf1	37425001	0.00465963	0.397019	1263
scaf1	37450001	0.00553243	0.38069	983
scaf1	37475001	0.00555485	0.353227	1662
scaf1	37500001	0.00497285	0.248446	1008
scaf1	37525001	0.00497638	0.355174	495
scaf1	37550001	0.00525499	0.438865	1289
scaf1	37575001	0.00525663	0.38232	1232
scaf1	37600001	0.00524768	0.306857	1369
scaf1	37625001	0.00525737	0.326758	1477
scaf1	37650001	0.00548611	0.373242	452
scaf1	37800001	0.00648153	0.249841	534
scaf1	37825001	0.00664232	0.358034	38
scaf1	37850001	0.00496753	0.41484	1684
scaf1	37875001	0.00556934	0.386945	1240
scaf1	37900001	0.00553077	0.375992	1644
scaf1	37925001	0.00524496	0.409454	1702
scaf1	37950001	0.00569886	0.404617	1411
scaf1	37975001	0.0057078	0.327078	1669
scaf1	38000001	0.00547296	0.392071	2011
scaf1	38025001	0.00522962	0.469692	1658
scaf1	38050001	0.00552847	0.432575	1616
scaf1	38075001	0.00563648	0.40496	2025
scaf1	38100001	0.00441465	0.528424	883
scaf1	38125001	0.00530516	0.388692	861
scaf1	38150001	0.00580097	0.280892	1105
scaf1	38175001	0.00532521	0.322764	1303
scaf1	42350001	0.00439849	0.512646	1693
scaf1	42375001	0.00489412	0.530014	377
scaf1	42400001	0.00411651	0.559702	1839
scaf1	42425001	0.00416028	0.497695	2338
scaf1	42450001	0.00441942	0.471574	1911
scaf1	42475001	0.00423857	0.524338	1683
scaf1	42500001	0.004231	0.528524	1859
scaf1	42525001	0.00465263	0.543764	1863
scaf1	42550001	0.00451403	0.561672	2306
scaf1	42575001	0.00411539	0.570856	2161
scaf1	42600001	0.00417493	0.593955	764
scaf1	42625001	0.00447353	0.607508	1939
scaf1	42650001	0.00433535	0.578751	2709
scaf1	42675001	0.00407925	0.53573	1350
scaf1	42700001	0.00460823	0.552979	2631
scaf1	42725001	0.00472441	0.568213	2708
scaf1	42750001	0.00476926	0.561642	2109
scaf1	42775001	0.00453387	0.533849	2400
scaf1	42800001	0.00417306	0.541455	2395
scaf1	42825001	0.00469468	0.588368	2164
scaf1	42850001	0.00375111	0.630777	2285
scaf1	42875001	0.00393364	0.591875	2258
scaf1	42900001	0.00533564	0.519525	2611
scaf1	42925001	0.00428548	0.522649	2631
scaf1	42950001	0.00495121	0.467005	2410
scaf1	42975001	0.005221	0.445364	2402
scaf1	43000001	0.00489158	0.488342	1231
scaf1	43025001	0.00512053	0.560244	2252
scaf1	43050001	0.0046373	0.559369	1957
scaf1	43075001	0.00424195	0.537017	1241
scaf1	43100001	0.00442258	0.539384	1808
scaf1	43125001	0.00467996	0.505933	1675
scaf1	43150001	0.00449356	0.525606	2260
scaf1	43175001	0.00472518	0.567548	2248
scaf1	43200001	0.00492601	0.513582	2332
scaf1	43225001	0.00427386	0.509691	2012
scaf1	43250001	0.00487492	0.564346	2316
scaf1	43275001	0.00520583	0.589272	2558
scaf1	43300001	0.00438747	0.541525	2025
scaf1	43325001	0.00461456	0.524622	2330
scaf1	43350001	0.00407221	0.57945	1988
scaf1	43375001	0.00409354	0.555899	1605
scaf1	43400001	0.00479785	0.511	2562
scaf1	43425001	0.00410423	0.459742	2564
scaf1	43450001	0.00544118	0.378283	1834
scaf1	43475001	0.00550464	0.421085	2168
scaf1	43500001	0.00465081	0.407725	1887
scaf1	43525001	0.00454211	0.32925	1869
scaf1	43550001	0.00482921	0.420784	2193
scaf1	43575001	0.00501271	0.543581	1943
scaf1	43600001	0.00477159	0.558293	2328
scaf1	43625001	0.00463775	0.533468	2446
scaf1	43650001	0.00414439	0.562515	2509
scaf1	43675001	0.00492855	0.600271	2372
scaf1	43700001	0.00329376	0.627691	1414
scaf1	43825001	0.00472537	0.566205	61
scaf1	43850001	0.00447683	0.588691	2345
scaf1	43875001	0.00488735	0.542935	1391
scaf1	43900001	0.00496895	0.559973	2467
scaf1	43925001	0.00468043	0.556248	2225
scaf1	43950001	0.00527056	0.513379	2174
scaf1	43975001	0.0048605	0.493029	2458
scaf1	44000001	0.00436015	0.500571	2023
scaf1	44025001	0.00497912	0.529665	2034
scaf1	44050001	0.00499894	0.524701	2345
scaf1	44075001	0.00468452	0.507615	2223
scaf1	44100001	0.0046302	0.542771	1941
scaf1	44125001	0.00501287	0.545089	2029
scaf1	44150001	0.00457544	0.543285	2357
scaf1	44175001	0.00428777	0.574103	2194
scaf1	44200001	0.00442303	0.549585	2304
scaf1	44225001	0.00468476	0.507678	2478
scaf1	44250001	0.00385213	0.496518	1932
scaf1	44275001	0.00398696	0.487722	1974
scaf1	44300001	0.00430916	0.451974	1730
scaf1	44325001	0.004202	0.481485	1989
scaf1	44350001	0.0045355	0.532579	1990
scaf1	44375001	0.00429604	0.528498	1798
scaf1	44400001	0.00394093	0.5586	1939
scaf1	44425001	0.00482106	0.660807	1975
scaf1	44450001	0.00381533	0.643552	897
scaf1	44525001	0.00478369	0.598237	159
scaf1	44550001	0.00347187	0.597417	1744
scaf1	44575001	0.00378076	0.569595	953
scaf1	44600001	0.00486346	0.583125	1622
scaf1	44625001	0.00361101	0.622317	1354
scaf1	44650001	0.00433494	0.597098	2418
scaf1	44675001	0.00484376	0.505655	2401
scaf1	44700001	0.00424173	0.499412	2157
scaf1	44725001	0.00399983	0.612429	2281
scaf1	44750001	0.00423474	0.520987	2020
scaf1	44775001	0.00409999	0.431494	1772
scaf1	44800001	0.00341796	0.47858	2008
scaf1	44825001	0.00410847	0.505233	2144
scaf1	44850001	0.00462137	0.549457	2212
scaf1	44875001	0.00410627	0.528989	2089
scaf1	44900001	0.00465249	0.536833	2249
scaf1	44925001	0.00431223	0.570023	2054
scaf1	44950001	0.00457161	0.525614	1773
scaf1	44975001	0.00483673	0.478747	2263
scaf1	45000001	0.004312	0.513626	2075
scaf1	45025001	0.00418938	0.568784	1782
scaf1	45050001	0.00457194	0.58306	2246
scaf1	45075001	0.00463925	0.60448	2198
scaf1	45100001	0.00419233	0.584137	2238
scaf1	45125001	0.00425211	0.542486	2507
scaf1	45150001	0.00418561	0.377621	688
scaf1	45175001	0.00413771	0.354825	1198
scaf1	45275001	0.00474173	0.616188	168
scaf1	45300001	0.00495146	0.603746	2244
scaf1	45325001	0.00522872	0.596563	1115
scaf1	45350001	0.00559924	0.595124	1602
scaf1	45375001	0.00526816	0.558902	2399
scaf1	45400001	0.00552899	0.561308	472
scaf1	47100001	0.00583235	0.241389	623
scaf1	47125001	0.00616957	0.251337	30
scaf1	47150001	0.00633155	0.241717	1050
scaf1	47175001	0.0061482	0.224248	1144
scaf1	47200001	0.0055373	0.242425	1016
scaf1	47225001	0.00618186	0.340343	908
scaf1	47250001	0.00511004	0.429082	969
scaf1	47275001	0.00497699	0.396268	1166
scaf1	47300001	0.00577691	0.422643	1283
scaf1	47325001	0.00565459	0.4071	1063
scaf1	47350001	0.0063677	0.372991	1137
scaf1	47375001	0.00620082	0.313054	1262
scaf1	47400001	0.00579185	0.290205	700
scaf1	47475001	0.00646093	0.542742	194
scaf1	47500001	0.00399821	0.561643	2176
scaf1	47525001	0.00361797	0.559887	742
scaf1	47550001	0.00502069	0.535217	2550
scaf1	47575001	0.0044723	0.536572	2592
scaf1	47600001	0.00466054	0.530418	2576
scaf1	47625001	0.00499785	0.515312	2616
scaf1	47650001	0.00468594	0.505799	1615
scaf1	47675001	0.00479108	0.511521	2034
scaf1	47700001	0.00407817	0.520909	2193
scaf1	47725001	0.00382109	0.479745	1785
scaf1	47750001	0.00437451	0.498242	2336
scaf1	47775001	0.00481995	0.478183	2464
scaf1	47800001	0.00502835	0.408212	2232
scaf1	47825001	0.0044836	0.435433	2310
scaf1	47850001	0.00427276	0.464638	1884
scaf1	47875001	0.00443572	0.500627	2000
scaf1	47900001	0.00444552	0.533132	1885
scaf1	47925001	0.00482884	0.584797	1812
scaf1	47950001	0.00485225	0.573387	2759
scaf1	47975001	0.00441939	0.549586	2511
scaf1	48000001	0.0046229	0.599732	1910
scaf1	48025001	0.0048287	0.556067	2041
scaf1	48050001	0.0043145	0.512234	1602
scaf1	48075001	0.0045307	0.557008	2169
scaf1	48100001	0.0034053	0.480129	1067
scaf1	48125001	0.00371445	0.461535	1336
scaf1	48150001	0.00492925	0.475635	2246
scaf1	48175001	0.0043987	0.46518	1542
scaf1	48200001	0.00472009	0.4898	2136
scaf1	48225001	0.00504267	0.524133	2363
scaf1	48250001	0.00448552	0.465761	1403
scaf1	48275001	0.0042801	0.497307	1790
scaf1	48300001	0.00497605	0.566466	1854
scaf1	48325001	0.00504437	0.494804	1358
scaf1	48350001	0.00389558	0.418577	955
scaf1	48375001	0.00415602	0.505749	1639
scaf1	48400001	0.00415402	0.509259	2093
scaf1	48425001	0.00479591	0.504718	1124
scaf1	48450001	0.00516842	0.361239	1596
scaf1	48475001	0.00442847	0.298222	2076
scaf1	48500001	0.00450957	0.45021	1675
scaf1	48525001	0.00469533	0.40647	1499
scaf1	48550001	0.00475586	0.28943	1143
scaf1	48575001	0.00466848	0.360202	1679
scaf1	48600001	0.00446883	0.473877	1658
scaf1	48625001	0.00458601	0.474017	1137
scaf1	48650001	0.00517411	0.477894	711
scaf1	48675001	0.0047007	0.455465	1273
scaf1	48700001	0.00496004	0.38777	1609
scaf1	48725001	0.00540368	0.386113	1213
scaf1	48750001	0.00457741	0.358899	882
scaf1	48775001	0.00433674	0.368351	917
scaf1	48800001	0.00515596	0.386995	1553
scaf1	48825001	0.0047287	0.447054	1515
scaf1	48850001	0.00426689	0.486469	1581
scaf1	48875001	0.00469511	0.472272	1749
scaf1	48900001	0.00459882	0.365662	550
scaf1	49000001	0.00441255	0.483237	647
scaf1	49025001	0.00227308	0.406968	28
scaf1	49050001	0.00418561	0.410391	874
scaf1	49075001	0.00433612	0.452655	927
scaf1	49100001	0.00456837	0.486785	2069
scaf1	49125001	0.00429943	0.542377	1532
scaf1	49150001	0.00429934	0.539515	1699
scaf1	49175001	0.00448641	0.51089	1874
scaf1	49200001	0.00355397	0.473801	1573
scaf1	49225001	0.0039538	0.484065	1759
scaf1	49250001	0.00372607	0.475716	1777
scaf1	49275001	0.00397732	0.516627	1616
scaf1	49300001	0.00342423	0.558431	2016
scaf1	49325001	0.00326151	0.520618	1808
scaf1	49350001	0.00346179	0.489614	1717
scaf1	49375001	0.00336768	0.46287	2039
scaf1	49400001	0.00487856	0.408502	937
scaf1	49425001	0.00435583	0.349347	1162
scaf1	49450001	0.00454198	0.339398	1564
scaf1	49475001	0.00485824	0.339145	1208
scaf1	49500001	0.00412791	0.447857	1638
scaf1	49525001	0.00437365	0.551205	1599
scaf1	49550001	0.00471185	0.543248	2429
scaf1	49575001	0.00422608	0.542628	2218
scaf1	49600001	0.00463437	0.498894	1305
scaf1	49625001	0.00466914	0.428278	1817
scaf1	49650001	0.0045154	0.426382	1954
scaf1	49675001	0.00441403	0.410104	1678
scaf1	49700001	0.00395111	0.399108	720
scaf1	49800001	0.00471365	0.423756	1007
scaf1	49825001	0.00423797	0.395376	285
scaf1	49850001	0.00487816	0.400571	1967
scaf1	49875001	0.00492072	0.471976	1716
scaf1	49900001	0.00492079	0.51537	773
scaf1	49925001	0.00485183	0.483238	1759
scaf1	49950001	0.00495048	0.465211	1605
scaf1	49975001	0.00506202	0.401706	762
scaf1	50000001	0.00453668	0.393072	1927
scaf1	50025001	0.00489317	0.417987	1693
scaf1	50050001	0.00470465	0.48786	1868
scaf1	50075001	0.00451033	0.545757	2025
scaf1	50100001	0.0044027	0.524246	1865
scaf1	50125001	0.00449671	0.518323	1904
scaf1	50150001	0.00403379	0.494192	1090
scaf1	50175001	0.00426243	0.391975	1622
scaf1	50200001	0.00441946	0.526458	1550
scaf1	50225001	0.00390612	0.53414	660
scaf1	50250001	0.00447697	0.475726	1962
scaf1	50275001	0.00454184	0.456389	2200
scaf1	50300001	0.00479143	0.432873	1947
scaf1	50325001	0.004616	0.407159	2117
scaf1	50350001	0.00380346	0.408071	1292
scaf1	50375001	0.00413862	0.380103	1668
scaf1	50450001	0.00420492	0.435668	420
scaf1	50475001	0.00497774	0.44421	61
scaf1	50500001	0.00460943	0.43471	1071
scaf1	50525001	0.00451445	0.484638	1328
scaf1	50550001	0.00461212	0.455682	960
scaf1	50575001	0.00394775	0.453393	532
scaf1	50600001	0.00482167	0.434324	2000
scaf1	50625001	0.00487805	0.422083	1468
scaf1	50650001	0.00458763	0.494315	1859
scaf1	50675001	0.00479417	0.499006	1967
scaf1	50700001	0.00469233	0.434564	1834
scaf1	50725001	0.00470978	0.462615	1925
scaf1	50750001	0.00505096	0.40941	1774
scaf1	50775001	0.00458261	0.429238	1839
scaf1	50800001	0.00403933	0.509743	1800
scaf1	50825001	0.0046269	0.46773	1819
scaf1	50850001	0.00396409	0.498348	2000
scaf1	50875001	0.00382736	0.496765	1819
scaf1	50900001	0.00466418	0.460755	1831
scaf1	50925001	0.00460402	0.467328	1977
scaf1	50950001	0.00448546	0.523272	2055
scaf1	50975001	0.00464755	0.547551	1950
scaf1	51000001	0.00400984	0.5139	2118
scaf1	51025001	0.00414987	0.505914	2169
scaf1	51050001	0.00404655	0.485667	1437
scaf1	51075001	0.00384772	0.524483	1855
scaf1	51100001	0.00358684	0.592573	1743
scaf1	51125001	0.0039117	0.601484	1672
scaf1	51150001	0.00496635	0.550372	2437
scaf1	51175001	0.00470261	0.501239	1928
scaf1	51200001	0.00518506	0.476311	1519
scaf1	51225001	0.00494002	0.416998	2264
scaf1	51250001	0.00548068	0.426125	1475
scaf1	51275001	0.00502218	0.395972	950
scaf1	51300001	0.00488988	0.425128	2139
scaf1	51325001	0.0052895	0.502909	1888
scaf1	51350001	0.00497705	0.546827	1730
scaf1	51375001	0.0047639	0.519382	1962
scaf1	51400001	0.00417177	0.477768	1844
scaf1	51425001	0.00473944	0.43046	1718
scaf1	51450001	0.00490963	0.395251	1839
scaf1	51475001	0.00463746	0.418036	1862
scaf1	51500001	0.00359866	0.41457	1208
scaf1	51525001	0.00422916	0.51748	1617
scaf1	51550001	0.00346302	0.541636	1994
scaf1	51575001	0.00354303	0.510272	1446
scaf1	51600001	0.0042637	0.488003	1861
scaf1	51625001	0.00390284	0.415828	2205
scaf1	51650001	0.00467715	0.455018	1276
scaf1	51675001	0.00414002	0.477982	1021
scaf1	51700001	0.00518328	0.429809	1136
scaf1	51725001	0.00486963	0.43746	1570
scaf1	51750001	0.00463697	0.492592	1614
scaf1	51775001	0.00508519	0.483326	1556
scaf1	51800001	0.00476335	0.467651	2031
scaf1	51825001	0.00479758	0.449394	1686
scaf1	51850001	0.00456767	0.42232	1552
scaf1	51875001	0.0045217	0.444222	1643
scaf1	51900001	0.00438291	0.460596	2078
scaf1	51925001	0.00458376	0.474824	1779
scaf1	51950001	0.0042423	0.451722	1559
scaf1	51975001	0.00399145	0.39621	1921
scaf1	52000001	0.00553396	0.395472	1552
scaf1	52025001	0.00489686	0.441043	1572
scaf1	52050001	0.00517797	0.458078	1823
scaf1	52075001	0.00553523	0.402052	1827
scaf1	52100001	0.00450835	0.372536	1729
scaf1	52125001	0.00494728	0.312822	1684
scaf1	52150001	0.00469053	0.210843	749
scaf1	52225001	0.00267981	0.327906	81
scaf1	52250001	0.00412146	0.389649	1397
scaf1	52275001	0.00386596	0.39842	772
scaf1	52300001	0.00501831	0.323486	1704
scaf1	52325001	0.00463754	0.34067	1258
scaf1	52350001	0.0048111	0.43413	1570
scaf1	52375001	0.0050099	0.500286	1773
scaf1	52400001	0.00484423	0.512894	1727
scaf1	52425001	0.00511891	0.514718	1625
scaf1	52450001	0.00374152	0.431635	707
scaf1	52475001	0.00411677	0.132727	1560
scaf1	52500001	0.00408172	0.275782	1061
scaf1	52525001	0.00329052	0.365262	525
scaf1	52550001	0.00505328	0.446136	1743
scaf1	52575001	0.00522072	0.464456	1399
scaf1	52600001	0.00458122	0.418389	1660
scaf1	52625001	0.00445196	0.436025	1956
scaf1	52650001	0.00423732	0.491024	952
scaf1	52775001	0.00727485	0.518794	49
scaf1	52800001	0.00461341	0.5008	1603
scaf1	52825001	0.00557213	0.478609	551
scaf1	52850001	0.00432906	0.516086	1724
scaf1	52875001	0.0040373	0.538812	1862
scaf1	52900001	0.00448037	0.468703	1608
scaf1	52925001	0.00437822	0.438761	1855
scaf1	52950001	0.00446646	0.470731	1862
scaf1	52975001	0.0049332	0.433042	1772
scaf1	53000001	0.00413676	0.443818	1547
scaf1	53025001	0.00410651	0.473948	1561
scaf1	53100001	0.00450043	0.450948	1426
scaf1	53125001	0.00425735	0.462014	354
scaf1	53150001	0.00482078	0.44529	784
scaf1	53175001	0.00461604	0.482136	1494
scaf1	53200001	0.00418366	0.54206	1776
scaf1	53225001	0.00442853	0.523998	820
scaf1	53250001	0.004608	0.512122	2181
scaf1	53275001	0.00445968	0.532751	2510
scaf1	53300001	0.00415632	0.485651	1524
scaf1	53325001	0.00423362	0.430353	1771
scaf1	53350001	0.00438092	0.478155	1777
scaf1	53375001	0.0045501	0.44252	1711
scaf1	53400001	0.00387119	0.425934	1615
scaf1	53425001	0.00415313	0.463087	1616
scaf1	53450001	0.00460684	0.4697	2120
scaf1	53475001	0.00411617	0.464915	1760
scaf1	53500001	0.00543131	0.469645	1674
scaf1	53525001	0.00499135	0.432202	1998
scaf1	53550001	0.00539933	0.394228	1009
scaf1	53575001	0.00563095	0.427695	1220
scaf1	53600001	0.00484	0.424515	1500
scaf1	53625001	0.00497304	0.431342	1331
scaf1	53675001	0.00468329	0.401289	1059
scaf1	53700001	0.00446283	0.436528	1241
scaf1	53725001	0.00507635	0.446532	427
scaf1	53750001	0.00430195	0.363528	627
scaf1	53775001	0.00413918	0.388852	954
scaf1	53800001	0.0055595	0.423269	653
scaf1	53825001	0.0050206	0.278243	1129
scaf1	53850001	0.0047703	0.373669	542
scaf1	53875001	0.00554922	0.469495	306
scaf1	53900001	0.00449188	0.508416	2012
scaf1	53925001	0.0043084	0.515912	1098
scaf1	53950001	0.00456451	0.46024	1480
scaf1	53975001	0.00437374	0.445939	1927
scaf1	54000001	0.00439705	0.434064	1531
scaf1	54025001	0.00456102	0.514619	1434
scaf1	54050001	0.00499999	0.521265	1929
scaf1	54075001	0.00460795	0.33927	1970
scaf1	54100001	0.0048024	0.359105	1466
scaf1	54125001	0.00530422	0.388141	1415
scaf1	54150001	0.0045674	0.370896	1210
scaf1	54175001	0.00468678	0.527249	1503
scaf1	54200001	0.00432113	0.506667	2160
scaf1	54225001	0.00421145	0.417857	1638
scaf1	54250001	0.00467927	0.367298	1379
scaf1	54275001	0.0045652	0.361519	1966
scaf1	54300001	0.00504529	0.400418	1980
scaf1	54325001	0.00486637	0.40092	1586
scaf1	54350001	0.00389303	0.403737	1081
scaf1	54375001	0.00483514	0.454795	1418
scaf1	54400001	0.00415455	0.392854	1446
scaf1	54425001	0.00395752	0.247778	1306
scaf1	54450001	0.00559802	0.332534	1178
scaf1	54475001	0.00455926	0.340097	1151
scaf1	54500001	0.00635275	0.287076	1499
scaf1	54525001	0.00611636	0.378643	1653
scaf1	54550001	0.0043807	0.382455	782
scaf1	57400001	0.00473898	0.311107	514
scaf1	57425001	0.00475161	0.370304	733
scaf1	57450001	0.00389146	0.382989	368
scaf1	57475001	0.00381715	0.475637	285
scaf1	57550001	0.00474237	0.525212	954
scaf1	57575001	0.00491146	0.489695	290
scaf1	57675001	0.00427231	0.311335	129
scaf1	57700001	0.00551701	0.293164	1133
scaf1	57725001	0.00549387	0.269333	959
scaf1	57750001	0.00397286	0.326744	594
scaf1	57775001	0.00482067	0.289661	769
scaf1	57800001	0.00488487	0.31077	603
scaf1	57825001	0.00464334	0.291362	676
scaf1	57850001	0.0044733	0.15436	392
scaf1	57875001	0.00451244	0.253274	444
scaf1	57900001	0.00436532	0.350015	532
scaf1	57925001	0.003553	0.383797	470
scaf1	57950001	0.00440326	0.434447	509
scaf1	57975001	0.00551123	0.382141	476
scaf1	58000001	0.0044768	0.320404	1440
scaf1	58025001	0.00387173	0.381413	789
scaf1	58050001	0.00529853	0.425315	1260
scaf1	58075001	0.00466924	0.373667	1416
scaf1	58175001	0.00605418	0.431449	125
scaf1	58200001	0.0060284	0.407853	483
scaf1	58250001	0.00444408	0.28881	493
scaf1	58275001	0.00585378	0.41713	206
scaf1	58300001	0.00525095	0.424767	501
scaf1	58325001	0.00467203	0.413714	817
scaf1	58350001	0.00516196	0.323057	855
scaf1	58375001	0.00446225	0.169512	490
scaf1	58400001	0.00485637	0.236926	527
scaf1	58475001	0.00511226	-0.0371648	155
scaf1	58500001	0.00626511	0.0124228	1034
scaf1	58525001	0.00587665	0.152756	550
scaf1	58550001	0.00563531	0.272627	980
scaf1	58575001	0.00606178	0.17038	1217
scaf1	58600001	0.00546118	0.189532	849
scaf1	58625001	0.00619287	0.292205	982
scaf1	58750001	0.00559762	0.154627	537
scaf1	58775001	0.00539294	0.149277	112
scaf1	58800001	0.00584565	0.143918	1443
scaf1	58825001	0.00569336	0.166538	1218
scaf1	59125001	0.00277571	0.329598	129
scaf1	59150001	0.00400838	0.374672	1208
scaf1	59175001	0.00387384	0.420442	575
scaf1	59200001	0.00434966	0.443403	1630
scaf1	59225001	0.00397895	0.374605	1517
scaf1	59250001	0.00507245	0.37636	1082
scaf1	59275001	0.00502905	0.402477	1356
scaf1	59375001	0.00440863	0.428048	183
scaf1	59400001	0.00589033	0.369325	1134
scaf1	59425001	0.00609836	0.350182	217
scaf1	59450001	0.0056564	0.314478	1410
scaf1	59475001	0.00580249	0.323604	1724
scaf1	59500001	0.00544875	0.365904	1584
scaf1	59525001	0.00539493	0.368815	1455
scaf1	59550001	0.00469669	0.369871	1143
scaf1	59575001	0.004889	0.376527	1535
scaf1	59600001	0.00434202	0.445314	1566
scaf1	59625001	0.00498331	0.471507	989
scaf1	59650001	0.00462631	0.420362	1304
scaf1	59675001	0.00421948	0.348899	1579
scaf1	59700001	0.0043904	0.367958	893
scaf1	59725001	0.00469523	0.43131	949
scaf1	59750001	0.00399968	0.412619	732
scaf2	50001	0.00417125	0.370246	1254
scaf2	75001	0.00469069	0.372273	834
scaf2	100001	0.00474663	0.358035	1067
scaf2	125001	0.00439382	0.31807	1227
scaf2	150001	0.00476385	0.320284	1116
scaf2	175001	0.00500761	0.299996	1163
scaf2	200001	0.00491649	0.295864	680
scaf2	225001	0.0044642	0.348387	832
scaf2	250001	0.00587207	0.343885	695
scaf2	275001	0.00549386	0.247926	650
scaf2	300001	0.0052456	0.249361	788
scaf2	325001	0.00562167	0.267405	627
scaf2	350001	0.00477393	0.292597	903
scaf2	375001	0.00491363	0.384058	917
scaf2	400001	0.00450003	0.406856	1352
scaf2	425001	0.00452397	0.378088	1336
scaf2	450001	0.00591232	0.38278	862
scaf2	600001	0.00478406	0.338382	1139
scaf2	625001	0.00407576	0.292222	859
scaf2	650001	0.00489453	0.217124	428
scaf2	725001	0.00495214	0.409881	106
scaf2	750001	0.00525848	0.448539	1155
scaf2	775001	0.00550408	0.394955	697
scaf2	800001	0.0049677	0.357265	1427
scaf2	825001	0.00491151	0.322753	1589
scaf2	850001	0.0056698	0.195842	535
scaf2	875001	0.00542648	0.240123	612
scaf2	900001	0.00599491	0.248594	1025
scaf2	925001	0.00586273	0.172652	955
scaf2	950001	0.00718113	0.144815	590
scaf2	975001	0.00662097	0.160524	761
scaf2	1050001	0.00754426	0.3376	472
scaf2	1075001	0.0057166	0.438917	277
scaf2	1100001	0.00518178	0.452299	1418
scaf2	1125001	0.00585311	0.44602	1135
scaf2	1150001	0.00534193	0.507162	1102
scaf2	1175001	0.00551795	0.412039	1266
scaf2	1200001	0.0059886	0.354059	1240
scaf2	1225001	0.00603602	0.327303	1362
scaf2	1250001	0.00542374	0.251955	1043
scaf2	1275001	0.00536423	0.384132	1027
scaf2	1300001	0.00445734	0.426165	1249
scaf2	1325001	0.0048827	0.421581	1150
scaf2	1350001	0.00441922	0.423625	951
scaf2	1375001	0.00449193	0.301051	1192
scaf2	1400001	0.00582762	0.244068	1137
scaf2	1425001	0.00470043	0.29938	901
scaf2	1450001	0.0060088	0.308819	997
scaf2	1475001	0.00616812	0.237304	1077
scaf2	1500001	0.00472736	0.356944	1088
scaf2	1525001	0.00524691	0.476357	921
scaf2	1550001	0.00488135	0.432562	1460
scaf2	1575001	0.00496543	0.485036	1342
scaf2	1600001	0.00408797	0.525913	1469
scaf2	1625001	0.00419909	0.493586	1520
scaf2	1650001	0.00546224	0.459981	1251
scaf2	1675001	0.00495631	0.431461	1449
scaf2	1700001	0.00524211	0.429283	1137
scaf2	1725001	0.0052907	0.405566	1098
scaf2	2900001	0.00500845	0.359247	728
scaf2	2925001	0.00326159	0.478662	205
scaf2	2950001	0.00516072	0.454344	1589
scaf2	2975001	0.00560325	0.40383	1301
scaf2	3000001	0.00544152	0.421926	1389
scaf2	3025001	0.00534296	0.376416	1425
scaf2	3050001	0.00574016	0.452098	820
scaf2	3075001	0.00530572	0.454091	905
scaf2	3100001	0.00560006	0.443292	1378
scaf2	3125001	0.00582174	0.466567	1332
scaf2	3150001	0.00617132	0.47309	1271
scaf2	3175001	0.00577865	0.489055	1321
scaf2	3200001	0.00553977	0.436978	855
scaf2	3225001	0.00562209	0.341195	1400
scaf2	3250001	0.00469608	0.369632	1708
scaf2	3275001	0.00510168	0.462404	1191
scaf2	3300001	0.00515209	0.446499	2338
scaf2	3325001	0.00464946	0.422965	1952
scaf2	3350001	0.00608928	0.468231	1838
scaf2	3375001	0.00598279	0.396704	2054
scaf2	3400001	0.00724529	0.304346	716
scaf2	3425001	0.00650595	0.245057	1531
scaf2	3450001	0.00532614	0.200313	945
scaf2	3475001	0.00622629	0.169665	618
scaf2	3500001	0.00456227	0.164383	928
scaf2	3525001	0.00467158	0.153156	756
scaf2	3550001	0.00524725	0.311319	1394
scaf2	3575001	0.0047993	0.407344	921
scaf2	3600001	0.00478761	0.490473	2135
scaf2	3625001	0.00519348	0.497859	1963
scaf2	3650001	0.00505859	0.416196	1763
scaf2	3675001	0.00486681	0.382514	2067
scaf2	3700001	0.00297108	0.332089	611
scaf2	3750001	0.00487292	0.407037	942
scaf2	3775001	0.00259871	0.404698	366
scaf2	3950001	0.00472943	0.280027	744
scaf2	3975001	0.00564413	0.36456	270
scaf2	4000001	0.0043675	0.474179	1301
scaf2	4025001	0.00459672	0.448111	1247
scaf2	4050001	0.00468613	0.389787	1560
scaf2	4075001	0.00393087	0.384908	1201
scaf2	4100001	0.00476092	0.347934	1901
scaf2	4125001	0.00490903	0.352575	1895
scaf2	4150001	0.00486758	0.483947	1395
scaf2	4175001	0.00472809	0.535888	1607
scaf2	4200001	0.00386647	0.498041	1741
scaf2	4225001	0.00454546	0.452339	1706
scaf2	4250001	0.00450082	0.390092	1535
scaf2	4275001	0.00404085	0.461265	1457
scaf2	4300001	0.00478404	0.49475	1802
scaf2	4325001	0.0045438	0.430327	1739
scaf2	4350001	0.00531419	0.398034	1324
scaf2	4375001	0.00539293	0.340744	1626
scaf2	4400001	0.0045911	0.506389	1585
scaf2	4425001	0.00473805	0.559395	1198
scaf2	4450001	0.00481069	0.514009	1132
scaf2	4475001	0.00461204	0.429977	1396
scaf2	4500001	0.00459136	0.298339	1622
scaf2	4525001	0.00485283	0.222899	1645
scaf2	4550001	0.00575022	0.296233	1280
scaf2	4575001	0.00476452	0.399972	1198
scaf2	4600001	0.0054884	0.449794	1609
scaf2	4625001	0.00545004	0.485555	1515
scaf2	4650001	0.00461664	0.455834	1687
scaf2	4675001	0.00498346	0.393578	1975
scaf2	4700001	0.00482372	0.477595	1393
scaf2	4725001	0.00510453	0.428622	874
scaf2	4750001	0.00507347	0.332046	1212
scaf2	4775001	0.00483745	0.395161	1852
scaf2	4800001	0.00591015	0.394077	1512
scaf2	4825001	0.00557498	0.437826	1147
scaf2	4850001	0.00439582	0.520843	1991
scaf2	4875001	0.00554726	0.521337	1858
scaf2	4900001	0.00439004	0.52837	1274
scaf2	4925001	0.00402103	0.48405	1841
scaf2	4950001	0.00543909	0.418739	1685
scaf2	4975001	0.00480328	0.410298	1355
scaf2	5000001	0.00506949	0.363741	1805
scaf2	5025001	0.00524728	0.411401	1798
scaf2	5050001	0.00462625	0.464223	1618
scaf2	5075001	0.00491365	0.505872	1727
scaf2	5100001	0.00451742	0.483065	1738
scaf2	5125001	0.00460405	0.460096	1491
scaf2	5150001	0.00465388	0.536114	1943
scaf2	5175001	0.0047621	0.532151	1936
scaf2	5200001	0.00508302	0.491356	1883
scaf2	5225001	0.00487735	0.440333	1879
scaf2	5250001	0.00394383	0.448708	2049
scaf2	5275001	0.00418263	0.429339	1989
scaf2	5300001	0.00517687	0.448543	2170
scaf2	5325001	0.00482412	0.49894	2239
scaf2	5350001	0.00471145	0.470233	2365
scaf2	5375001	0.00517311	0.51973	1990
scaf2	5400001	0.00331577	0.562299	806
scaf2	5425001	0.00390456	0.590664	2091
scaf2	5450001	0.00402151	0.565804	2031
scaf2	5475001	0.00305002	0.454405	959
scaf2	5500001	0.00466903	0.474251	2042
scaf2	5525001	0.00484294	0.532122	2239
scaf2	5550001	0.00433278	0.567827	1835
scaf2	5575001	0.00442927	0.546756	1573
scaf2	5600001	0.00414287	0.420948	1109
scaf2	5625001	0.00424441	0.51847	1763
scaf2	5650001	0.00480188	0.503352	1668
scaf2	5675001	0.00425335	0.442859	1408
scaf2	5700001	0.0049211	0.539045	2100
scaf2	5725001	0.00551814	0.567787	1790
scaf2	5750001	0.00513463	0.560128	2310
scaf2	5775001	0.0047973	0.555999	2184
scaf2	5800001	0.0043638	0.519859	1655
scaf2	5825001	0.00489333	0.478411	2086
scaf2	5850001	0.00519773	0.460351	1786
scaf2	5875001	0.00442418	0.488518	1745
scaf2	5900001	0.00523865	0.465968	1727
scaf2	5925001	0.0052559	0.427683	1563
scaf2	5950001	0.00511782	0.404309	1552
scaf2	5975001	0.00542039	0.445231	1647
scaf2	6000001	0.00385052	0.521982	436
scaf2	6050001	0.00415527	0.510707	1004
scaf2	6075001	0.00306541	0.519307	160
scaf2	6100001	0.00543922	0.540733	1556
scaf2	6125001	0.00498794	0.534117	1604
scaf2	6150001	0.00481673	0.541638	1980
scaf2	6175001	0.00516361	0.561933	1736
scaf2	6200001	0.004242	0.582356	2155
scaf2	6225001	0.0046367	0.577978	2185
scaf2	6250001	0.00469927	0.49314	1810
scaf2	6275001	0.0041762	0.43593	1925
scaf2	6300001	0.00508175	0.437147	2174
scaf2	6325001	0.00505994	0.433017	2219
scaf2	6350001	0.00489183	0.452227	2325
scaf2	6375001	0.0048526	0.510147	1974
scaf2	6400001	0.00459595	0.570297	1867
scaf2	6425001	0.00474771	0.552636	1799
scaf2	6450001	0.00454126	0.521838	2211
scaf2	6475001	0.00461562	0.488041	2427
scaf2	6500001	0.00398461	0.532508	2529
scaf2	6525001	0.00407547	0.581312	2385
scaf2	6550001	0.00506225	0.485193	2098
scaf2	6575001	0.00474843	0.469654	2642
scaf2	6600001	0.00475361	0.546738	2300
scaf2	6625001	0.00485036	0.579558	1904
scaf2	6650001	0.00513237	0.55445	2520
scaf2	6675001	0.00471732	0.494728	2341
scaf2	6700001	0.00569097	0.492808	2247
scaf2	6725001	0.00538073	0.49931	2412
scaf2	6750001	0.00470385	0.526474	2261
scaf2	6775001	0.00541038	0.542937	2216
scaf2	6800001	0.00480762	0.481492	1896
scaf2	6825001	0.0045669	0.45946	2001
scaf2	6850001	0.0050098	0.512211	2119
scaf2	6875001	0.00517151	0.453465	2147
scaf2	6900001	0.00484256	0.39696	1872
scaf2	6925001	0.00496318	0.462596	2106
scaf2	6950001	0.00455952	0.495494	1734
scaf2	6975001	0.00483982	0.457408	1687
scaf2	7000001	0.00535476	0.43121	1960
scaf2	7025001	0.00495194	0.397422	1907
scaf2	7050001	0.0052629	0.408047	2361
scaf2	7075001	0.00540437	0.437113	2162
scaf2	7100001	0.00542019	0.376227	551
scaf2	7125001	0.00470404	0.387705	1069
scaf2	7150001	0.00546962	0.446858	1692
scaf2	7175001	0.00584259	0.429055	1304
scaf2	7275001	0.00265752	0.360711	12
scaf2	7300001	0.00541118	0.377844	389
scaf2	7375001	0.00458969	0.56063	68
scaf2	7400001	0.00426131	0.572739	1506
scaf2	7425001	0.00413254	0.59067	935
scaf2	7450001	0.00442933	0.513494	1153
scaf2	7475001	0.00440381	0.524759	596
scaf2	7500001	0.004357	0.531888	2278
scaf2	7525001	0.00441078	0.51326	2371
scaf2	7550001	0.00517332	0.445839	2338
scaf2	7575001	0.00469893	0.364726	2272
scaf2	7600001	0.00471124	0.430617	2296
scaf2	7625001	0.00506453	0.47412	2186
scaf2	7650001	0.00483324	0.48563	2647
scaf2	7675001	0.00447687	0.496104	2566
scaf2	7700001	0.00450921	0.480618	2270
scaf2	7725001	0.00480082	0.478936	2291
scaf2	7750001	0.00416842	0.505756	2044
scaf2	7775001	0.0042699	0.523135	2281
scaf2	7800001	0.00426748	0.491687	1720
scaf2	7825001	0.00420965	0.509505	1921
scaf2	7850001	0.00366673	0.588581	1293
scaf2	7875001	0.00438475	0.589185	1786
scaf2	7900001	0.00412023	0.588576	1961
scaf2	7925001	0.00384016	0.57979	1372
scaf2	7950001	0.0048152	0.500004	2435
scaf2	7975001	0.00467576	0.512015	2288
scaf2	8000001	0.00515477	0.45415	1968
scaf2	8025001	0.0046753	0.508148	2095
scaf2	8050001	0.00472238	0.570539	2674
scaf2	8075001	0.00500798	0.553449	2427
scaf2	8100001	0.00464227	0.56614	2438
scaf2	8125001	0.00455619	0.54524	2306
scaf2	8150001	0.00504243	0.548868	2362
scaf2	8175001	0.0052436	0.566471	2738
scaf2	8200001	0.00455508	0.543911	842
scaf2	8225001	0.00409325	0.639325	1351
scaf2	8250001	0.00404589	0.662732	2840
scaf2	8275001	0.00467634	0.598347	2042
scaf2	8300001	0.0048996	0.518919	2326
scaf2	8325001	0.00410016	0.488585	2304
scaf2	8350001	0.00439757	0.464909	2147
scaf2	8375001	0.00477134	0.501955	2493
scaf2	8400001	0.00380189	0.589115	2660
scaf2	8425001	0.00410864	0.614559	2024
scaf2	8450001	0.00413629	0.526668	2306
scaf2	8475001	0.00399894	0.491184	2760
scaf2	8500001	0.00419099	0.508124	2306
scaf2	8525001	0.00401249	0.498158	2303
scaf2	8550001	0.00399832	0.579097	2498
scaf2	8575001	0.00446022	0.577591	2253
scaf2	8600001	0.00461693	0.509315	1962
scaf2	8625001	0.0040639	0.498905	2171
scaf2	8650001	0.0047598	0.463543	2111
scaf2	8675001	0.0045709	0.482525	2350
scaf2	8700001	0.00421679	0.524605	1484
scaf2	8725001	0.00461782	0.541166	1681
scaf2	8750001	0.0044548	0.563264	2307
scaf2	8775001	0.00407823	0.531402	1897
scaf2	8800001	0.00478903	0.474123	1995
scaf2	8825001	0.00486853	0.50919	2148
scaf2	8850001	0.00424039	0.554485	2001
scaf2	8875001	0.00451417	0.543607	1835
scaf2	8900001	0.00389536	0.531716	1700
scaf2	8925001	0.00406361	0.473274	2165
scaf2	8950001	0.00366051	0.516543	2076
scaf2	8975001	0.00390395	0.556827	1462
scaf2	9000001	0.00325633	0.505502	1787
scaf2	9025001	0.00330944	0.453454	2359
scaf2	9050001	0.00514654	0.459791	2078
scaf2	9075001	0.00424235	0.435956	1704
scaf2	9100001	0.0049745	0.371895	2045
scaf2	9125001	0.00517672	0.45194	1979
scaf2	9150001	0.00524686	0.522839	2445
scaf2	9175001	0.00504682	0.562684	2275
scaf2	9200001	0.00380094	0.590237	2604
scaf2	9225001	0.00484528	0.570074	2672
scaf2	9250001	0.00245225	0.554646	1443
scaf2	9275001	0.00306316	0.568386	1642
scaf2	9300001	0.00441355	0.527803	2599
scaf2	9325001	0.00325065	0.453433	2236
scaf2	9350001	0.004677	0.474001	2069
scaf2	9375001	0.00486626	0.556619	2534
scaf2	9400001	0.00404973	0.519089	2062
scaf2	9425001	0.0040081	0.493075	2112
scaf2	9450001	0.00467098	0.524877	2280
scaf2	9475001	0.00433971	0.499043	2132
scaf2	9500001	0.00494815	0.460368	2079
scaf2	9525001	0.00499475	0.512427	2211
scaf2	9550001	0.00376812	0.526889	2173
scaf2	9575001	0.00399717	0.481678	2135
scaf2	9600001	0.00469008	0.473632	825
scaf2	9625001	0.00452911	0.324678	1797
scaf2	9650001	0.00456879	0.475651	2091
scaf2	9675001	0.00460018	0.559073	1059
scaf2	9700001	0.00496552	0.539585	2204
scaf2	9725001	0.00471937	0.507658	1981
scaf2	9750001	0.00460452	0.533053	2085
scaf2	9775001	0.00477803	0.556409	2175
scaf2	9800001	0.00444732	0.460162	2143
scaf2	9825001	0.00450756	0.441151	1986
scaf2	9850001	0.00495397	0.441167	2213
scaf2	9875001	0.00470956	0.454838	2560
scaf2	9900001	0.00499743	0.50714	2115
scaf2	9925001	0.00525182	0.540278	2094
scaf2	9950001	0.00592335	0.471342	614
scaf2	9975001	0.00446295	0.490018	1014
scaf2	10000001	0.00546823	0.414465	2499
scaf2	10025001	0.00573505	0.351627	1869
scaf2	10050001	0.00525399	0.471771	2398
scaf2	10075001	0.00547659	0.5197	2456
scaf2	10100001	0.00435099	0.440052	2368
scaf2	10125001	0.00448549	0.459656	2419
scaf2	10150001	0.00504716	0.51654	2680
scaf2	10175001	0.00503113	0.511658	2268
scaf2	10200001	0.00485348	0.505442	1138
scaf2	10225001	0.00469259	0.464029	2517
scaf2	10250001	0.00421902	0.569594	1031
scaf2	10275001	0.00589231	0.489558	492
scaf2	10300001	0.00355243	0.424271	1614
scaf2	10325001	0.00324293	0.46865	1370
scaf2	10350001	0.00439795	0.482914	2037
scaf2	10375001	0.00419553	0.559381	1892
scaf2	10400001	0.00427432	0.597234	2540
scaf2	10425001	0.00432679	0.62019	2515
scaf2	10450001	0.00377659	0.640916	2887
scaf2	10475001	0.00400054	0.627276	2726
scaf2	10500001	0.00373972	0.575728	2565
scaf2	10525001	0.00376766	0.529469	2632
scaf2	10550001	0.00497756	0.531463	2021
scaf2	10575001	0.00444489	0.543951	2177
scaf2	10600001	0.0038009	0.542692	2050
scaf2	10625001	0.00451319	0.553801	1956
scaf2	10650001	0.00421968	0.531391	2079
scaf2	10675001	0.00373752	0.478084	2369
scaf2	10700001	0.00435633	0.511758	1677
scaf2	10725001	0.00429658	0.57532	1802
scaf2	10750001	0.00494437	0.56939	1632
scaf2	10775001	0.00487987	0.573398	1297
scaf2	10800001	0.00462297	0.516837	2309
scaf2	10825001	0.00471204	0.497613	2468
scaf2	10850001	0.00422807	0.618599	2356
scaf2	10875001	0.00428535	0.598374	2004
scaf2	10900001	0.00470383	0.562377	1809
scaf2	10925001	0.00459411	0.557932	2111
scaf2	10950001	0.00397539	0.483266	1729
scaf2	10975001	0.00413419	0.535355	1623
scaf2	11000001	0.004853	0.568698	2638
scaf2	11025001	0.00473773	0.520491	2422
scaf2	11050001	0.00530814	0.485409	2051
scaf2	11075001	0.00452937	0.508728	2245
scaf2	11100001	0.00517554	0.492237	1959
scaf2	11125001	0.00556386	0.538686	2229
scaf2	11150001	0.0048429	0.556305	2513
scaf2	11175001	0.00471771	0.508454	2173
scaf2	11200001	0.00487283	0.540775	2142
scaf2	11225001	0.00541617	0.536628	2275
scaf2	11250001	0.00521851	0.445333	2024
scaf2	11275001	0.00457779	0.458927	1978
scaf2	11300001	0.00475842	0.497011	1755
scaf2	11325001	0.00493441	0.522146	1898
scaf2	11350001	0.00315864	0.622264	783
scaf2	11375001	0.00452605	0.580404	1581
scaf2	11400001	0.00351309	0.521828	1787
scaf2	11425001	0.00329479	0.444605	912
scaf2	11450001	0.00410956	0.439109	2126
scaf2	11475001	0.00419316	0.510894	2143
scaf2	11500001	0.00403159	0.589063	1864
scaf2	11525001	0.00378109	0.57757	1815
scaf2	11550001	0.00416852	0.54679	1777
scaf2	11575001	0.00391698	0.526075	1909
scaf2	11600001	0.0040466	0.550481	1736
scaf2	11625001	0.00428173	0.549411	1651
scaf2	11650001	0.00449245	0.52929	1152
scaf2	11675001	0.00408178	0.523908	1665
scaf2	11700001	0.00499432	0.56062	1729
scaf2	11725001	0.00486913	0.51531	1086
scaf2	11750001	0.00442012	0.420619	2018
scaf2	11775001	0.00484022	0.436285	2038
scaf2	11800001	0.00421112	0.500156	1895
scaf2	11825001	0.00427727	0.527102	1950
scaf2	11850001	0.00430069	0.494749	1745
scaf2	11875001	0.00407037	0.478443	2058
scaf2	11900001	0.00401421	0.531501	1976
scaf2	11925001	0.00420337	0.57171	1655
scaf2	11950001	0.00444772	0.434061	1416
scaf2	11975001	0.00449785	0.45543	1355
scaf2	12000001	0.00356601	0.488082	1466
scaf2	12025001	0.0040112	0.440298	1552
scaf2	12050001	0.00328152	0.434942	1498
scaf2	12075001	0.00359047	0.484161	1787
scaf2	12100001	0.00320617	0.513131	1788
scaf2	12125001	0.00308706	0.520985	1458
scaf2	12150001	0.00306434	0.528515	1399
scaf2	12175001	0.00309049	0.49533	1891
scaf2	12200001	0.00384079	0.522296	2138
scaf2	12225001	0.00347327	0.476287	1756
scaf2	12250001	0.00338881	0.433457	1617
scaf2	12275001	0.00332578	0.523841	1878
scaf2	12300001	0.00441862	0.524547	2108
scaf2	12325001	0.00404534	0.486002	1759
scaf2	12350001	0.00565199	0.497474	1268
scaf2	12375001	0.00559264	0.584009	1940
scaf2	12400001	0.00456856	0.534319	1739
scaf2	12425001	0.00450591	0.482899	1351
scaf2	12450001	0.00503241	0.470409	1759
scaf2	12475001	0.00465585	0.403976	1707
scaf2	12500001	0.00541408	0.397529	1640
scaf2	12525001	0.00572827	0.364243	1524
scaf2	12550001	0.00525685	0.359209	1458
scaf2	12575001	0.00520288	0.41041	1579
scaf2	12600001	0.00504763	0.426841	1770
scaf2	12625001	0.00537326	0.396684	1756
scaf2	12650001	0.00515785	0.335482	1221
scaf2	12675001	0.00491809	0.376442	1344
scaf2	12700001	0.00508208	0.440555	1532
scaf2	12725001	0.00480529	0.390634	1363
scaf2	12750001	0.00441654	0.313949	1262
scaf2	12775001	0.00507278	0.42264	1392
scaf2	12800001	0.00497388	0.45413	1619
scaf2	12825001	0.00415661	0.400746	1475
scaf2	12850001	0.00524998	0.405926	1864
scaf2	12875001	0.00537857	0.408829	1944
scaf2	12900001	0.0049922	0.424737	1499
scaf2	12925001	0.00523426	0.467393	1533
[truncated: 28,110 more rows]
